# Supplementary material for: Anxiety and depression among people with type 2 diabetes visiting diabetes clinics of Pokhara Metropolitan, Nepal: a cross-sectional study
Source: PubMed Central journal article supplement — BMJ Open. 2023 Jan 27;13(1):e064490. doi: 10.1136/bmjopen-2022-064490 (PMC9884930; doi:10.1136/bmjopen-2022-064490), 2023-01-27
Supplement: bmjopen-2022-064490.draft_revisions.pdf [file bmjopen-2022-064490.draft_revisions.pdf]

# BMJ Open

BMJ Open is committed to open peer review. As part of this commitment we make the peer review history of every article we publish publicly available.

When an article is published we post the peer reviewers' comments and the authors' responses online. We also post the versions of the paper that were used during peer review. These are the versions that the peer review comments apply to.

The versions of the paper that follow are the versions that were submitted during the peer review process. They are not the versions of record or the final published versions. They should not be cited or distributed as the published version of this manuscript.

BMJ Open is an open access journal and the full, final, typeset and author-corrected version of record of the manuscript is available on our site with no access controls, subscription charges or pay-per-view fees (<http://bmjopen.bmj.com>).

If you have any questions on BMJ Open's open peer review process please email [info.bmjopen@bmj.com](mailto:info.bmjopen@bmj.com)

# BMJ Open

## Anxiety and Depression among Type-II Diabetes Patients Visiting Diabetes Clinics of Pokhara Metropolitan, Nepal

|                               |                                                                                                                                                                                                                                                                                                                                                                                                                                                                                                                                                                                                                                            |
|-------------------------------|--------------------------------------------------------------------------------------------------------------------------------------------------------------------------------------------------------------------------------------------------------------------------------------------------------------------------------------------------------------------------------------------------------------------------------------------------------------------------------------------------------------------------------------------------------------------------------------------------------------------------------------------|
| Journal:                      | <i>BMJ Open</i>                                                                                                                                                                                                                                                                                                                                                                                                                                                                                                                                                                                                                            |
| Manuscript ID                 | bmjopen-2022-064490                                                                                                                                                                                                                                                                                                                                                                                                                                                                                                                                                                                                                        |
| Article Type:                 | Original research                                                                                                                                                                                                                                                                                                                                                                                                                                                                                                                                                                                                                          |
| Date Submitted by the Author: | 10-May-2022                                                                                                                                                                                                                                                                                                                                                                                                                                                                                                                                                                                                                                |
| Complete List of Authors:     | Paudel, Shishir; Manmohan Memorial Institute of Health Sciences, Department of Public Health<br>Khanal, Shankar; Tribhuvan University, Central Department of Statistics<br>Gautam, Sujana; Manmohan Memorial Institute of Health Sciences, Department of Public Health<br>Chalise, Anisha; Tribhuvan University Institute of Medicine, Central Department of Public Health; Center for Research on Environment Health & Population Activities (CREHPA)<br>Koirala, Tara ; Pokhara Super Speciality Health Clinic<br>Marahatta, Sujana; Manmohan Memorial Institute of Health Sciences, Department of Public Health; Nepal Open University, |
| Keywords:                     | Anxiety disorders < PSYCHIATRY, Depression & mood disorders < PSYCHIATRY, DIABETES & ENDOCRINOLOGY, MENTAL HEALTH                                                                                                                                                                                                                                                                                                                                                                                                                                                                                                                          |
|                               |                                                                                                                                                                                                                                                                                                                                                                                                                                                                                                                                                                                                                                            |

SCHOLARONE™  
Manuscripts

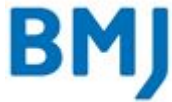

I, the Submitting Author has the right to grant and does grant on behalf of all authors of the Work (as defined in the below author licence), an exclusive licence and/or a non-exclusive licence for contributions from authors who are: i) UK Crown employees; ii) where BMJ has agreed a CC-BY licence shall apply, and/or iii) in accordance with the terms applicable for US Federal Government officers or employees acting as part of their official duties; on a worldwide, perpetual, irrevocable, royalty-free basis to BMJ Publishing Group Ltd ("BMJ") its licensees and where the relevant Journal is co-owned by BMJ to the co-owners of the Journal, to publish the Work in this journal and any other BMJ products and to exploit all rights, as set out in our [licence](#).

The Submitting Author accepts and understands that any supply made under these terms is made by BMJ to the Submitting Author unless you are acting as an employee on behalf of your employer or a postgraduate student of an affiliated institution which is paying any applicable article publishing charge ("APC") for Open Access articles. Where the Submitting Author wishes to make the Work available on an Open Access basis (and intends to pay the relevant APC), the terms of reuse of such Open Access shall be governed by a Creative Commons licence – details of these licences and which [Creative Commons](#) licence will apply to this Work are set out in our licence referred to above.

Other than as permitted in any relevant BMJ Author's Self Archiving Policies, I confirm this Work has not been accepted for publication elsewhere, is not being considered for publication elsewhere and does not duplicate material already published. I confirm all authors consent to publication of this Work and authorise the granting of this licence.

# Anxiety and Depression among Type-II Diabetes Patients Visiting Diabetes Clinics of Pokhara Metropolitan, Nepal

Shishir Paudel<sup>1</sup>, Shankar Prasad Khanal<sup>2</sup>, Sujan Gautam<sup>1</sup>, Anisha Chalise<sup>3</sup>, Tara Nath Koirala<sup>4</sup>, Sujan Babu Marahatta<sup>1</sup>

<sup>1</sup> Department of Public Health, Manmohan Memorial Institute of Health Sciences, Kathmandu, Nepal

<sup>2</sup> Central Department of Statistics, Tribhuvan University, Kathmandu, Nepal

<sup>3</sup> Center for Research on Environment Health & Population Activities (CREHPA), Kusunti, Lalitpur, Nepal

<sup>4</sup> Pokhara Super Speciality Health Clinic, Consultant Endocrinologist, Pokhara, Nepal

| Authors                                       | Institution Affiliation                                                                             |
|-----------------------------------------------|-----------------------------------------------------------------------------------------------------|
| 1 <sup>st</sup> Author: Shishir Paudel        | Department of Public Health, Manmohan Memorial Institute of Health Sciences, Kathmandu, Nepal       |
| 2 <sup>nd</sup> Author: Shankar Prasad Khanal | Central Department of Statistics, Tribhuvan University, Kathmandu, Nepal                            |
| 3 <sup>rd</sup> Author: Sujan Gautam          | Department of Public Health, Manmohan Memorial Institute of Health Sciences, Kathmandu, Nepal       |
| 4 <sup>th</sup> Author: Anisha Chalise        | Center for Research on Environment Health & Population Activities(CREHPA), Kusunti, Lalitpur, Nepal |
| 5 <sup>th</sup> Author : Tara Nath Koirala    | Pokhara Super Speciality Health Clinic, Consultant Endocrinologist, Pokhara, Nepal                  |
| 6 <sup>th</sup> Author : Sujan Babu Marahatta | Department of Public Health, Manmohan Memorial Institute of Health Sciences, Kathmandu, Nepal       |

## CORRESPONDING AUTHOR:

Name: Sujan Babu Marahatta

Email: [sujan@nou.edu.np](mailto:sujan@nou.edu.np)

Contact no: +977-9851126707

Address: Kathmandu, Nepal

**Words Counts: 3,208** (excluding title page, abstract, references, and tables)

**Number of tables: 5**

## ABSTRACT

**Objectives:** To estimate the prevalence of anxiety and depression and identify their risk factors among Type-II Diabetes patients visiting diabetes clinics of Pokhara Metropolitan, Nepal.

**Design:** Cross-sectional study.

**Setting:** Diabetes clinics of Pokhara Metropolitan, Nepal; From May to July, 2021.

**Participants:** 283 T2DM patients visiting selected diabetes centers of Pokhara Metropolitan.

**Main Outcome Measures:** Anxiety and Depression.

**Methods:** Face-to-face interview was conducted using a structured questionnaire consisting information related to participants' socio-demographic profile, and several factors along with Hospital Anxiety and Depression-anxiety subscale (HADS-A) and Patient Health Questionnaire (PHQ-9) to assess the level of anxiety and depression respectively. Pearson's chi-square tests and binary logistic regression were performed to examine association between dependent and independent variables at 5% level of significance and crude and adjusted odds ratio were reported.

**Results:** The prevalence of anxiety and depression was noted among 31.4% (95% CI: 26.2%-37.5%) and 36.4% (95% CI: 30.8%-42.0%) of T2DM patients respectively. Anxiety was found to be associated with lower level of perceived social support (AOR:2.442, 95% CI:1.020-5.845), multiple complications (AOR:2.758, 95% CI:1.015-7.334), and comorbidities (AOR:2.110, 95% CI:1.004-4.436), severe COVID-19 fear (AOR:2.343, 95% CI:1.123-4.887), and sleep dissatisfaction (AOR:1.912, 95% CI:1.073-3.047). Likewise, economical dependency (AOR:1.890, 95% CI:1.026-3.482), no insurance (AOR:2.973, 95% CI:1.134-7.093), lower perceived social support (AOR:2.883, 95% CI:1.158-7.181), multiple complications (AOR:2.308, 95% CI:1.585-6.422), and comorbidities (AOR:2.575, 95% CI:1.180-5.617), severe COVID-19 fear (AOR:2.117, 95% CI:1.009-4.573), alcohol use (AOR:2.401, 95% CI:1.199-4.806), and sleep dissatisfaction (AOR:1.995, 95% CI:1.093-3.644) were found to be associated with depression.

**Conclusion:** This study showed a high prevalence of anxiety as well as depression among T2DM patients. Strengthening social support and focusing on diabetes patients suffering from comorbidity and complications could reduce their risk of mental health problems.

**Keywords:** Anxiety, Depression, Type 2 Diabetes, Prevalence, Risk Factors, Psychological distress

### Strengths and Limitations of this Study

- This is one of the few studies that has assessed the prevalence and risk factors of anxiety among people living with Type-II diabetes mellitus
- The study used recognized screening tools to assess the level of anxiety, depression, and level of perceived social support
- Although the study was performed in the largest Metropolitan City of Nepal, the prevalence of anxiety and depression reported in this study might be slightly higher than the actual prevalence present at the community level, as this was a health institution-based study.

### INTRODUCTION

Diabetes mellitus is a systemic disease that affects various body systems causing blindness, kidney failure, and lower limb amputation as its long-term complications.<sup>[1-3]</sup> The global prevalence of diabetes was estimated at 9.3% in the year 2019 with a prediction that globally 578 million people will have diabetes by the year 2030.<sup>[4]</sup> Its prevalence has been rising rapidly in low and middle-income countries than that of high-income countries.<sup>[5]</sup> In Nepal, the World Health Organization diabetes country profile, 2016 estimated the prevalence of diabetes at 9.1%.<sup>[6]</sup> Furthermore, a systematic review from 2021 based on publications from 2000-2020, noted the pooled prevalence of type-II diabetes (T2DM) in Nepal at 10% with a higher prevalence observed in studies published between the year 2015-2020 at 11.24%.<sup>[7]</sup>

Mental distress is an emotional state which manifests with a range of depression, anxiety, panic, or somatic symptoms such as sleep problems, headache, and backache.<sup>[8]</sup> Globally, the prevalence of psychological distress mostly depression and anxiety disorders are higher among people living with diabetes as compared to those without diabetes.<sup>[9-11]</sup> A systematic review estimated the global prevalence of depression among T2DM patients at 28%, where Asia has the highest rate of depression at 32%.<sup>[12]</sup> Similarly, another systematic review observed generalized anxiety disorder to be present in 14% of T2DM patients.<sup>[13]</sup> In Nepal, a cross-sectional study performed among T2DM patients attending tertiary care center in Kathmandu valley found the rate of depression at 40.3% in the year 2013.<sup>[14]</sup> Similarly, a study published in 2019 revealed the prevalence of depression to be at 22.7% among T2DM patients in community settings of Duhabi-Bhaluwa Municipality of Sunsari District. <sup>[15]</sup>

1  
2  
3 Diabetes care mainly consists of self-care aimed to prevent acute and chronic complications. The  
4 person living with diabetes is responsible to balance their food intake, physical activities and  
5 monitor blood glucose level as much as possible.<sup>[16]</sup> Mental health complications, mostly anxiety  
6 and depression complicates living with diabetes and its management in several ways. Presence of  
7 depression and anxiety could worsen the prognosis of diabetes by reducing patients' ability for  
8 self-care and increasing non-compliance to treatments while increasing risk of serious short- and  
9 long-term complications such as blindness, amputations, stroke, decreased quality of life, and even  
10 premature death.<sup>[16-19]</sup> Additionally, serious anxiety disorders largely overlap with symptoms of  
11 hypoglycemia which requires immediate treatment but the diabetes patient might fail to  
12 differentiate whether the feelings are of anxiety or hypoglycemia. The preexisting anxiety of  
13 injections or blood draws might lead to panic disorders or patients' refusal to monitor their glucose  
14 level.<sup>[20]</sup> Similarly, fear of hypoglycemia, a common source of anxiety and depression for diabetic  
15 persons, can lead patients to maintain blood glucose levels above target levels.<sup>[20]</sup> Even in-current  
16 context of COVID-19 pandemic, diabetes patients are taken as one of the vulnerable populations  
17 at risk of infection and mortality. There are higher concerns stressed over the mental health and  
18 wellbeing of this vulnerable population.<sup>[21, 22]</sup>

19  
20  
21  
22  
23  
24  
25  
26  
27  
28  
29  
30  
31 The promotion of mental health and well-being is one of the priorities of the sustainable  
32 development goals, yet the health care professionals involved in prevention and treatment of  
33 diabetes lack training to address the mental health aspects of diabetes patients. Thus, diagnosis of  
34 depression and anxiety among diabetes patients is often missed, leading to severe consequences  
35 on patients' health and quality of life. There is a lack of plentiful information about the rates of  
36 anxiety and depression among diabetes patients as well as its associated risk factors in South Asia  
37 and particularly in Nepal because of the limited studies published to date considering the mental  
38 health perspective of diabetes patients. For that reason, this study aimed to assess the prevalence  
39 and factors associated with anxiety and depression among type-II diabetes patients visiting  
40 diabetes clinics of Pokhara Metropolitan, one of the rapidly urbanizing cities of Nepal with an  
41 expectation that the study could provide some valuable insights over mental health issues of  
42 diabetes patients in developing nations similar to Nepal.

## METHODS AND MATERIALS

### Study Design

This was a health facility-based cross-sectional study executed among type-II diabetes patients residing at Pokhara Metropolitan who visited the selected healthcare institutions between May and July 2021.

### Participants

All type-II diabetes mellitus patients with at least six months of history of diagnosis, attending the selected diabetes clinics were eligible to be included, while T2DM patients who were not the residents of Pokhara Metropolitan for at least past six months from the date of data collection were excluded.

### Sample Size Determination and Sampling Technique

The sample size was determined using the formula for estimation of a proportion, since our major outcome variables were prevalence of anxiety and depression. A community-based cross-sectional study conducted in the eastern part of Nepal reported the prevalence of depression among T2DM patients to be 22.7%.<sup>[15]</sup> So, using this past prevalence at 5% allowable error and 95% confidence interval, the initially estimated sample size was 264 T2DM patients which was optimized to 291 after adjusting 10% non-response rate.

Two government health institutions (Urban Health Promotion Center and Shishuwa Hospital) and one private clinic (Pokhara Super Speciality Health Clinic) were selected purposively. Urban Health Promotion Center and Shishuwa Hospital are the primary contact points for Social Health Insurance and provide free diabetes-related services as well as referral services. Thus, these are some of the most sought government institutions with an estimated 250-300 T2DM patients visiting monthly. Pokhara Super Speciality Health Clinic is one of the well-known tertiary endocrine referral centers of Pokhara with an average of 500 diabetes patients visiting monthly. The T2DM patients visiting these three healthcare institutions were selected randomly using the technique based on systematic random sampling. For this, every  $k^{\text{th}}$  patient ( $800/291=2.74\approx 3$ ) i.e. 3<sup>rd</sup> patient waiting in the queue on the day of data collection were enrolled as a participant. If the selected patient refused to participate or fell under exclusion criteria, then the patient next in the queue was approached for participation.



## Data Collection

Face-to-face interview technique was used for data collection. The T2DM patients meeting inclusion criteria were approached and provided with the study details. The informed consent was acquired and after his/her approval, the interview was performed. Considering the privacy of the participants Pokhara Super Speciality Health Clinic provided the researcher with a separate room next to the doctors' cabin, while a small private space was provided at the corner of the doctors' cabin and in the waiting area in Urban Health Promotion Center and Shishuwa Hospital where the patients were directed for data collection.

The data was collected using a set of closed-ended questions consisting of three sections. The first section consisted of questions regarding the socio-demographic profile of the participants including Multidimensional Scale of Perceived Social Support (MSPSS)<sup>[23]</sup> translated in Nepali language (MSPSS-N)<sup>[24]</sup> intending to measure level of perceived social support. Second section consisted of questions regarding the patients' health conditions, diabetes-related attributes and lifestyle-related factors including COVID-19 related variables such as COVID-19 status, vaccination and fear associated with COVID-19 based on a modification of Fear scale of COVID-19<sup>[25]</sup>. Third section consisted of a nine-item Patient Health Questionnaire (PHQ-9)<sup>[26]</sup> to measure the level of depression followed by Hospital Anxiety and Depression Scale-anxiety subscale (HADS-A)<sup>[27]</sup> to measure the level of anxiety.

The PHQ-9 consists of nine items measuring depressive symptoms corresponding to diagnostic criteria for major depressive disorder. Each item was scored on a four-point Likert scale (0–3) with scores ranging from 0 to 27, with higher scores reflecting greater depression severity.<sup>[26]</sup> The PHQ-9 has been translated in Nepali language and has shown a sensitivity of 0.94 and specificity of 0.80 to measure depression at the cutoff of  $\geq 10$ .<sup>[28]</sup> The HADS-A consist of seven items measuring anxiety symptoms. Each item is scored on a four-point Likert scale (0-3) with total scores ranging from 0 to 21 with higher scores reflecting greater anxiety and cutoff point of  $\geq 8$  illustrating anxiety.<sup>[27]</sup> The HADS has been validated in Nepali language where HADS-A subscale was found to have a good internal consistency with Cronbach's alpha of 0.76.<sup>[29]</sup>

## Data Processing, Management and Analysis

The collected data were entered in EpiData 3.1 and exported to Statistical Package for Social Sciences (SPSS) version 22 for statistical analysis. The data were summarized in terms of

frequencies and proportions. Bivariate analysis was carried out by applying Chi-square ( $\chi^2$ ) tests to identify the factors associated with anxiety and depression at 95% Confidence Interval (CI) and 5% level of significance i.e. p-value <0.05. The variables found to be significant in bivariate analysis were considered for multivariate analysis using binary logistic regression to determine the adjusted effect of each factor on the dependent variable. Prior to multivariate regression analysis, the multi-collinearity between the independent variables was tested using the Variance Inflation Factor (VIF) test. The Hosmer-Lemeshow test (HL test) for goodness-of-fit was also performed.

### Ethical Considerations

The ethical approval for this study was obtained from Institutional Review Committee of Manmohan Memorial Institute of Health Science (Registration no: MMIHS-IRC 583). Written informed consent was obtained from all the participants before conducting the study and all the information was kept confidential.

### Patient and Public Involvement

There was no patient and public involvement in the design, or conduct, or reporting, or dissemination plans of our research. The randomly sampled diabetes patients were involved as participants once during the time of data collection after acquiring their informed consent.

### RESULTS

A total of 291 T2DM patients were approached for data collection, of which 283 provided complete responses to all the questions, while eight participants left in the middle of the data collection. Thus, the response rate of 97.25% for all questions was acquired and 283 total samples were analyzed for this study. The prevalence of anxiety and depression was noted among 31.4% and 36.4% of T2DM patients respectively (Table 1). Moreover, around one-third (36%) of the participants reported to have experienced suicidal ideation in past two weeks on PHQ-9 of which six participants (2.1%) reported experiencing suicidal ideation nearly every single day.

Table 1: Prevalence of Anxiety and Depression (n=283)

| Outcome               | n (%)      | 95% CI      | Outcome                  | n (%)      | 95% CI       |
|-----------------------|------------|-------------|--------------------------|------------|--------------|
| <b>Anxiety Status</b> |            |             | <b>Depression Status</b> |            |              |
| Present               | 89 (31.4)  | 26.2%-37.5% | Present                  | 103 (36.4) | 30.8%-42.0%  |
| Absent                | 194 (68.6) | 62.5%-73.8% | Absent                   | 180 (63.6) | 58.0%-69.2%  |
| <b>Anxiety Level</b>  |            |             | <b>Depression Level</b>  |            |              |
| No Anxiety            | 194 (68.6) | 62.5%-73.8% | No Depression            | 180 (63.6) | 57.6 %-68.6% |

|                  |           |             |                     |           |             |
|------------------|-----------|-------------|---------------------|-----------|-------------|
| Mild Anxiety     | 62 (21.9) | 16.6%-27.2% | Mild Depression     | 71 (25.1) | 20.1%-30.7% |
| Moderate Anxiety | 19 (6.7)  | 3.9%-9.9%   | Moderate Depression | 22 (7.8)  | 4.6%-11.0%  |
| Severe Anxiety   | 8 (2.8)   | 1.1%-5.3%   | Severe Depression   | 10 (3.5)  | 1.8%-5.7%   |

In bivariate analysis, participants' family type, living companionship and perceived level of social support were the only socio-demographic factors found to be associated with anxiety, whereas, living companionship, economic dependency, insurance coverage diabetes care, and perceived level of social support were the only socio-demographic factors found to be associated with depression at 5% level of significance (Table 2).

Table 2. Association of socio-demographic variables with Anxiety and Depression (n=283)

| Socio-demographic variables     | n (%)      | Anxiety       |              | p-value | Depression    |              | p-value |
|---------------------------------|------------|---------------|--------------|---------|---------------|--------------|---------|
|                                 |            | Presence n(%) | Absence n(%) |         | Presence n(%) | Absence n(%) |         |
| <b>Age group</b>                |            |               |              |         |               |              |         |
| <40 years                       | 30 (10.6)  | 11 (36.7)     | 19 (63.3)    | 0.800   | 13 (43.3)     | 17 (56.7)    | 0.125   |
| 40-60                           | 65 (23.0)  | 19 (29.2)     | 46 (70.8)    |         | 16 (24.6)     | 49 (75.4)    |         |
| 50-60                           | 77 (27.2)  | 22 (28.6)     | 55 (71.4)    |         | 28 (36.4)     | 49 (63.6)    |         |
| ≥60 years                       | 111 (39.2) | 37 (33.3)     | 74 (66.7)    |         | 46 (41.4)     | 65 (58.6)    |         |
| <b>Gender</b>                   |            |               |              |         |               |              |         |
| Male                            | 161 (56.9) | 54 (33.5)     | 107 (66.5)   | 0.384   | 59 (36.6)     | 102 (63.4)   | 0.920   |
| Female                          | 122 (43.1) | 35 (28.7)     | 87 (71.3)    |         | 44 (36.1)     | 78 (63.9)    |         |
| <b>Ethnicity</b>                |            |               |              |         |               |              |         |
| Brahmin/Chhetri                 | 107 (37.8) | 42 (39.3)     | 65 (60.7)    | 0.175   | 38 (35.5)     | 69 (64.5)    | 0.409   |
| Janajaties                      | 122 (43.1) | 33 (27.0)     | 89 (73.0)    |         | 44 (36.1)     | 78 (63.9)    |         |
| Dalit                           | 33 (11.7)  | 9 (27.3)      | 24 (72.7)    |         | 10 (30.3)     | 23 (69.7)    |         |
| Religious Minorities            | 21 (7.4)   | 5 (23.8)      | 16 (76.2)    |         | 11 (52.4)     | 10 (47.6)    |         |
| <b>Type of Family</b>           |            |               |              |         |               |              |         |
| Nuclear                         | 143 (50.5) | 53 (37.1)     | 90 (62.9)    | 0.040   | 59 (41.3)     | 84 (58.7)    | 0.086   |
| Joint/ Extended                 | 140 (49.4) | 36 (25.7)     | 104 (74.3)   |         | 44 (31.4)     | 96 (68.6)    |         |
| <b>Living companion</b>         |            |               |              |         |               |              |         |
| Living alone                    | 24 (8.5)   | 13 (55.2)     | 11 (45.8)    | 0.012   | 15 (62.5)     | 9 (37.5)     | 0.008   |
| Living with family              | 259 (91.5) | 76 (29.6)     | 181 (70.4)   |         | 88 (34.0)     | 171 (66.0)   |         |
| <b>Marital Status</b>           |            |               |              |         |               |              |         |
| Married                         | 232 (82.0) | 72 (31.0)     | 160 (69.0)   | 0.489   | 78 (33.6)     | 154 (66.4)   | 0.065   |
| Unmarried/Divorced              | 13 (4.6)   | 6 (46.2)      | 7 (53.8)     |         | 8 (61.5)      | 5 (38.5)     |         |
| Widow/ Widower                  | 38 (13.4)  | 11 (28.9)     | 27 (71.1)    |         | 17 (44.7)     | 21 (55.3)    |         |
| <b>Education</b>                |            |               |              |         |               |              |         |
| Illiterate                      | 49 (17.3)  | 15 (30.6)     | 34 (69.4)    | 0.391   | 21 (42.9)     | 28 (57.1)    | 0.298   |
| Literate by Informal Education  | 42 (14.8)  | 17 (40.5)     | 25 (59.5)    |         | 18 (43.0)     | 24 (57.0)    |         |
| Literate by Formal Education    | 192 (67.8) | 57 (29.7)     | 135 (70.3)   |         | 64 (33.3)     | 128 (66.7)   |         |
| <b>Economic Dependency</b>      |            |               |              |         |               |              |         |
| Dependent                       | 121 (42.8) | 41 (33.9)     | 80 (66.1)    | 0.446   | 55 (45.5)     | 66 (54.5)    | 0.006   |
| Independent                     | 162 (57.2) | 48 (29.6)     | 114 (70.4)   |         | 48 (29.6)     | 114 (70.4)   |         |
| <b>Health insurance</b>         |            |               |              |         |               |              |         |
| Full coverage                   | 42 (14.8)  | 9 (21.4)      | 33 (78.6)    | 0.287   | 8 (19.0)      | 34 (81.0)    | 0.004   |
| Partial coverage                | 86 (30.4)  | 27 (31.4)     | 59 (68.6)    |         | 26 (30.2)     | 60 (69.8)    |         |
| No insurance                    | 155 (54.8) | 53 (34.2)     | 102 (65.8)   |         | 69 (44.5)     | 85 (55.5)    |         |
| <b>Perceived social support</b> |            |               |              |         |               |              |         |

|                  |            |           |           |                  |           |           |                  |
|------------------|------------|-----------|-----------|------------------|-----------|-----------|------------------|
| Low support      | 41 (14.5)  | 20 (48.8) | 21 (51.2) | <b>&lt;0.001</b> | 25 (61.0) | 16 (39.0) | <b>&lt;0.001</b> |
| Moderate Support | 130 (45.9) | 48 (36.9) | 82 (63.1) |                  | 51 (39.2) | 79 (60.8) |                  |
| High Support     | 112 (39.6) | 21 (18.8) | 91 (81.3) |                  | 27 (24.1) | 85 (75.9) |                  |

In context of health and lifestyle-related factors, insulin use, presence of complications and comorbidities, prior history of clinically diagnosed mental distress, fear associated with COVID-19, alcohol use and sleep satisfaction were found to be associated with both anxiety and depression status at  $p < 0.05$ . In addition, depression was also found to be associated with the difficulty experienced by T2DM patients to follow dietary recommendations and use of tobacco products. (Table 3). The T2DM patients experiencing anxiety were found to be twice more likely to be depressed (UOR: 2.758, 95% CI:1.641-4.635) in bivariate analysis (Table 4).

Table 3: Association of Health and Lifestyle related variables with Anxiety and Depression (n=283)

| Health and Lifestyle related variables       | n (%)      | Anxiety       |              | p-value          | Depression    |              | p-value          |
|----------------------------------------------|------------|---------------|--------------|------------------|---------------|--------------|------------------|
|                                              |            | Presence n(%) | Absence n(%) |                  | Presence n(%) | Absence n(%) |                  |
| <b>Duration of Illness</b>                   |            |               |              |                  |               |              |                  |
| ≤ 4 Years                                    | 152 (53.7) | 45 (29.6)     | 107 (70.4)   | 0.472            | 49 (32.2)     | 103 (67.8)   | 0.117            |
| >4 years                                     | 131 (46.3) | 44 (33.6)     | 87 (66.4)    |                  | 54 (41.2)     | 77 (58.8)    |                  |
| <b>Use of Insulin</b>                        |            |               |              |                  |               |              |                  |
| Yes                                          | 33 (12.0)  | 17 (51.5)     | 16 (48.5)    | <b>0.008</b>     | 20 (60.6)     | 13 (39.4)    | <b>0.002</b>     |
| No                                           | 250 (88.0) | 72 (28.8)     | 178 (71.2)   |                  | 83 (33.2)     | 167 (66.8)   |                  |
| <b>Presence of Complications</b>             |            |               |              |                  |               |              |                  |
| None                                         | 212 (74.9) | 53 (25.0)     | 159 (75.0)   | <b>&lt;0.001</b> | 63 (29.7)     | 149 (70.3)   | <b>&lt;0.001</b> |
| Single complications                         | 47 (16.6)  | 23 (48.9)     | 24 (51.1)    |                  | 26 (55.3)     | 21 (44.7)    |                  |
| Two or more                                  | 24 (8.5)   | 13 (54.2)     | 11 (45.8)    |                  | 14 (58.3)     | 10 (41.7)    |                  |
| <b>Presence of Comorbidities</b>             |            |               |              |                  |               |              |                  |
| None                                         | 126 (44.5) | 24 (19.0)     | 102 (81.0)   | <b>&lt;0.001</b> | 28 (22.2)     | 98 (77.8)    | <b>&lt;0.001</b> |
| Single comorbidity                           | 84 (29.7)  | 32 (38.1)     | 52 (61.9)    |                  | 35 (41.7)     | 49 (58.3)    |                  |
| Two or more                                  | 73 (25.8)  | 33 (45.2)     | 40 (54.8)    |                  | 40 (54.8)     | 33 (45.2)    |                  |
| <b>Difficulty following recommended diet</b> |            |               |              |                  |               |              |                  |
| Too difficult                                | 63 (22.3)  | 24 (38.1)     | 39 (61.9)    | 0.430            | 34 (54.0)     | 29 (46.0)    | <b>&lt;0.001</b> |
| A bit difficult                              | 100 (35.3) | 29 (30.6)     | 71 (69.4)    |                  | 37 (34.0)     | 63 (66.0)    |                  |
| Not difficult at all                         | 120 (42.4) | 36 (30.0)     | 84 (70.0)    |                  | 32 (26.7)     | 88 (73.3)    |                  |
| <b>History of Mental illness</b>             |            |               |              |                  |               |              |                  |
| Yes                                          | 16 (5.7)   | 9 (56.3)      | 7 (43.8)     | <b>0.028</b>     | 10 (62.5)     | 6 (37.5)     | <b>0.025</b>     |
| No                                           | 267 (94.3) | 80 (30.0)     | 187 (70.0)   |                  | 93 (34.8)     | 174 (65.2)   |                  |
| <b>Ever tested for COVID-19</b>              |            |               |              |                  |               |              |                  |
| Tested Negative                              | 31 (11.0)  | 14 (45.2)     | 17 (54.8)    | 0.186            | 9 (29.0)      | 18 (64.3)    | 0.654            |
| Tested Positive                              | 28 (9.9)   | 7 (25.0)      | 21 (75.0)    |                  | 10 (35.7)     | 22 (71.0)    |                  |
| Never Tested                                 | 224 (79.1) | 68 (30.4)     | 156 (69.6)   |                  | 84 (37.5)     | 140 (62.5)   |                  |
| <b>COVID-19 Vaccine</b>                      |            |               |              |                  |               |              |                  |
| Complete vaccination                         | 28 (9.9)   | 11 (39.3)     | 17 (60.7)    | 0.605            | 9 (32.1)      | 19 (67.9)    | 0.285            |
| Incomplete vaccine                           | 65 (23.0)  | 21 (32.3)     | 44 (67.7)    |                  | 29 (44.6)     | 36 (55.4)    |                  |
| Didn't receive vaccine                       | 190 (67.1) | 57 (30.0)     | 133 (70.0)   |                  | 65 (34.2)     | 125 (65.8)   |                  |
| <b>COVID-19 Fear</b>                         |            |               |              |                  |               |              |                  |
| Low Fear                                     | 105 (37.1) | 22 (21.0)     | 83 (79.0)    | <b>0.006</b>     | 27 (25.7)     | 78 (74.3)    | <b>0.013</b>     |

|                           |            |           |            |                  |           |            |                  |
|---------------------------|------------|-----------|------------|------------------|-----------|------------|------------------|
| Moderate fear             | 96 (33.9)  | 32 (33.3) | 64 (66.7)  |                  | 39 (40.6) | 57 (59.4)  |                  |
| Severe Fear               | 82 (29.0)  | 35 (42.7) | 47 (57.3)  |                  | 37 (45.1) | 45 (54.9)  |                  |
| <b>Alcohol Use</b>        |            |           |            |                  |           |            |                  |
| Yes                       | 75 (26.5)  | 31 (41.3) | 44 (58.7)  | <b>0.033</b>     | 39 (52.0) | 36 (48.0)  | <b>0.001</b>     |
| No                        | 208 (73.5) | 58 (27.9) | 150 (72.1) |                  | 64 (30.8) | 144 (69.2) |                  |
| <b>Tobacco Use</b>        |            |           |            |                  |           |            |                  |
| Yes                       | 55 (19.4)  | 22 (41.8) | 32 (58.2)  | 0.065            | 27 (49.1) | 28 (50.9)  | <b>0.029</b>     |
| No                        | 228 (80.6) | 66 (28.9) | 162 (71.1) |                  | 76 (33.3) | 152 (66.7) |                  |
| <b>Sleep Satisfaction</b> |            |           |            |                  |           |            |                  |
| Satisfied                 | 180 (63.6) | 45 (25.0) | 135 (75.0) | <b>0.002</b>     | 52 (28.9) | 128 (71.1) | <b>0.001</b>     |
| Not satisfied             | 103 (36.4) | 44 (42.7) | 59 (57.3)  |                  | 51 (49.5) | 52 (50.5)  |                  |
| <b>Depression</b>         |            |           |            |                  |           |            |                  |
| Present                   | 103 (36.4) | 47 (45.6) | 56 (54.4)  | <b>&lt;0.001</b> | -         | -          | -                |
| Absent                    | 180 (63.6) | 42 (23.2) | 138 (76.7) |                  | -         | -          |                  |
| <b>Anxiety</b>            |            |           |            |                  |           |            |                  |
| Present                   | 89 (31.4)  | -         | -          | -                | 47 (52.8) | 42 (47.2)  | <b>&lt;0.001</b> |
| Absent                    | 194 (68.6) | -         | -          |                  | 56 (28.9) | 138 (71.1) |                  |

For multivariate analysis, the Variance Inflation Factor (VIF) test among the independent variables was performed where the highest reported VIF was 1.610 so there was no issue of multicollinearity. Lower level of perceived social support (AOR:2.442, 95% CI:1.020-5.845), presence of single (AOR:2.081, 95% CI:1.002-4.414) and multiple complications (AOR:2.758, 95% CI:1.015-7.334), presence of single comorbidity (AOR:2.127, 95% CI:1.059-4.272) and multiple comorbidities (AOR:2.110, 95% CI:1.004-4.436), severe fear of COVID-19 infection (AOR:2.343, 95% CI:1.123-4.887), and sleep dissatisfaction (AOR:1.912, 95% CI:1.073-3.047) were found to be the independent predictors of anxiety (Table 4).

Table 4: Independent predictors of anxiety among the diabetes patients (n=283)

| Factors                                  | UOR   | 95% CI      | p-value          | AOR <sup>a</sup> | 95% CI      | p-value      |
|------------------------------------------|-------|-------------|------------------|------------------|-------------|--------------|
| <b>Type of Family</b>                    |       |             |                  |                  |             |              |
| Nuclear                                  | 1.701 | 1.023-2.829 | <b>0.041</b>     | 1.458            | 0.784-2.711 | 0.233        |
| Joint/ Extended                          | Ref   |             |                  | Ref              |             |              |
| <b>Living companion</b>                  |       |             |                  |                  |             |              |
| Living alone                             | 2.846 | 1.221-6.633 | <b>0.015</b>     | 1.108            | 0.405-3.034 | 0.842        |
| Living with family                       | Ref   |             |                  | Ref              |             |              |
| <b>Perceived level of social support</b> |       |             |                  |                  |             |              |
| Low support                              | 4.127 | 1.902-8.955 | <b>&lt;0.001</b> | 2.442            | 1.020-5.845 | <b>0.045</b> |
| Moderate Support                         | 2.537 | 1.401-4.591 | <b>0.002</b>     | 1.839            | 0.986-3.520 | 0.060        |
| High Support                             | Ref   |             |                  | Ref              |             |              |
| <b>Use of Insulin</b>                    |       |             |                  |                  |             |              |
| Yes                                      | 2.627 | 1.259-5.481 | <b>0.010</b>     | 1.299            | 0.565-3.166 | 0.565        |
| No                                       | Ref   |             |                  | Ref              |             |              |
| <b>Presence of Complications</b>         |       |             |                  |                  |             |              |
| None                                     | Ref   |             |                  | Ref              |             |              |
| Single complications                     | 2.875 | 1.499-5.512 | <b>0.001</b>     | 2.081            | 1.002-4.414 | <b>0.049</b> |
| Two or more                              | 3.545 | 1.501-8.387 | <b>0.004</b>     | 2.758            | 1.015-7.334 | <b>0.044</b> |
| <b>Presence of Comorbidities</b>         |       |             |                  |                  |             |              |

|                                  |       |             |                  |       |             |              |
|----------------------------------|-------|-------------|------------------|-------|-------------|--------------|
| None                             | Ref   |             |                  | Ref   |             |              |
| Single comorbidity               | 2.615 | 1.399-4.890 | <b>0.003</b>     | 2.127 | 1.059-4.272 | <b>0.034</b> |
| Two or more                      | 3.506 | 1.848-6.652 | <b>&lt;0.001</b> | 2.110 | 1.004-4.436 | <b>0.048</b> |
| <b>History of Mental illness</b> |       |             |                  |       |             |              |
| Yes                              | 3.005 | 1.082-8.350 | <b>0.035</b>     | 2.132 | 0.680-6.687 | 0.194        |
| No                               | Ref   |             |                  | Ref   |             |              |
| <b>COVID-19 Fear</b>             |       |             |                  |       |             |              |
| Low Fear                         | Ref   |             |                  | Ref   |             |              |
| Moderate fear                    | 1.886 | 1.001-3.553 | <b>0.049</b>     | 1.491 | 0.731-3.039 | 0.272        |
| Severe Fear                      | 2.809 | 1.478-5.340 | <b>0.002</b>     | 2.343 | 1.123-4.887 | <b>0.023</b> |
| <b>Alcohol Use</b>               |       |             |                  |       |             |              |
| Yes                              | 1.822 | 1.051-3.160 | <b>0.033</b>     | 1.639 | 0.881-3.047 | 0.119        |
| No                               | Ref   |             |                  | Ref   |             |              |
| <b>Sleep Satisfaction</b>        |       |             |                  |       |             |              |
| Satisfied                        | Ref   |             |                  | Ref   |             |              |
| Not satisfied                    | 2.237 | 1.335-3.748 | <b>0.002</b>     | 1.912 | 1.073-3.047 | <b>0.028</b> |
| <b>Depression</b>                |       |             |                  |       |             |              |
| Present                          | 2.758 | 1.641-4.635 | <b>&lt;0.001</b> |       |             |              |
| Absent                           | Ref   |             |                  | -     | -           | -            |

<sup>a</sup> Logistic regression model adjusted for all variables in the table except Depression, Nagelkerker R Square 0.310; Hosmer Lemeshow Chi-square 9.793,  $p=0.280$

CI: confidence interval, UOR: Unadjusted odds ratio, AOR: Adjusted odds ratio

In context of Depression, economical dependency (AOR:1.890, 95% CI:1.026-3.482), lower level of perceived social support (AOR:2.883, 95% CI:1.158-7.181), no insurance coverage (AOR:2.973, 95% CI:1.134-7.093), presence of multiple complications (AOR:2.308, 95% CI:1.585-6.422), presence of single comorbidity (AOR:2.262, 95% CI:1.108-4.619), and multiple comorbidities (AOR:2.575, 95% CI:1.180-5.617), difficulty following recommended diet (AOR:2.387, 95% CI:1.100-5.182), severe fear of COVID-19 (AOR:2.117, 95% CI:1.009-4.573), alcohol use (AOR:2.401, 95% CI:1.199-4.806), and sleep dissatisfaction (AOR:1.995, 95% CI:1.093-3.644) were found as the independent predictors for depression (Table 5).

Table 5: Independent predictors of depression among the diabetes patients (n=283)

| Factors                                  | UOR   | 95% CI       | p-value          | AOR <sup>a</sup> | 95% CI      | p-value      |
|------------------------------------------|-------|--------------|------------------|------------------|-------------|--------------|
| <b>Living companion</b>                  |       |              |                  |                  |             |              |
| Living alone                             | 3.239 | 1.363-7.695  | <b>0.008</b>     | 1.586            | 0.553-4.548 | 0.391        |
| Living with family                       | Ref   |              |                  | Ref              |             |              |
| <b>Economic Dependency</b>               |       |              |                  |                  |             |              |
| Dependent                                | 1.979 | 1.210-3.236  | <b>0.007</b>     | 1.890            | 1.026-3.482 | <b>0.041</b> |
| Independent                              | Ref   |              |                  | Ref              |             |              |
| <b>Perceived level of social support</b> |       |              |                  |                  |             |              |
| Low support                              | 4.919 | 2.295-10.543 | <b>&lt;0.001</b> | 2.883            | 1.158-7.181 | <b>0.023</b> |
| Moderate Support                         | 2.032 | 1.163-3.551  | <b>0.013</b>     | 1.345            | 0.696-2.599 | 0.379        |
| High Support                             | Ref   |              |                  | Ref              |             |              |
| <b>Use of Insulin</b>                    |       |              |                  |                  |             |              |
| Yes                                      | 3.095 | 1.468-6.528  | <b>0.003</b>     | 1.265            | 0.905-3.171 | 0.061        |



|                                              |       |             |                  |       |             |              |
|----------------------------------------------|-------|-------------|------------------|-------|-------------|--------------|
| No                                           | Ref   |             |                  | Ref   |             |              |
| <b>Presence of Complications</b>             |       |             |                  |       |             |              |
| None                                         | Ref   |             |                  | Ref   |             |              |
| Single complications                         | 2.928 | 1.535-5.587 | <b>0.010</b>     | 1.628 | 0.739-3.587 | 0.227        |
| Two or more                                  | 3.311 | 1.397-7.851 | <b>0.007</b>     | 2.308 | 1.858-6.422 | <b>0.046</b> |
| <b>Presence of Comorbidities</b>             |       |             |                  |       |             |              |
| None                                         | Ref   |             |                  | Ref   |             |              |
| Single comorbidity                           | 2.500 | 1.367-4.573 | <b>0.003</b>     | 2.262 | 1.108-4.619 | <b>0.025</b> |
| Two or more                                  | 4.242 | 2.274-7.915 | <b>&lt;0.001</b> | 2.575 | 1.180-5.617 | <b>0.017</b> |
| <b>Health insurance coverage</b>             |       |             |                  |       |             |              |
| Full coverage                                | Ref   |             |                  | Ref   |             |              |
| Partial coverage                             | 1.842 | 0.751-4.517 | 0.182            | 1.792 | 0.613-4.691 | 0.287        |
| No insurance                                 | 3.410 | 1.483-7.842 | <b>0.004</b>     | 2.973 | 1.134-7.093 | <b>0.027</b> |
| <b>Difficulty following recommended diet</b> |       |             |                  |       |             |              |
| Too difficult                                | 3.224 | 1.701-6.112 | <b>&lt;0.001</b> | 2.387 | 1.100-5.182 | <b>0.028</b> |
| A bit difficult                              | 1.615 | 1.005-2.865 | <b>0.046</b>     | 1.112 | 0.555-2.230 | 0.764        |
| Not difficult at all                         | Ref   |             |                  | Ref   |             |              |
| <b>History of Mental illness</b>             |       |             |                  |       |             |              |
| Yes                                          | 3.118 | 1.099-8.848 | <b>0.033</b>     | 2.587 | 0.835-9.025 | 0.139        |
| No                                           | Ref   |             |                  | Ref   |             |              |
| <b>COVID-19 Fear</b>                         |       |             |                  |       |             |              |
| Low Fear                                     | Ref   |             |                  | Ref   |             |              |
| Moderate fear                                | 1.977 | 1.087-3.594 | <b>0.025</b>     | 1.496 | 0.731-3.060 | 0.270        |
| Severe Fear                                  | 2.375 | 1.282-4.402 | <b>0.006</b>     | 2.117 | 1.009-4.573 | <b>0.042</b> |
| <b>Alcohol Use</b>                           |       |             |                  |       |             |              |
| Yes                                          | 2.437 | 1.420-4.184 | <b>0.001</b>     | 2.401 | 1.199-4.806 | <b>0.013</b> |
| No                                           | Ref   |             |                  | Ref   |             |              |
| <b>Tobacco Use</b>                           |       |             |                  |       |             |              |
| Yes                                          | 1.929 | 1.063-3.500 | <b>0.031</b>     | 1.001 | 0.461-2.174 | 0.998        |
| No                                           | Ref   |             |                  | Ref   |             |              |
| <b>Sleep Satisfaction</b>                    |       |             |                  |       |             |              |
| Satisfied                                    | Ref   |             |                  | Ref   |             |              |
| Not satisfied                                | 2.414 | 1.460-3.993 | <b>0.001</b>     | 1.995 | 1.093-3.644 | <b>0.025</b> |

<sup>a</sup> Logistic regression model adjusted for all variables in the table except Anxiety; Nagelkerker R Square 0.358; Hosmer Lemeshow Chi-square 10.073, p=0.260

CI: confidence interval, UOR: Unadjusted odds ratio, AOR: Adjusted odds ratio

## DISCUSSION

In this study, the prevalence of anxiety and depression among T2DM patients were 31.4% and 36.4% respectively. This rate of prevalence is slightly lower than a recent study conducted among T2DM patients admitted in the tertiary hospital at Chitwan district in 2019 where anxiety and depression were reported among 57.8% and 49.7% of the participants.<sup>[30]</sup> This variation in anxiety and depression might be due to the fact that the past study was conducted in hospital-admitted patients. The current prevalence of depression is in line with past prevalence observed among patients visiting diabetes centers in Lalitpur Metropolitan in 2019 where 35.6% of diabetes patients

1  
2  
3 were found to have depression.<sup>[31]</sup> However, past community-based study from the Dubabi-  
4 Bhaluwa Municipality reported a lower prevalence (22.7%) of depression in the year 2016. <sup>[15]</sup>  
5 These variations in the prevalence might be due to the difference in geographic location, study  
6 settings and time factors.  
7  
8  
9

10 There was a statistically significant relationship existing between the perceived level of social  
11 support and patients' anxiety and depression status, as the patients with lower level of perceived  
12 social support had twice the odds of anxiety and depression. Similar findings were shared by  
13 studies from Saudi Arabia and Ethiopia where higher odds of anxiety and depression were seen in  
14 patients with lower social support. <sup>[32, 33]</sup> As good social support has been observed as a protective  
15 factor for anxiety and depression, studies suggest that strengthening social support in patients can  
16 improve their psychological wellbeing.<sup>[34, 35]</sup> Social support plays an important role in management  
17 of diabetes. Having poor social support may lead to delay in healthcare-seeking behavior as well  
18 as increased emotional distress. <sup>[32, 33, 36]</sup> This might further inflect an undesirable effect on both  
19 physical and mental wellbeing of the patients. Thus, social support in diabetes patients could be  
20 strengthened to reduce the risk of mental distress which could be done through frequent  
21 engagement of family members at diabetes care settings and formation of peer support groups at  
22 the diabetes centers as well as at community levels.  
23  
24  
25  
26  
27  
28  
29  
30  
31  
32

33 In this study, the presence of comorbidities as well as complications related to diabetes were found  
34 to be important predictors for anxiety and depression among T2DM patients. This is in line with  
35 past study from Nepal where diabetes patients with comorbid conditions had twice the odds of  
36 depression.<sup>[37]</sup> Likewise, a study from Ethiopia observed that patients worried about diabetes  
37 complications had 6.49 folds increase in odds of depression.<sup>[38]</sup> Similarly, patients with a history  
38 of diabetes-related complications were found to have higher odds of anxiety in Mexico.<sup>[39]</sup> Studies  
39 from different parts of the world suggest that, greater the number of additional illnesses present  
40 among T2DM patients, greater is the risk of anxiety and depression.<sup>[15, 40, 41]</sup> Presence of  
41 comorbidity and/or complication creates an additional financial burden due to increased treatment  
42 cost, physical burden and chronic pain as well as social burden among the T2DM patients. <sup>[15, 41,</sup>  
43 <sup>42]</sup> Thus, these might be the contributing factors to impact patients' psychological wellbeing as we  
44 also found that economic dependency and absence of health insurance securities were other risk  
45 factors for depression among this vulnerable group. Special care should be provided to diabetes  
46  
47  
48  
49  
50  
51  
52  
53  
54  
55  
56  
57  
58  
59  
60



1  
2  
3 patients suffering from complications and co-morbid conditions and should be provided with  
4 certain financial protection, proper health counseling and routine mental health screening services.  
5  
6

7 In bivariate analysis, we observed that insulin users have twice the odds of experiencing anxiety  
8 and thrice the odds of depression as compared to patients who don't have to use insulin. Similar  
9 observations were shared by past studies from Nepal where one study noted insulin users to have  
10 twice the odds of depression as compared to oral medicine users and another study found a nine-  
11 fold increase in depression as compared to non-insulin users.<sup>[15, 43]</sup> Insulin therapy not only  
12 involves painful injections and regular glucose measurement, but also is perceived to be used in  
13 severe cases. This perception might influence psychological distress among insulin users.<sup>[9, 15, 44,</sup>  
14 <sup>45]</sup> However, in multivariate analyses this statistical relationship between insulin use and both  
15 anxiety and depression were ruled out in our study. This might be because a small proportion of  
16 insulin users were enumerated by chance in our random sample.  
17  
18  
19  
20  
21  
22  
23  
24

25 We observed that the participants who were not satisfied with the duration and quality of their  
26 sleep had almost twice the odds of being anxious and depressed than those who were satisfied with  
27 their sleep. Similar to this finding, a study from China observed that diabetes patients with poor  
28 sleep quality had almost twice the odds of anxiety and depression.<sup>[46]</sup> Short sleep duration could  
29 influence psychological distress even in the general population. Diabetes patients suffer from  
30 frequent urination which might affect their quality of sleep and sleep satisfaction, leading to  
31 discomfort, agitation and stress in long run.<sup>[41]</sup>  
32  
33  
34  
35  
36  
37

38 The severe fear of COVID-19 infection was found to be associated with both anxiety and  
39 depression. A study from Germany noted diabetes patients tend to perceive a higher susceptibility  
40 of COVID-19 infection, think more about its severe course, and even death from COVID-19 than  
41 non-diabetes population. However, the same study revealed that there was no increase in anxiety  
42 and depressive symptoms among individuals with diabetes.<sup>[47]</sup> As COVID-19 is an emerging  
43 public health concern with limited understanding about its psychological impact on patients with  
44 chronic illness who are deemed as a vulnerable group, there is a need for further studies for a better  
45 understanding of its association with psychological wellbeing among these vulnerable populations.  
46  
47  
48  
49  
50  
51  
52  
53  
54  
55  
56  
57  
58  
59  
60

## Limitations

Despite being one of the few studies to assess the status and risk factors for Anxiety and Depression among type-II diabetes mellitus patients in Nepal, this study is not free from its limitations. Anxiety and depression in this study were assessed through the PHQ-9 and HADS-Anxiety Subscale, which are screening tools. Thus, cross-verification of anxiety and depression from psychiatrists might be a limitation of this study. As this study was a health institution-based study, the prevalence of anxiety and depression might be slightly higher than the actual prevalence present at the community level.

## CONCLUSION

The study revealed nearly one-third of the type-II diabetes patients experienced anxiety of varying severity, whereas, nearly two-fifths experienced depressive symptoms. Among the various factors, level of perceived social support, presence of comorbidity and complications, severe fear of COVID-19 infection, and sleep dissatisfaction were the associated risk factors for both anxiety and depression. There is a need to integrate mental health counseling services with present diabetes-related care and support systems to ease patients' physiological wellbeing. Further studies based on qualitative perspective could provide valuable insights over the way social supports and other associated factors are influencing the mental wellbeing of this vulnerable population.

## ACKNOWLEDGEMENT

We thank all the participants for their valuable time and information. We are grateful to Pokhara Super Speciality Health Clinic, Urban Health Promotion Center and Shishuwa Hospital for their approval and support in data collection. We express our gratitude to Dr. Jasmina Gurung, Dr. Anjali Bhandari, and Mrs. Nirjala Paudel for providing a supportive environment at the time of data collection.

## AUTHOR CONTRIBUTIONS

SP: as the primary investigator, lead the conceptualization of the study, questionnaire development, collected the data, performed preliminary analysis and developed and finalized the manuscript. SBM, SPK and SG: contributed to the manuscript's conceptualization, analysis and interpretation of the findings and supervised the study. AC: contributed in data collection and

analysis, editing and revision of the whole manuscript. TNK: contributed in data collection and review of the manuscript. All authors read and approved the final manuscript.

## ETHICAL APPROVAL

The ethical approval for this study was obtained from Institutional Review Committee of Manmohan Memorial Institute of Health Science (Registration no: MMIHS-IRC 583).

## FUNDING SOURCE

None declared.

## COMPETING INTERESTS

None declared.

## DATA SHARING

The dataset generated and analyzed during the current study are available from the corresponding author upon reasonable request.

## REFERENCES

1. American Diabetes Association. Diagnosis and classification of diabetes mellitus. *Diabetes Care*. 2009;32: S62-S7. doi: [10.2337/dc09-S062](https://doi.org/10.2337/dc09-S062). PMID: [PMC2613584](https://pubmed.ncbi.nlm.nih.gov/19111111/)
2. Saedi E, Gheini MR, Faiz F, Arami MA. Diabetes mellitus and cognitive impairments. *World J Diabetes*. 2016;7(17):412-22. doi: [10.4239/wjd.v7.i17.412](https://doi.org/10.4239/wjd.v7.i17.412). PMID: [27660698](https://pubmed.ncbi.nlm.nih.gov/27660698/)
3. World Health Organization. Diabetes. Key facts. 2018. Available from: [www.who.int/news-room/fact-sheets/detail/diabetes](http://www.who.int/news-room/fact-sheets/detail/diabetes).
4. International Diabetes Federation. Diabetes Atlas reports 463 million with diabetes 2019. Available from: <https://idf.org/news/169:diabetes-atlas-reports-463-million-with-diabetes.html>.
5. World Health Organization. The top 10 causes of death 2020. Available from: <https://www.who.int/news-room/fact-sheets/detail/the-top-10-causes-of-death>.
6. World Health Organization. Diabetes country profile of Nepal 2016. Available from: [https://www.who.int/diabetes/country-profiles/npl\\_en.pdf](https://www.who.int/diabetes/country-profiles/npl_en.pdf).
7. Shrestha DB, Budhathoki P, Sedhai YR, Marahatta A, Lamichhane S, Nepal S, et al. Type 2 Diabetes Mellitus in Nepal from 2000 to 2020: A systematic review and meta-analysis [version 1; peer review: 3 approved with reservations]. *F1000Res*. 2021;10 :543. doi: [10.12688/f1000research.53970.2](https://doi.org/10.12688/f1000research.53970.2). PMID: [34621512](https://pubmed.ncbi.nlm.nih.gov/34621512/)
8. de Waal MWM, Arnold IA, Spinhoven P, Eekhof JAH, van Hemert AM. The reporting of specific physical symptoms for mental distress in general practice. *J Psychosom Res*. 2005;59(2):89-95. doi:[10.1016/j.jpsychores.2005.02.011](https://doi.org/10.1016/j.jpsychores.2005.02.011). PMID:16186004
9. Anderson RJ, Freedland KE, Clouse RE, Lustman PJ. The prevalence of comorbid depression in adults with diabetes: a meta-analysis. *Diabetes care*. 2001;24(6):1069-78. doi:[10.2337/diacare.24.6.1069](https://doi.org/10.2337/diacare.24.6.1069). PMID:11375373

10. Rotella F, Mannucci E. Diabetes mellitus as a risk factor for depression. A meta-analysis of longitudinal studies. *Diabetes Res Clin Pract.* 2013;99(2):98-104. doi:[10.1016/j.diabres.2012.11.022](https://doi.org/10.1016/j.diabres.2012.11.022). PMID:23265924
11. Lin EH, Von Korff M, Alonso J, Angermeyer MC, Anthony J, Bromet E, et al. Mental disorders among persons with diabetes--results from the World Mental Health Surveys. *J Psychosom Res.* 2008;65(6):571-80. doi:[10.1016/j.jpsychores.2008.06.007](https://doi.org/10.1016/j.jpsychores.2008.06.007). PMID:[PMCID:PMC3672403](https://pubmed.ncbi.nlm.nih.gov/163672403/)
12. Khaledi M, Haghghatdoost F, Feizi A, Aminorroaya A. The prevalence of comorbid depression in patients with type 2 diabetes: an updated systematic review and meta-analysis on huge number of observational studies. *Acta Diabetol.* 2019;56(6):631-50. doi:[10.1007/s00592-019-01295-9](https://doi.org/10.1007/s00592-019-01295-9). PMID:30903433
13. Grigsby AB, Anderson RJ, Freedland KE, Clouse RE, Lustman PJ. Prevalence of anxiety in adults with diabetes: a systematic review. *J Psychosom Res.* 2002;53(6):1053-60. doi:[10.1016/s0022-3999\(02\)00417-8](https://doi.org/10.1016/s0022-3999(02)00417-8). PMID:12479986
14. Niraula K, Kohrt BA, Flora MS, Thapa N, Mumu SJ, Pathak R, et al. Prevalence of depression and associated risk factors among persons with type-2 diabetes mellitus without a prior psychiatric history: a cross-sectional study in clinical settings in urban Nepal. *BMC Psychiatry.* 2013;13(1):309. doi:[10.1186/1471-244X-13-309](https://doi.org/10.1186/1471-244X-13-309). PMID:[PMCID:PMC3833646](https://pubmed.ncbi.nlm.nih.gov/23833646/)
15. Sunny AK, Khanal VK, Sah RB, Ghimire A. Depression among people living with type 2 diabetes in an urbanizing community of Nepal. *PloS one.* 2019;14(6):e0218119. doi:[10.1371/journal.pone.0218119](https://doi.org/10.1371/journal.pone.0218119). PMID:[PMCID:PMC6557519](https://pubmed.ncbi.nlm.nih.gov/316557519/)
16. Schram MT, Baan CA, Pouwer F. Depression and quality of life in patients with diabetes: a systematic review from the European depression in diabetes (EDID) research consortium. *Curr Diabetes Rev.* 2009;5(2):112-9. doi:[10.2174/157339909788166828](https://doi.org/10.2174/157339909788166828). PMID:[PMCID:PMC2764861](https://pubmed.ncbi.nlm.nih.gov/182764861/)
17. Ducat L, Rubenstein A, Philipson LH, Anderson BJ. A Review of the Mental Health Issues of Diabetes Conference. *Diabetes Care.* 2015;38(2):333-8. doi:[10.2337/dc14-1383](https://doi.org/10.2337/dc14-1383). PMID:[PMCID:PMC4302262](https://pubmed.ncbi.nlm.nih.gov/24302262/)
18. Egede LE, Nietert PJ, Zheng D. Depression and all-cause and coronary heart disease mortality among adults with and without diabetes. *Diabetes care.* 2005;28(6):1339-45. doi:[10.2337/diacare.28.6.1339](https://doi.org/10.2337/diacare.28.6.1339). PMID:15920049
19. Gonzalez JS, Peyrot M, McCarl LA, Collins EM, Serpa L, Mimiaga MJ, et al. Depression and diabetes treatment nonadherence: a meta-analysis. *Diabetes care.* 2008;31(12):2398-403. doi:[10.2337/dc08-1341](https://doi.org/10.2337/dc08-1341). PMID:[PMCID:PMC2584202](https://pubmed.ncbi.nlm.nih.gov/182584202/)
20. Ducat L, Philipson LH, Anderson BJ. The mental health comorbidities of diabetes. *JAMA.* 2014;312(7):691-2. doi:[10.1001/jama.2014.8040](https://doi.org/10.1001/jama.2014.8040). PMID:[PMCID:PMC4439400](https://pubmed.ncbi.nlm.nih.gov/24439400/)
21. Alessi J, de Oliveira GB, Franco DW, Brino do Amaral B, Becker AS, Knijnik CP, et al. Mental health in the era of COVID-19: prevalence of psychiatric disorders in a cohort of patients with type 1 and type 2 diabetes during the social distancing. *Diabetol Metabo Syndr.* 2020;12(1):76. doi:[10.1186/s13098-020-00584-6](https://doi.org/10.1186/s13098-020-00584-6). PMID:[PMCID:PMC7457442](https://pubmed.ncbi.nlm.nih.gov/317457442/)
22. Chalise A, Paudel S. Mental Health Concern during COVID-19 Pandemic in Nepal. *Europasian Journal of Medical Sciences.* 2020;2(0). doi:[10.46405/ejms.v2i2.87](https://doi.org/10.46405/ejms.v2i2.87)
23. Zimet GD, Dahlem NW, Zimet SG, Farley GK. The Multidimensional Scale of Perceived Social Support. *J Pers Assess.* 1988;52(1):30-41. doi:[10.1207/s15327752jpa5201\\_2](https://doi.org/10.1207/s15327752jpa5201_2)

- 1  
2  
3  
4  
5  
6  
7  
8  
9  
10  
11  
12  
13  
14  
15  
16  
17  
18  
19  
20  
21  
22  
23  
24  
25  
26  
27  
28  
29  
30  
31  
32  
33  
34  
35  
36  
37  
38  
39  
40  
41  
42  
43  
44  
45  
46  
47  
48  
49  
50  
51  
52  
53  
54  
55  
56  
57  
58  
59  
60
24. Tonsing K, Zimet GD, Tse S. Assessing social support among South Asians: The multidimensional scale of perceived social support. *Asian J Psychiatr.* 2012;5(2):164-8. doi:[10.1016/j.ajp.2012.02.012](https://doi.org/10.1016/j.ajp.2012.02.012). PMID:22813661
  25. Ahorsu DK, Lin C-Y, Imani V, Saffari M, Griffiths MD, Pakpour AH. The Fear of COVID-19 Scale: Development and Initial Validation. *Int J Ment Health Addict.* 2020:1-9. doi: [10.1007/s11469-020-00270-8](https://doi.org/10.1007/s11469-020-00270-8). PMID:[PMC7100496](https://pubmed.ncbi.nlm.nih.gov/32811469/)
  26. Kroenke K, Spitzer RL, Williams JB. The PHQ-9: validity of a brief depression severity measure. *J Gen Intern Med.* 2001;16(9):606-13. doi: [10.1046/j.1525-1497.2001.016009606.x](https://doi.org/10.1046/j.1525-1497.2001.016009606.x). PMID:[PMC1495268](https://pubmed.ncbi.nlm.nih.gov/116009606/)
  27. Zigmond AS, Snaith RP. The hospital anxiety and depression scale. *Acta Psychiatr Scand.* 1983;67(6):361-70. doi:[10.1111/j.1600-0447.1983.tb09716.x](https://doi.org/10.1111/j.1600-0447.1983.tb09716.x). PMID: 6880820
  28. Kohrt BA, Luitel NP, Acharya P, Jordans MJ. Detection of depression in low resource settings: validation of the Patient Health Questionnaire (PHQ-9) and cultural concepts of distress in Nepal. *BMC Psychiatry.* 2016;16:58. doi: [10.1186/s12888-016-0768-y](https://doi.org/10.1186/s12888-016-0768-y). PMID: [PMC4782581](https://pubmed.ncbi.nlm.nih.gov/2782581/)
  29. Risal A, Manandhar K, Linde M, Koju R, Steiner TJ, Holen A. Reliability and Validity of a Nepali-language Version of the Hospital Anxiety and Depression Scale (HADS). *Kathmandu Univ Med J (KUMJ).* 2015;13(50):115-24. doi: [10.3126/kumj.v13i2.16783](https://doi.org/10.3126/kumj.v13i2.16783). PMID: 26657079
  30. Sharma K, Dhungana G, Adhikari S, Bista Pandey A, Sharma M. Depression and Anxiety among Patients with Type II Diabetes Mellitus in Chitwan Medical College Teaching Hospital, Nepal. *Nurs Res Practice.* 2021;2021:8846915. doi: [10.1155/2021/8846915](https://doi.org/10.1155/2021/8846915). PMID: [PMC7817292](https://pubmed.ncbi.nlm.nih.gov/37817292/)
  31. Thapa S, Lamichhane N, Mishra DK. Depression among People Living with Type II Diabetes in Kathmandu Valley of Nepal: A CrossSectional Study. *Int J Health Sci Res.* 2019;9(11):10-7.
  32. Al-Mohaimed AA. Prevalence and factors associated with anxiety and depression among type 2 diabetes in Qassim: A descriptive cross-sectional study. *J Taibah Univ Med Sci.* 2017;12(5):430-6. doi: [10.1016/j.jtumed.2017.04.002](https://doi.org/10.1016/j.jtumed.2017.04.002). PMID: [PMC6694910](https://pubmed.ncbi.nlm.nih.gov/36694910/)
  33. Engidaw NA, Wubetu AD, Basha EA. Prevalence of depression and its associated factors among patients with diabetes mellitus at Tirunesh-Beijing general hospital, Addis Ababa, Ethiopia. *BMC Public Health.* 2020;20(1):266. doi: [10.1186/s12889-020-8360-2](https://doi.org/10.1186/s12889-020-8360-2). PMID: [PMC7036239](https://pubmed.ncbi.nlm.nih.gov/37036239/)
  34. Wu SF, Young LS, Yeh FC, Jian YM, Cheng KC, Lee MC. Correlations among social support, depression, and anxiety in patients with type-2 diabetes. *J Nurs Res:* 2013;21(2):129-38. doi:[10.1097/jnr.0b013e3182921fe1](https://doi.org/10.1097/jnr.0b013e3182921fe1). PMID: 23681349
  35. Zhang W, Xu H, Zhao S, Yin S, Wang X, Guo J, et al. Prevalence and influencing factors of co-morbid depression in patients with type 2 diabetes mellitus: a General Hospital based study. *Diabetol Metab Syndr.* 2015;7:60. doi:[10.1186/s13098-015-0053-0](https://doi.org/10.1186/s13098-015-0053-0). PMID:[PMC4499190](https://pubmed.ncbi.nlm.nih.gov/24499190/)
  36. Ramkisson S, Pillay BJ, Sibanda W. Social support and coping in adults with type 2 diabetes. *Afr J Prim Health Care Fam Med.* 2017;9(1):e1-e8. doi: [10.4102/phcfm.v9i1.1405](https://doi.org/10.4102/phcfm.v9i1.1405). PMID: [PMC5566130](https://pubmed.ncbi.nlm.nih.gov/25566130/)
  37. Pahari DP, Upadhyay R, Sharma CK. Depression among diabetic patients visiting a diabetes center in Nepal. *Health Prospect: Journal of Public Health.* 2018;17:21-5.



- 1  
2  
3 38. Abate TW, Gedamu H. Psychosocial and clinical factors associated with depression among  
4 individuals with diabetes in Bahir Dar City Administrative, Northwest Ethiopia. *Ann Gen*  
5 *Psychiatry*. 2020;19:18. doi:[10.1186/s12991-020-00267-6](https://doi.org/10.1186/s12991-020-00267-6). PMID:[PMC70 65366](https://pubmed.ncbi.nlm.nih.gov/3356343/)  
6  
7 39. Tovilla-Zarate C, Juarez-Rojop I, Peralta Jimenez Y, Jimenez MA, Vazquez S, Bermudez-  
8 Ocana D, et al. Prevalence of anxiety and depression among outpatients with type 2  
9 diabetes in the Mexican population. *PloS One*. 2012;7(5):e36887. doi:  
10 [10.1371/journal.pone.0036887](https://doi.org/10.1371/journal.pone.0036887). PMID: [PMC3356343](https://pubmed.ncbi.nlm.nih.gov/3356343/)  
11  
12 40. Sweileh WM, Abu-Hadeed HM, Al-Jabi SW, Zyoud SH. Prevalence of depression among  
13 people with type 2 diabetes mellitus: a cross sectional study in Palestine. *BMC Public*  
14 *Health*. 2014;14:163. doi: [10.1186/1471-2458-14-163](https://doi.org/10.1186/1471-2458-14-163). PMID: [PMC3929146](https://pubmed.ncbi.nlm.nih.gov/3929146/)  
15  
16 41. Qiu S, Sun H, Liu Y, Kanu JS, Li R, Yu Y, et al. Prevalence and correlates of psychological  
17 distress among diabetes mellitus adults in the Jilin province in China: a cross-sectional  
18 study. *PeerJ*. 2017;5:e2869. doi: [10.7717/peerj.2869](https://doi.org/10.7717/peerj.2869). PMID: [PMC5244878](https://pubmed.ncbi.nlm.nih.gov/5244878/)  
19  
20 42. Raval A, Dhanaraj E, Bhansali A, Grover S, Tiwari P. Prevalence and determinants of  
21 depression in type 2 diabetes patients in a tertiary care centre. *Indian J Med Res*.  
22 2010;132:195-200. PMID:20716820  
23  
24 43. Joshi S, Dhungana RR, Subba UK. Illness Perception and Depressive Symptoms among  
25 Persons with Type 2 Diabetes Mellitus: An Analytical Cross-Sectional Study in Clinical  
26 Settings in Nepal. *J Diabetes Res*. 2015;2015:908374. doi:[10.1155/2015/908374](https://doi.org/10.1155/2015/908374).  
27 PMID: [PMC4508465](https://pubmed.ncbi.nlm.nih.gov/4508465/)  
28  
29 44. Ali S, Stone MA, Peters JL, Davies MJ, Khunti K. The prevalence of co-morbid depression  
30 in adults with Type 2 diabetes: a systematic review and meta-analysis. *Diabetic Med*.  
31 2006;23(11):1165-73. doi: [10.1111/j.1464-5491.2006.01943.x](https://doi.org/10.1111/j.1464-5491.2006.01943.x). PMID:17054590  
32  
33 45. Salinero-Fort MA, Gomez-Campelo P, San Andres-Rebollo FJ, Cardenas-Valladolid J,  
34 Abanades-Herranz JC, Carrillo de Santa Pau E, et al. Prevalence of depression in patients  
35 with type 2 diabetes mellitus in Spain (the DIADEMA Study) : results from the  
36 MADIABETES cohort. *BMJ Open*. 2018;8(9):e020768. doi: [10.1136/bmjopen-2017-](https://doi.org/10.1136/bmjopen-2017-020768)  
37 [020768](https://doi.org/10.1136/bmjopen-2017-020768). PMID:[PMC6157517](https://pubmed.ncbi.nlm.nih.gov/6157517/)  
38  
39 46. Sun N, Lou P, Shang Y, Zhang P, Wang J, Chang G, et al. Prevalence and determinants of  
40 depressive and anxiety symptoms in adults with type 2 diabetes in China: a cross-sectional  
41 study. *BMJ Open*. 2016;6(8):e012540. doi:[10.1136/bmjopen-2016-012540](https://doi.org/10.1136/bmjopen-2016-012540).  
42 PMID:[PMC5013513](https://pubmed.ncbi.nlm.nih.gov/5013513/)  
43  
44 47. Musche V, Kohler H, Bäuerle A, Schweda A, Weismüller B, Fink M, et al. COVID-19-  
45 Related Fear, Risk Perception, and Safety Behavior in Individuals with Diabetes.  
46 *Healthcare*. 2021;9(4):480. doi:[10.3390/healthcare9040480](https://doi.org/10.3390/healthcare9040480). PMID: [PMC8072870](https://pubmed.ncbi.nlm.nih.gov/8072870/)  
47  
48  
49  
50  
51  
52  
53  
54  
55  
56  
57  
58  
59

STROBE Statement—Checklist of items that should be included in reports of *cross-sectional studies*

|                              | Item No | Recommendation                                                                                                                                                                                    | Page No |
|------------------------------|---------|---------------------------------------------------------------------------------------------------------------------------------------------------------------------------------------------------|---------|
| <b>Title and abstract</b>    | 1       | (a) Indicate the study's design with a commonly used term in the title or the abstract                                                                                                            | 1,2     |
|                              |         | (b) Provide in the abstract an informative and balanced summary of what was done and what was found                                                                                               | 2       |
| <b>Introduction</b>          |         |                                                                                                                                                                                                   |         |
| Background/rationale         | 2       | Explain the scientific background and rationale for the investigation being reported                                                                                                              | 3,4     |
| Objectives                   | 3       | State specific objectives, including any prespecified hypotheses                                                                                                                                  | 4       |
| <b>Methods</b>               |         |                                                                                                                                                                                                   |         |
| Study design                 | 4       | Present key elements of study design early in the paper                                                                                                                                           | 5       |
| Setting                      | 5       | Describe the setting, locations, and relevant dates, including periods of recruitment, exposure, follow-up, and data collection                                                                   | 5       |
| Participants                 | 6       | (a) Give the eligibility criteria, and the sources and methods of selection of participants                                                                                                       | 5       |
| Variables                    | 7       | Clearly define all outcomes, exposures, predictors, potential confounders, and effect modifiers. Give diagnostic criteria, if applicable                                                          | 6       |
| Data sources/<br>measurement | 8*      | For each variable of interest, give sources of data and details of methods of assessment (measurement). Describe comparability of assessment methods if there is more than one group              | 6       |
| Bias                         | 9       | Describe any efforts to address potential sources of bias                                                                                                                                         | 7       |
| Study size                   | 10      | Explain how the study size was arrived at                                                                                                                                                         | 5       |
| Quantitative variables       | 11      | Explain how quantitative variables were handled in the analyses. If applicable, describe which groupings were chosen and why                                                                      | 6,7     |
| Statistical methods          | 12      | (a) Describe all statistical methods, including those used to control for confounding                                                                                                             | 7       |
|                              |         | (b) Describe any methods used to examine subgroups and interactions                                                                                                                               |         |
|                              |         | (c) Explain how missing data were addressed                                                                                                                                                       | 7       |
|                              |         | (d) If applicable, describe analytical methods taking account of sampling strategy                                                                                                                |         |
|                              |         | (e) Describe any sensitivity analyses                                                                                                                                                             |         |
| <b>Results</b>               |         |                                                                                                                                                                                                   |         |
| Participants                 | 13*     | (a) Report numbers of individuals at each stage of study—eg numbers potentially eligible, examined for eligibility, confirmed eligible, included in the study, completing follow-up, and analysed | 7       |
|                              |         | (b) Give reasons for non-participation at each stage                                                                                                                                              |         |
|                              |         | (c) Consider use of a flow diagram                                                                                                                                                                |         |
| Descriptive data             | 14*     | (a) Give characteristics of study participants (eg demographic, clinical, social) and information on exposures and potential confounders                                                          | 7,8,9   |
|                              |         | (b) Indicate number of participants with missing data for each variable of interest                                                                                                               | 7       |
| Outcome data                 | 15*     | Report numbers of outcome events or summary measures                                                                                                                                              | 7,8,9   |

|    |                          |    |                                                                           |
|----|--------------------------|----|---------------------------------------------------------------------------|
| 1  |                          |    |                                                                           |
| 2  | Main results             | 16 | (a) Give unadjusted estimates and, if applicable, confounder-adjusted     |
| 3  |                          |    | estimates and their precision (eg, 95% confidence interval). Make clear   |
| 4  |                          |    | which confounders were adjusted for and why they were included            |
| 5  |                          |    |                                                                           |
| 6  |                          |    | (b) Report category boundaries when continuous variables were             |
| 7  |                          |    | categorized                                                               |
| 8  |                          |    |                                                                           |
| 9  |                          |    | (c) If relevant, consider translating estimates of relative risk into     |
| 10 |                          |    | absolute risk for a meaningful time period                                |
| 11 | Other analyses           | 17 | Report other analyses done—eg analyses of subgroups and                   |
| 12 |                          |    | interactions, and sensitivity analyses                                    |
| 13 |                          |    |                                                                           |
| 14 | <b>Discussion</b>        |    |                                                                           |
| 15 | Key results              | 18 | Summarise key results with reference to study objectives                  |
| 16 | Limitations              | 19 | Discuss limitations of the study, taking into account sources of          |
| 17 |                          |    | potential bias or imprecision. Discuss both direction and magnitude of    |
| 18 |                          |    | any potential bias                                                        |
| 19 |                          |    |                                                                           |
| 20 | Interpretation           | 20 | Give a cautious overall interpretation of results considering objectives, |
| 21 |                          |    | limitations, multiplicity of analyses, results from similar studies, and  |
| 22 |                          |    | other relevant evidence                                                   |
| 23 |                          |    |                                                                           |
| 24 | Generalisability         | 21 | Discuss the generalisability (external validity) of the study results     |
| 25 |                          |    |                                                                           |
| 26 | <b>Other information</b> |    |                                                                           |
| 27 | Funding                  | 22 | Give the source of funding and the role of the funders for the present    |
| 28 |                          |    | study and, if applicable, for the original study on which the present     |
| 29 |                          |    | article is based                                                          |
| 30 |                          |    |                                                                           |

31 \*Give information separately for exposed and unexposed groups.

32  
33  
34 **Note:** An Explanation and Elaboration article discusses each checklist item and gives methodological background and  
35 published examples of transparent reporting.  
36  
37  
38  
39  
40  
41  
42  
43  
44  
45  
46  
47  
48  
49  
50  
51  
52  
53  
54  
55  
56  
57  
58  
59  
60



# BMJ Open

## Anxiety and Depression among People with Type 2 Diabetes Visiting Diabetes Clinics of Pokhara Metropolitan, Nepal: A Cross-sectional Study

|                                 |                                                                                                                                                                                                                                                                                                                                                                                                                                                                                                                                                                                                                                            |
|---------------------------------|--------------------------------------------------------------------------------------------------------------------------------------------------------------------------------------------------------------------------------------------------------------------------------------------------------------------------------------------------------------------------------------------------------------------------------------------------------------------------------------------------------------------------------------------------------------------------------------------------------------------------------------------|
| Journal:                        | <i>BMJ Open</i>                                                                                                                                                                                                                                                                                                                                                                                                                                                                                                                                                                                                                            |
| Manuscript ID                   | bmjopen-2022-064490.R1                                                                                                                                                                                                                                                                                                                                                                                                                                                                                                                                                                                                                     |
| Article Type:                   | Original research                                                                                                                                                                                                                                                                                                                                                                                                                                                                                                                                                                                                                          |
| Date Submitted by the Author:   | 08-Dec-2022                                                                                                                                                                                                                                                                                                                                                                                                                                                                                                                                                                                                                                |
| Complete List of Authors:       | Paudel, Shishir; Manmohan Memorial Institute of Health Sciences, Department of Public Health<br>Khanal, Shankar; Tribhuvan University, Central Department of Statistics<br>Gautam, Sujana; Manmohan Memorial Institute of Health Sciences, Department of Public Health<br>Chalise, Anisha; Tribhuvan University Institute of Medicine, Central Department of Public Health; Center for Research on Environment Health & Population Activities (CREHPA)<br>Koirala, Tara ; Pokhara Super Speciality Health Clinic<br>Marahatta, Sujana; Manmohan Memorial Institute of Health Sciences, Department of Public Health; Nepal Open University, |
| <b>Primary Subject Heading</b>: | Mental health                                                                                                                                                                                                                                                                                                                                                                                                                                                                                                                                                                                                                              |
| Secondary Subject Heading:      | Diabetes and endocrinology, Epidemiology, Public health                                                                                                                                                                                                                                                                                                                                                                                                                                                                                                                                                                                    |
| Keywords:                       | Anxiety disorders < PSYCHIATRY, Depression & mood disorders < PSYCHIATRY, DIABETES & ENDOCRINOLOGY, MENTAL HEALTH                                                                                                                                                                                                                                                                                                                                                                                                                                                                                                                          |
|                                 |                                                                                                                                                                                                                                                                                                                                                                                                                                                                                                                                                                                                                                            |

SCHOLARONE™  
Manuscripts



I, the Submitting Author has the right to grant and does grant on behalf of all authors of the Work (as defined in the below author licence), an exclusive licence and/or a non-exclusive licence for contributions from authors who are: i) UK Crown employees; ii) where BMJ has agreed a CC-BY licence shall apply, and/or iii) in accordance with the terms applicable for US Federal Government officers or employees acting as part of their official duties; on a worldwide, perpetual, irrevocable, royalty-free basis to BMJ Publishing Group Ltd ("BMJ") its licensees and where the relevant Journal is co-owned by BMJ to the co-owners of the Journal, to publish the Work in this journal and any other BMJ products and to exploit all rights, as set out in our [licence](#).

The Submitting Author accepts and understands that any supply made under these terms is made by BMJ to the Submitting Author unless you are acting as an employee on behalf of your employer or a postgraduate student of an affiliated institution which is paying any applicable article publishing charge ("APC") for Open Access articles. Where the Submitting Author wishes to make the Work available on an Open Access basis (and intends to pay the relevant APC), the terms of reuse of such Open Access shall be governed by a Creative Commons licence – details of these licences and which [Creative Commons](#) licence will apply to this Work are set out in our licence referred to above.

Other than as permitted in any relevant BMJ Author's Self Archiving Policies, I confirm this Work has not been accepted for publication elsewhere, is not being considered for publication elsewhere and does not duplicate material already published. I confirm all authors consent to publication of this Work and authorise the granting of this licence.

# Anxiety and Depression among People with Type 2 Diabetes Visiting Diabetes Clinics of Pokhara Metropolitan, Nepal: A Cross-sectional Study

Shishir Paudel<sup>1</sup>, Shankar Prasad Khanal<sup>2</sup>, Sujan Gautam<sup>1</sup>, Anisha Chalise<sup>3</sup>, Tara Nath Koirala<sup>4</sup>, Sujan Babu Marahatta<sup>1</sup>

<sup>1</sup> Department of Public Health, Manmohan Memorial Institute of Health Sciences, Kathmandu, Nepal

<sup>2</sup> Central Department of Statistics, Tribhuvan University, Kathmandu, Nepal

<sup>3</sup> Center for Research on Environment Health & Population Activities (CREHPA), Kusunti, Lalitpur, Nepal

<sup>4</sup> Pokhara Super Speciality Health Clinic, Consultant Endocrinologist, Pokhara, Nepal

| Authors                                       | Institution Affiliation                                                                             |
|-----------------------------------------------|-----------------------------------------------------------------------------------------------------|
| 1 <sup>st</sup> Author: Shishir Paudel        | Department of Public Health, Manmohan Memorial Institute of Health Sciences, Kathmandu, Nepal       |
| 2 <sup>nd</sup> Author: Shankar Prasad Khanal | Central Department of Statistics, Tribhuvan University, Kathmandu, Nepal                            |
| 3 <sup>rd</sup> Author: Sujan Gautam          | Department of Public Health, Manmohan Memorial Institute of Health Sciences, Kathmandu, Nepal       |
| 4 <sup>th</sup> Author: Anisha Chalise        | Center for Research on Environment Health & Population Activities(CREHPA), Kusunti, Lalitpur, Nepal |
| 5 <sup>th</sup> Author : Tara Nath Koirala    | Pokhara Super Speciality Health Clinic, Consultant Endocrinologist, Pokhara, Nepal                  |
| 6 <sup>th</sup> Author : Sujan Babu Marahatta | Department of Public Health, Manmohan Memorial Institute of Health Sciences, Kathmandu, Nepal       |

## CORRESPONDING AUTHOR:

Name: Sujan Babu Marahatta

Email: [sujan@nou.edu.np](mailto:sujan@nou.edu.np)

Contact no: +977-9851126707

Address: Kathmandu, Nepal

**Words Counts: 3,208** (excluding title page, abstract, references, and tables)

**Number of tables: 7**

## ABSTRACT

**Objectives:** To estimate the prevalence of anxiety and depression and identify their risk factors among people with type 2 diabetes visiting diabetes clinics of Pokhara Metropolitan, Nepal.

**Design:** Cross-sectional study.

**Setting:** Three diabetes clinics in Pokhara Metropolitan, Nepal; From May to July 2021.

**Participants:** 283 people with T2DM visiting selected diabetes centers of Pokhara Metropolitan.

**Main Outcome Measures:** Anxiety and Depression.

**Methods:** Face-to-face interview was conducted using a structured questionnaire consisting information related to participants' socio-demographic profile, and several factors along with Hospital Anxiety and Depression-anxiety subscale (HADS-A) and Patient Health Questionnaire (PHQ-9) to assess the level of anxiety and depression respectively. Pearson's chi-square tests and binary logistic regression were performed to examine association between dependent and independent variables at 5% level of significance.

**Results:** The prevalence of anxiety and depression was noted among 31.4% (95% CI: 26.2%-37.5%) and 36.4% (95% CI: 30.8%-42.0%) of people with T2DM respectively. Anxiety was found to be associated with lower level of perceived social support (AOR:2.442, 95% CI:1.020-5.845), multiple complications (AOR:2.758, 95% CI:1.015-7.334), and comorbidities (AOR:2.110, 95% CI:1.004-4.436), severe COVID-19 fear (AOR:2.343, 95% CI:1.123-4.887), and sleep dissatisfaction (AOR:1.912, 95% CI:1.073-3.047). Likewise, economical dependency (AOR:1.890, 95% CI:1.026-3.482), no insurance (AOR:2.973, 95% CI:1.134-7.093), lower perceived social support (AOR:2.883, 95% CI:1.158-7.181), multiple complications (AOR:2.308, 95% CI:1.585-6.422), and comorbidities (AOR:2.575, 95% CI:1.180-5.617), severe COVID-19 fear (AOR:2.117, 95% CI:1.009-4.573), alcohol use (AOR:2.401, 95% CI:1.199-4.806), and sleep dissatisfaction (AOR:1.995, 95% CI:1.093-3.644) were found to be associated with depression.

**Conclusion:** This study showed a high prevalence of anxiety as well as depression among people with T2DM. Strengthening social support and focusing on people with diabetes suffering from comorbidity and complications could reduce their risk of mental health problems.

**Keywords:** Anxiety, Depression, Type 2 Diabetes, Prevalence, Risk Factors, Psychological distress

## Strengths and Limitations of this Study

- The study used validated screening tools to assess the level of anxiety, depression, and level of perceived social support
- The study was conducted in three most sought health facilities of Pokhara Metropolitan, and the participants were selected based on systematic random sampling technique ensuring the sample represents the people living with type 2 diabetes in this metropolitan.
- The study illustrates a significant relationship existing between mental health status and COVID-19 pandemic in this vulnerable population and at the same time, by adjusting the effect of COVID-19, this study also validates the significance of other independent factors.
- Although the study was performed in the largest Metropolitan City of Nepal, the prevalence of anxiety and depression reported in this study might be slightly higher than the actual prevalence present at the community level, as this was a health institution-based study conducted at the time of COVID-19 pandemic.

## INTRODUCTION

Diabetes mellitus is a systemic disease that may affect various body systems leading to blindness, kidney failure, and lower limb amputation as its long-term complications.<sup>[1-3]</sup> The global prevalence of diabetes was estimated at 9.3% in the year 2019 with a prediction that globally 578 million people will have diabetes by the year 2030.<sup>[4]</sup> Its prevalence has been rising rapidly in low and middle-income countries than that in high-income countries.<sup>[5]</sup> A systematic review from 2021 based on publications from 2000-2020, noted the pooled prevalence of type 2 diabetes (T2DM) in Nepal at 10% with a higher prevalence observed in studies published between the years 2015 and 2020, which was at 11.24%.<sup>[6]</sup>

Mental distress is an emotional state which manifests with a range of depression, anxiety, panic, or somatic symptoms such as sleep problems, headache, and backache.<sup>[7]</sup> Globally, the prevalence of psychological distress mostly depression and anxiety disorders are higher among people living with diabetes as compared to their counterparts.<sup>[8-10]</sup> A systematic review estimated the global prevalence of depression among people with T2DM at 28%, where Asia has the highest rate of depression at 32%.<sup>[11]</sup> Similarly, another systematic review observed generalized anxiety disorder to be present among 14% of people with T2DM.<sup>[12]</sup> In Nepal, a cross-sectional study performed

1  
2  
3 among people with T2DM attending tertiary care centers in Kathmandu valley found the rate of  
4 depression at 40.3% in the year 2013.<sup>[13]</sup> Similarly, a study conducted in a community setting of  
5 Duhabi-Bhaluwa Municipality of Sunsari District in 2019 revealed the prevalence of depression  
6 among people with T2DM to be at 22.7%.<sup>[14]</sup>  
7  
8  
9

10 Diabetes care mainly consists of self-care aimed to prevent acute and chronic complications. The  
11 person living with diabetes is responsible to balance their food intake, physical activities and  
12 monitor blood glucose levels as much as possible.<sup>[15]</sup> Mental health complications, mostly anxiety  
13 and depression complicate living with diabetes and its management in several ways. Presence of  
14 depression and anxiety could worsen the prognosis of diabetes by reducing patients' ability for  
15 self-care and increasing non-compliance to treatments while increasing the risk of serious short-  
16 and long-term complications such as blindness, amputations, stroke, decreased quality of life, and  
17 even premature death.<sup>[15-18]</sup> Additionally, serious anxiety disorders largely overlap with symptoms  
18 of hypoglycemia which requires immediate treatment but people with diabetes might fail to  
19 differentiate whether the feelings are of anxiety or hypoglycemia. The preexisting anxiety of  
20 injections or blood draws might lead to panic disorders or patients' refusal to monitor their glucose  
21 levels.<sup>[20]</sup> Similarly, fear of hypoglycemia, a common source of anxiety and depression for people  
22 with diabetes, can lead them to maintain blood glucose levels above target levels.<sup>[19]</sup> The presence  
23 of diabetes is a chronic life-threatening stressor that requires significant mental and physical  
24 support and care to cope with elevated feelings of fear and distress.<sup>[20]</sup> Even in the current context  
25 of COVID-19 pandemic, people with diabetes are taken as one of the vulnerable populations at  
26 risk of infection and mortality. Thus, the COVID-19 pandemic might have aggregated their  
27 existing fear and distress worsening their mental well-being. Considering this circumstance there  
28 are higher concerns stressed over the mental health and wellbeing of this vulnerable population.<sup>[21,</sup>  
29  
30  
31  
32  
33  
34  
35  
36  
37  
38  
39  
40  
41  
42  
43  
44  
45  
46  
47  
48  
49  
50  
51  
52  
53  
54  
55  
56  
57  
58  
59  
60

There is a lack of plentiful information about the rates of anxiety and depression among people  
with diabetes as well as its associated risk factors in South Asia and particularly in Nepal because  
of the limited studies published to date considering the mental health perspective of the people  
with diabetes. Thus, this study aimed to assess the prevalence and factors associated with anxiety  
and depression among people with type 2 diabetes visiting diabetes clinics of Pokhara  
Metropolitan, one of the rapidly urbanizing cities of Nepal with an expectation that the study could

1  
2  
3 provide some valuable insights into mental health issues of these people in developing nations  
4 similar to Nepal.  
5

## 6 7 **METHODS AND MATERIALS**

### 8 9 **Study Design**

10  
11 This was a health facility-based cross-sectional study executed among people with type 2 diabetes  
12 residing at Pokhara Metropolitan who visited the selected healthcare institutions between May and  
13 July 2021.  
14  
15

### 16 17 **Participants**

18  
19 All people with type 2 diabetes mellitus with at least six months of history of diagnosis, attending  
20 the selected diabetes clinics were eligible to be included, while people with T2DM who were not  
21 the residents of Pokhara Metropolitan for at least past six months from the date of data collection  
22 were excluded.  
23  
24  
25

### 26 27 **Sample Size Determination and Sampling Technique**

28  
29 The sample size was determined using Cochran's formula for the estimation of a proportion  
30 ( $n = z^2 pq/d^2$ ), since our major outcome variables were prevalence of anxiety and depression. A  
31 community-based cross-sectional study conducted in the eastern part of Nepal reported the  
32 prevalence of depression among people with T2DM to be 22.7%. [14] So, using this past prevalence  
33 at 5% allowable error and 95% confidence interval, the initially estimated sample size was 264  
34 people with T2DM which was optimized to 291 after adjusting 10% non-response rate.  
35  
36  
37

38  
39 Two government health institutions (Urban Health Promotion Center and Shishuwa Hospital) and  
40 one private clinic (Pokhara Super Speciality Health Clinic) were selected purposively. Urban  
41 Health Promotion Center and Shishuwa Hospital are the primary contact points for Social Health  
42 Insurance and provide free diabetes-related services as well as referral services. Thus, these are  
43 some of the most sought government institutions with an estimated 250-300 people with T2DM  
44 visiting monthly. Pokhara Super Speciality Health Clinic is one of the well-known tertiary  
45 endocrine referral centers of Pokhara with an average of 500 people with diabetes visiting monthly.  
46 The people with T2DM visiting these three healthcare institutions were selected randomly using  
47 the technique based on systematic random sampling. For this, every  $k^{\text{th}}$  patient ( $800/291 = 2.74 \approx 3$ )  
48 i.e. 3<sup>rd</sup> patient waiting in the queue on the day of data collection was enrolled as a participant. If  
49  
50  
51  
52  
53  
54  
55  
56  
57  
58  
59  
60



1  
2  
3 the selected patient refused to participate or fell under exclusion criteria, then the patient next in  
4 the queue was approached for participation.  
5  
6

### 7 **Data Collection**

8  
9 Face-to-face interview technique was used for data collection. The people with T2DM meeting  
10 inclusion criteria were approached and provided with the study details. Informed consent was  
11 acquired and after his/her approval, the interview was performed. Considering the privacy of the  
12 participants Pokhara Super Speciality Health Clinic provided the researcher with a separate room  
13 next to the doctors' cabin, while a small private space was provided at the corner of the doctors'  
14 cabin and in the waiting area in Urban Health Promotion Center and Shishuwa Hospital where the  
15 patients were directed for data collection.  
16  
17

18  
19 The data was collected using a set of closed-ended questions consisting of three sections. The first  
20 section consisted of questions regarding the socio-demographic profile of the participants  
21 including Multidimensional Scale of Perceived Social Support (MSPSS)<sup>[23]</sup> translated in Nepali  
22 language (MSPSS-N)<sup>[24]</sup> intending to measure the level of perceived social support. Second section  
23 consisted of questions regarding the patient's health conditions, diabetes-related attributes, and  
24 lifestyle-related factors including COVID-19 related variables such as COVID-19 status,  
25 vaccination, and fear associated with COVID-19 based on a modification of Fear scale of COVID-  
26 19<sup>[25]</sup>. Third section consisted of a nine-item Patient Health Questionnaire (PHQ-9)<sup>[26]</sup> to measure  
27 the level of depression followed by Hospital Anxiety and Depression Scale-anxiety subscale  
28 (HADS-A)<sup>[27]</sup> to measure the level of anxiety.  
29  
30

31  
32 The PHQ-9 consists of nine items measuring depressive symptoms corresponding to diagnostic  
33 criteria for major depressive disorder. Each item was scored on a four-point Likert scale (0–3) with  
34 scores ranging from 0 to 27, with higher scores reflecting greater depression severity.<sup>[26]</sup> The PHQ-  
35 9 has been translated in Nepali language and has shown a sensitivity of 0.94 and specificity of 0.80  
36 to measure depression at the cutoff of  $\geq 10$ .<sup>[28]</sup> The HADS-A consist of seven items measuring  
37 anxiety symptoms. Each item is scored on a four-point Likert scale (0-3) with total scores ranging  
38 from 0 to 21 with higher scores reflecting greater anxiety and cutoff point of  $\geq 8$  illustrating  
39 anxiety.<sup>[27]</sup> The HADS has been validated in Nepali language where HADS-A subscale was found  
40 to have a good internal consistency with Cronbach's alpha of 0.76.<sup>[29]</sup> The data collection tool  
41 used in the present study is attached as a supplemental file.  
42  
43  
44  
45  
46  
47  
48  
49  
50  
51  
52  
53  
54  
55  
56  
57  
58  
59  
60



## Data Processing, Management and Analysis

The collected data were entered in EpiData 3.1 and exported to Statistical Package for Social Sciences (SPSS) version 22 for statistical analysis. The data were summarized in terms of frequencies and proportions. Bivariate analysis was carried out by applying Chi-square ( $\chi^2$ ) tests to identify the factors associated with anxiety and depression at 95% Confidence Interval (CI) and 5% level of significance i.e. p-value <0.05. The variables found to be significant in bivariate analysis were considered for multivariate analysis using binary logistic regression to determine the adjusted effect of each factor on the dependent variable. Prior to multivariate regression analysis, the multi-collinearity between the independent variables was tested using the Variance Inflation Factor (VIF) test, with a VIF greater than five taken as an indication of multi-collinearity between the independent variables. The Hosmer-Lemeshow test (HL test) for goodness-of-fit was also performed.

## Ethical Considerations

The ethical approval for this study was obtained from the Institutional Review Committee of Manmohan Memorial Institute of Health Science (Registration no: MMIHS-IRC 583). Written informed consent was obtained from all the participants before conducting the study and all the information was kept confidential.

## Patient and Public Involvement

None.

## RESULTS

A total of 291 people with T2DM were approached for data collection, of which 283 provided complete responses to all the questions, while eight participants left in the middle of the data collection. Thus, the response rate of 97.25% for all questions was acquired and 283 total samples were analyzed for this study. The prevalence of anxiety and depression was noted among 31.4% and 36.4% of people with T2DM respectively (Table 1). Moreover, around one-third (36%) of the participants reported to have experienced suicidal ideation in the past two weeks on PHQ-9 of which six participants (2.1%) reported experiencing suicidal ideation nearly every single day.

Table 1: Prevalence of Anxiety and Depression (n=283)

| Outcome | n (%) | 95% CI | Outcome | n (%) | 95% CI |
|---------|-------|--------|---------|-------|--------|
|---------|-------|--------|---------|-------|--------|

| <b>Anxiety Status</b> |            |             | <b>Depression Status</b> |            |              |
|-----------------------|------------|-------------|--------------------------|------------|--------------|
| Present               | 89 (31.4)  | 26.2%-37.5% | Present                  | 103 (36.4) | 30.8%-42.0%  |
| Absent                | 194 (68.6) | 62.5%-73.8% | Absent                   | 180 (63.6) | 58.0%-69.2%  |
| <b>Anxiety Level</b>  |            |             | <b>Depression Level</b>  |            |              |
| No Anxiety            | 194 (68.6) | 62.5%-73.8% | No Depression            | 180 (63.6) | 57.6 %-68.6% |
| Mild Anxiety          | 62 (21.9)  | 16.6%-27.2% | Mild Depression          | 71 (25.1)  | 20.1%-30.7%  |
| Moderate Anxiety      | 19 (6.7)   | 3.9%-9.9%   | Moderate Depression      | 22 (7.8)   | 4.6%-11.0%   |
| Severe Anxiety        | 8 (2.8)    | 1.1%-5.3%   | Severe Depression        | 10 (3.5)   | 1.8%-5.7%    |

The age of the participants in this study ranged from 33 to 88 years with a mean age of 56.17±11.81 years. Almost half of the participants (56.9%) were male. Majority (91.5%) reported living with their family and near to half (42.8%) reported to be economically dependent. Nearly half of the participants (54.8%) reported to have no insurance coverage for their treatment. Likewise, one in six participants reported to have a lower level of perceived social support. (Table 2)

Table 2: Socio-demographic profile of the participants (n=283)

| <b>Variables</b>               | <b>n (%)</b> |
|--------------------------------|--------------|
| <b>Age group</b>               |              |
| <40 years                      | 30 (10.6)    |
| 40-50                          | 65 (23.0)    |
| 50-60                          | 77 (27.2)    |
| ≥60 years                      | 111 (39.2)   |
| <b>Gender</b>                  |              |
| Male                           | 161 (56.9)   |
| Female                         | 122 (43.1)   |
| <b>Ethnicity</b>               |              |
| Brahmin/Chhetri                | 107 (37.8)   |
| Janajaties                     | 122 (43.1)   |
| Dalit                          | 33 (11.7)    |
| Religious Minorities           | 21 (7.4)     |
| <b>Type of Family</b>          |              |
| Nuclear                        | 143 (50.5)   |
| Joint/ Extended                | 140 (49.4)   |
| <b>Living companion</b>        |              |
| Living alone                   | 24 (8.5)     |
| Living with family             | 259 (91.5)   |
| <b>Marital Status</b>          |              |
| Married                        | 232 (82.0)   |
| Unmarried/Divorced             | 13 (4.6)     |
| Widow/ Widower                 | 38 (13.4)    |
| <b>Education</b>               |              |
| Illiterate                     | 49 (17.3)    |
| Literate by Informal Education | 42 (14.8)    |
| Literate by Formal Education   | 192 (67.8)   |
| <b>Economic Dependency</b>     |              |
| Dependent                      | 121 (42.8)   |
| Independent                    | 162 (57.2)   |

|                                 |            |
|---------------------------------|------------|
| <b>Health insurance</b>         |            |
| Full coverage                   | 42 (14.8)  |
| Partial coverage                | 86 (30.4)  |
| No insurance                    | 155 (54.8) |
| <b>Perceived social support</b> |            |
| Low support                     | 41 (14.5)  |
| Moderate Support                | 130 (45.9) |
| High Support                    | 112 (39.6) |

Out of all 283 participants, almost half (46.3%) reported to have lived with diabetes for more than four years of their life. Almost a quarter (25.1%) of the participants reported to have experienced complications related to diabetes whereas nearly half (55.5%) reported to have other comorbidities existing before they got diagnosed with diabetes. Nearly three out of four (71.0%) participants reported having a fear of COVID-19 infection whereas only 9.9% had complete vaccination status (Table 3).

Table 3: Health and lifestyle related characteristics of the participants (n=283)

| Variables                                    | n (%)      |
|----------------------------------------------|------------|
| <b>Duration of Illness</b>                   |            |
| ≤ 4 Years                                    | 152 (53.7) |
| >4 years                                     | 131 (46.3) |
| <b>Use of Insulin</b>                        |            |
| Yes                                          | 33 (12.0)  |
| No                                           | 250 (88.0) |
| <b>Presence of Complications</b>             |            |
| None                                         | 212 (74.9) |
| Single complications                         | 47 (16.6)  |
| Two or more                                  | 24 (8.5)   |
| <b>Presence of Comorbidities</b>             |            |
| None                                         | 126 (44.5) |
| Single comorbidity                           | 84 (29.7)  |
| Two or more                                  | 73 (25.8)  |
| <b>Difficulty following recommended diet</b> |            |
| Too difficult                                | 63 (22.3)  |
| A bit difficult                              | 100 (35.3) |
| Not difficult at all                         | 120 (42.4) |
| <b>History of Mental illness</b>             |            |
| Yes                                          | 16 (5.7)   |
| No                                           | 267 (94.3) |
| <b>Ever tested for COVID-19</b>              |            |
| Tested Negative                              | 31 (11.0)  |
| Tested Positive                              | 28 (9.9)   |
| Never Tested                                 | 224 (79.1) |
| <b>COVID-19 Vaccine</b>                      |            |
| Complete vaccination                         | 28 (9.9)   |
| Incomplete vaccine                           | 65 (23.0)  |
| Didn't receive vaccine                       | 190 (67.1) |

|                           |            |
|---------------------------|------------|
| <b>COVID-19 Fear</b>      |            |
| Low Fear                  | 105 (37.1) |
| Moderate fear             | 96 (33.9)  |
| Severe Fear               | 82 (29.0)  |
| <b>Alcohol Use</b>        |            |
| Yes                       | 75 (26.5)  |
| No                        | 208 (73.5) |
| <b>Tobacco Use</b>        |            |
| Yes                       | 55 (19.4)  |
| No                        | 228 (80.6) |
| <b>Sleep Satisfaction</b> |            |
| Satisfied                 | 180 (63.6) |
| Not satisfied             | 103 (36.4) |

In bivariate analysis, participants' family type, living companionship and perceived level of social support were the only socio-demographic factors found to be associated with anxiety, whereas, living companionship, economic dependency, insurance coverage diabetes care, and perceived level of social support were the only socio-demographic factors found to be associated with depression at 5% level of significance (Table 4).

Table 4. Association of socio-demographic variables with Anxiety and Depression (n=283)

| Socio-demographic variables    | Anxiety       |              | $\chi^2$ (p-value) | Depression    |              | $\chi^2$ (p-value) |
|--------------------------------|---------------|--------------|--------------------|---------------|--------------|--------------------|
|                                | Presence n(%) | Absence n(%) |                    | Presence n(%) | Absence n(%) |                    |
| <b>Age group</b>               |               |              |                    |               |              |                    |
| <40 years                      | 11 (36.7)     | 19 (63.3)    | 1.006<br>(0.800)   | 13 (43.3)     | 17 (56.7)    | 5.741<br>(0.125)   |
| 40-50                          | 19 (29.2)     | 46 (70.8)    |                    | 16 (24.6)     | 49 (75.4)    |                    |
| 50-60                          | 22 (28.6)     | 55 (71.4)    |                    | 28 (36.4)     | 49 (63.6)    |                    |
| $\geq 60$ years                | 37 (33.3)     | 74 (66.7)    |                    | 46 (41.4)     | 65 (58.6)    |                    |
| <b>Gender</b>                  |               |              |                    |               |              |                    |
| Male                           | 54 (33.5)     | 107 (66.5)   | 0.758<br>(0.384)   | 59 (36.6)     | 102 (63.4)   | 0.010<br>(0.920)   |
| Female                         | 35 (28.7)     | 87 (71.3)    |                    | 44 (36.1)     | 78 (63.9)    |                    |
| <b>Ethnicity</b>               |               |              |                    |               |              |                    |
| Brahmin/Chhetri                | 42 (39.3)     | 65 (60.7)    | 4.953<br>(0.175)   | 38 (35.5)     | 69 (64.5)    | 2.889<br>(0.409)   |
| Janajaties                     | 33 (27.0)     | 89 (73.0)    |                    | 44 (36.1)     | 78 (63.9)    |                    |
| Dalit                          | 9 (27.3)      | 24 (72.7)    |                    | 10 (30.3)     | 23 (69.7)    |                    |
| Religious Minorities           | 5 (23.8)      | 16 (76.2)    |                    | 11 (52.4)     | 10 (47.6)    |                    |
| <b>Type of Family</b>          |               |              |                    |               |              |                    |
| Nuclear                        | 53 (37.1)     | 90 (62.9)    | 4.226<br>(0.040)*  | 59 (41.3)     | 84 (58.7)    | 2.953<br>(0.086)   |
| Joint/ Extended                | 36 (25.7)     | 104 (74.3)   |                    | 44 (31.4)     | 96 (68.6)    |                    |
| <b>Living companion</b>        |               |              |                    |               |              |                    |
| Living alone                   | 13 (55.2)     | 11 (45.8)    | 6.278<br>(0.012)*  | 15 (62.5)     | 9 (37.5)     | 7.719<br>(0.005)*  |
| Living with family             | 76 (29.6)     | 183 (70.7)   |                    | 88 (34.0)     | 171 (66.0)   |                    |
| <b>Marital Status</b>          |               |              |                    |               |              |                    |
| Married                        | 72 (31.0)     | 160 (69.0)   | 1.433<br>(0.489)   | 78 (33.6)     | 154 (66.4)   | 5.464<br>(0.065)   |
| Unmarried/Divorced             | 6 (46.2)      | 7 (53.8)     |                    | 8 (61.5)      | 5 (38.5)     |                    |
| Widow/ Widower                 | 11 (28.9)     | 27 (71.1)    |                    | 17 (44.7)     | 21 (55.3)    |                    |
| <b>Education</b>               |               |              |                    |               |              |                    |
| Illiterate                     | 15 (30.6)     | 34 (69.4)    | 1.880<br>(0.391)   | 21 (42.9)     | 28 (57.1)    | 2.419<br>(0.298)   |
| Literate by Informal Education | 17 (40.5)     | 25 (59.5)    |                    | 18 (43.0)     | 24 (57.0)    |                    |

|                                 |           |            |          |           |            |          |
|---------------------------------|-----------|------------|----------|-----------|------------|----------|
| Literate by Formal Education    | 57 (29.7) | 135 (70.3) |          | 64 (33.3) | 128 (66.7) |          |
| <b>Economic Dependency</b>      |           |            |          |           |            |          |
| Dependent                       | 41 (33.9) | 80 (66.1)  | 0.582    | 55 (45.5) | 66 (54.5)  | 7.493    |
| Independent                     | 48 (29.6) | 114 (70.4) | (0.446)  | 48 (29.6) | 114 (70.4) | (0.006)* |
| <b>Health insurance</b>         |           |            |          |           |            |          |
| Full coverage                   | 9 (21.4)  | 33 (78.6)  | 2.498    | 8 (19.0)  | 34 (81.0)  | 11.287   |
| Partial coverage                | 27 (31.4) | 59 (68.6)  | (0.287)  | 26 (30.2) | 60 (69.8)  | (0.004)* |
| No insurance                    | 53 (34.2) | 102 (65.8) |          | 69 (44.5) | 85 (55.5)  |          |
| <b>Perceived social support</b> |           |            |          |           |            |          |
| Low support                     | 20 (48.8) | 21 (51.2)  | 15.898   | 25 (61.0) | 16 (39.0)  | 18.458   |
| Moderate Support                | 48 (36.9) | 82 (63.1)  | (<0.001) | 51 (39.2) | 79 (60.8)  | (<0.001) |
| High Support                    | 21 (18.8) | 91 (81.3)  | *        | 27 (24.1) | 85 (75.9)  | *        |

\*Statistical significance at  $p < 0.05$

In context of health and lifestyle-related factors, insulin use, presence of complications and comorbidities, prior history of clinically diagnosed mental distress, fear associated with COVID-19, alcohol use and sleep satisfaction were found to be associated with both anxiety and depression status at  $p < 0.05$ . In addition, depression was also found to be associated with the difficulty experienced by people with T2DM to follow dietary recommendations and use of tobacco products. (Table 5). The people with T2DM experiencing anxiety were found to be twice more likely to be depressed (UOR: 2.758, 95% CI:1.641-4.635) in bivariate analysis (Table 5).

Table 5: Association of Health and Lifestyle related variables with Anxiety and Depression (n=283)

| Health and Lifestyle related variables       | Anxiety       |              | $\chi^2$ (p-value) | Depression    |              | $\chi^2$ (p-value) |
|----------------------------------------------|---------------|--------------|--------------------|---------------|--------------|--------------------|
|                                              | Presence n(%) | Absence n(%) |                    | Presence n(%) | Absence n(%) |                    |
| <b>Duration of Illness</b>                   |               |              |                    |               |              |                    |
| ≤ 4 Years                                    | 45 (29.6)     | 107 (70.4)   | 0.518              | 49 (32.2)     | 103 (67.8)   | 2.453              |
| >4 years                                     | 44 (33.6)     | 87 (66.4)    | (0.472)            | 54 (41.2)     | 77 (58.8)    | (0.117)            |
| <b>Use of Insulin</b>                        |               |              |                    |               |              |                    |
| Yes                                          | 17 (51.5)     | 16 (48.5)    | 6.977              | 20 (60.6)     | 13 (39.4)    | 9.459              |
| No                                           | 72 (28.8)     | 178 (71.2)   | (0.008)*           | 83 (33.2)     | 167 (66.8)   | (0.002)*           |
| <b>Presence of Complications</b>             |               |              |                    |               |              |                    |
| None                                         | 53 (25.0)     | 159 (75.0)   | 16.502             | 63 (29.7)     | 149 (70.3)   | 16.345             |
| Single complications                         | 23 (48.9)     | 24 (51.1)    | (<0.001)*          | 26 (55.3)     | 21 (44.7)    | (<0.001)*          |
| Two or more                                  | 13 (54.2)     | 11 (45.8)    |                    | 14 (58.3)     | 10 (41.7)    |                    |
| <b>Presence of Comorbidities</b>             |               |              |                    |               |              |                    |
| None                                         | 24 (19.0)     | 102 (81.0)   | 17.118             | 28 (22.2)     | 98 (77.8)    | 22.617             |
| Single comorbidity                           | 32 (38.1)     | 52 (61.9)    | (<0.001)*          | 35 (41.7)     | 49 (58.3)    | (<0.001)*          |
| Two or more                                  | 33 (45.2)     | 40 (54.8)    |                    | 40 (54.8)     | 33 (45.2)    |                    |
| <b>Difficulty following recommended diet</b> |               |              |                    |               |              |                    |
| Too difficult                                | 24 (38.1)     | 39 (61.9)    | 1.686              | 34 (54.0)     | 29 (46.0)    | 13.326             |
| A bit difficult                              | 29 (30.6)     | 71 (69.4)    | (0.430)            | 37 (34.0)     | 63 (66.0)    | (<0.001)*          |
| Not difficult at all                         | 36 (30.0)     | 84 (70.0)    |                    | 32 (26.7)     | 88 (73.3)    |                    |
| <b>History of Mental illness</b>             |               |              |                    |               |              |                    |
| Yes                                          | 9 (56.3)      | 7 (43.8)     | 4.839              | 10 (62.5)     | 6 (37.5)     | 4.992              |
| No                                           | 80 (30.0)     | 187 (70.0)   | (0.028)*           | 93 (34.8)     | 174 (65.2)   | (0.025)*           |

|                                 |           |            |                         |           |            |                         |
|---------------------------------|-----------|------------|-------------------------|-----------|------------|-------------------------|
| <b>Ever tested for COVID-19</b> |           |            |                         |           |            |                         |
| Tested Negative                 | 14 (45.2) | 17 (54.8)  | 3.368<br>(0.186)        | 9 (29.0)  | 22 (71.0)  | 0.850<br>(0.654)        |
| Tested Positive                 | 7 (25.0)  | 21 (75.0)  |                         | 10 (35.7) | 18 (64.3)  |                         |
| Never Tested                    | 68 (30.4) | 156 (69.6) |                         | 84 (37.5) | 140 (62.5) |                         |
| <b>COVID-19 Vaccine</b>         |           |            |                         |           |            |                         |
| Complete vaccination            | 11 (39.3) | 17 (60.7)  | 1.005<br>(0.605)        | 9 (32.1)  | 19 (67.9)  | 2.508<br>(0.285)        |
| Incomplete vaccine              | 21 (32.3) | 44 (67.7)  |                         | 29 (44.6) | 36 (55.4)  |                         |
| Didn't receive vaccine          | 57 (30.0) | 133 (70.0) |                         | 65 (34.2) | 125 (65.8) |                         |
| <b>COVID-19 Fear</b>            |           |            |                         |           |            |                         |
| Low Fear                        | 22 (21.0) | 83 (79.0)  | 10.325<br>(0.006)*      | 27 (25.7) | 78 (74.3)  | 8.614<br>(0.013)*       |
| Moderate fear                   | 32 (33.3) | 64 (66.7)  |                         | 39 (40.6) | 57 (59.4)  |                         |
| Severe Fear                     | 35 (42.7) | 47 (57.3)  |                         | 37 (45.1) | 45 (54.9)  |                         |
| <b>Alcohol Use</b>              |           |            |                         |           |            |                         |
| Yes                             | 31 (41.3) | 44 (58.7)  | 4.625<br>(0.033)*       | 39 (52.0) | 36 (48.0)  | 10.733<br>(0.001)*      |
| No                              | 58 (27.9) | 150 (72.1) |                         | 64 (30.8) | 144 (69.2) |                         |
| <b>Tobacco Use</b>              |           |            |                         |           |            |                         |
| Yes                             | 23 (41.8) | 32 (58.2)  | 3.405<br>(0.065)        | 27 (49.1) | 28 (50.9)  | 4.753<br>(0.029)*       |
| No                              | 66 (28.9) | 162 (71.1) |                         | 76 (33.3) | 152 (66.7) |                         |
| <b>Sleep Satisfaction</b>       |           |            |                         |           |            |                         |
| Satisfied                       | 45 (25.0) | 135 (75.0) | 9.540<br>(0.002)*       | 52 (28.9) | 128 (71.1) | 12.039<br>(0.001)*      |
| Not satisfied                   | 44 (42.7) | 59 (57.3)  |                         | 51 (49.5) | 52 (50.5)  |                         |
| <b>Depression</b>               |           |            |                         |           |            |                         |
| Present                         | 47 (45.6) | 56 (54.4)  | 15.109<br>( $<0.001$ )* | -         | -          | -                       |
| Absent                          | 42 (23.2) | 138 (76.7) |                         | -         | -          |                         |
| <b>Anxiety</b>                  |           |            |                         |           |            |                         |
| Present                         | -         | -          | -                       | 47 (52.8) | 42 (47.2)  | 15.109<br>( $<0.001$ )* |
| Absent                          | -         | -          |                         | 56 (28.9) | 138 (71.1) |                         |

\*Statistical significance at  $p < 0.05$

For multivariate analysis, the Variance Inflation Factor (VIF) test among the independent variables was performed where the highest reported VIF was 1.610 so there was no issue of multicollinearity. Lower level of perceived social support (AOR:2.442, 95% CI:1.020-5.845), presence of single (AOR:2.081, 95% CI:1.002-4.414) and multiple complications (AOR:2.758, 95% CI:1.015-7.334), presence of single comorbidity (AOR:2.127, 95% CI:1.059-4.272) and multiple comorbidities (AOR:2.110, 95% CI:1.004-4.436), severe fear of COVID-19 infection (AOR:2.343, 95% CI:1.123-4.887), and sleep dissatisfaction (AOR:1.912, 95% CI:1.073-3.047) were found to associated with anxiety (Table 6).

Table 6: Factors associated with anxiety among people with diabetes (n=283)

| Factors                                  | UOR   | 95% CI      | p-value | AOR <sup>a</sup> | 95% CI      | p-value |
|------------------------------------------|-------|-------------|---------|------------------|-------------|---------|
| <b>Type of Family</b>                    |       |             |         |                  |             |         |
| Nuclear                                  | 1.701 | 1.023-2.829 | 0.041*  | 1.458            | 0.784-2.711 | 0.233   |
| Joint/ Extended                          | Ref   |             |         | Ref              |             |         |
| <b>Living companion</b>                  |       |             |         |                  |             |         |
| Living alone                             | 2.846 | 1.221-6.633 | 0.015*  | 1.108            | 0.405-3.034 | 0.842   |
| Living with family                       | Ref   |             |         | Ref              |             |         |
| <b>Perceived level of social support</b> |       |             |         |                  |             |         |

|                                  |       |             |         |       |             |        |
|----------------------------------|-------|-------------|---------|-------|-------------|--------|
| Low support                      | 4.127 | 1.902-8.955 | <0.001* | 2.442 | 1.020-5.845 | 0.045* |
| Moderate Support                 | 2.537 | 1.401-4.591 | 0.002*  | 1.839 | 0.986-3.520 | 0.060  |
| High Support                     | Ref   |             |         | Ref   |             |        |
| <b>Use of Insulin</b>            |       |             |         |       |             |        |
| Yes                              | 2.627 | 1.259-5.481 | 0.010*  | 1.299 | 0.565-3.166 | 0.565  |
| No                               | Ref   |             |         | Ref   |             |        |
| <b>Presence of Complications</b> |       |             |         |       |             |        |
| None                             | Ref   |             |         | Ref   |             |        |
| Single complications             | 2.875 | 1.499-5.512 | 0.001*  | 2.081 | 1.002-4.414 | 0.049* |
| Two or more                      | 3.545 | 1.501-8.387 | 0.004*  | 2.758 | 1.015-7.334 | 0.044* |
| <b>Presence of Comorbidities</b> |       |             |         |       |             |        |
| None                             | Ref   |             |         | Ref   |             |        |
| Single comorbidity               | 2.615 | 1.399-4.890 | 0.003*  | 2.127 | 1.059-4.272 | 0.034* |
| Two or more                      | 3.506 | 1.848-6.652 | <0.001* | 2.110 | 1.004-4.436 | 0.048* |
| <b>History of Mental illness</b> |       |             |         |       |             |        |
| Yes                              | 3.005 | 1.082-8.350 | 0.035*  | 2.132 | 0.680-6.687 | 0.194  |
| No                               | Ref   |             |         | Ref   |             |        |
| <b>COVID-19 Fear</b>             |       |             |         |       |             |        |
| Low Fear                         | Ref   |             |         | Ref   |             |        |
| Moderate fear                    | 1.886 | 1.001-3.553 | 0.049*  | 1.491 | 0.731-3.039 | 0.272  |
| Severe Fear                      | 2.809 | 1.478-5.340 | 0.002*  | 2.343 | 1.123-4.887 | 0.023* |
| <b>Alcohol Use</b>               |       |             |         |       |             |        |
| Yes                              | 1.822 | 1.051-3.160 | 0.033*  | 1.639 | 0.881-3.047 | 0.119  |
| No                               | Ref   |             |         | Ref   |             |        |
| <b>Sleep Satisfaction</b>        |       |             |         |       |             |        |
| Satisfied                        | Ref   |             |         | Ref   |             |        |
| Not satisfied                    | 2.237 | 1.335-3.748 | 0.002*  | 1.912 | 1.073-3.047 | 0.028* |
| <b>Depression</b>                |       |             |         |       |             |        |
| Present                          | 2.758 | 1.641-4.635 | <0.001* |       |             |        |
| Absent                           | Ref   |             |         | -     | -           | -      |

\*Statistical significance at  $p < 0.05$ ; <sup>a</sup> Logistic regression model adjusted for all variables in the table except Depression, Nagelkerker R Square 0.310; Hosmer Lemeshow Chi-square 9.793,  $p = 0.280$ ; CI: confidence interval, UOR: Unadjusted odds ratio, AOR: Adjusted odds ratio

In context of Depression, economical dependency (AOR:1.890, 95% CI:1.026-3.482), lower level of perceived social support (AOR:2.883, 95% CI:1.158-7.181), no insurance coverage (AOR:2.973, 95% CI:1.134-7.093), presence of multiple complications (AOR:2.308, 95% CI:1.585-6.422), presence of single comorbidity (AOR:2.262, 95% CI:1.108-4.619), and multiple comorbidities (AOR:2.575, 95% CI:1.180-5.617), difficulty following the recommended diet (AOR:2.387, 95% CI:1.100-5.182), severe fear of COVID-19 (AOR:2.117, 95% CI:1.009-4.573), alcohol use (AOR:2.401, 95% CI:1.199-4.806), and sleep dissatisfaction (AOR:1.995, 95% CI:1.093-3.644) were found to be associated with depression (Table 7).

Table 7: Factors associated with depression among people with diabetes (n=283)

| Factors                 | UOR | 95% CI | p-value | AOR <sup>a</sup> | 95% CI | p-value |
|-------------------------|-----|--------|---------|------------------|--------|---------|
| <b>Living companion</b> |     |        |         |                  |        |         |



|                                              |       |              |         |       |             |        |
|----------------------------------------------|-------|--------------|---------|-------|-------------|--------|
| Living alone                                 | 3.239 | 1.363-7.695  | 0.008*  | 1.586 | 0.553-4.548 | 0.391  |
| Living with family                           | Ref   |              |         | Ref   |             |        |
| <b>Economic Dependency</b>                   |       |              |         |       |             |        |
| Dependent                                    | 1.979 | 1.210-3.236  | 0.007*  | 1.890 | 1.026-3.482 | 0.041* |
| Independent                                  | Ref   |              |         | Ref   |             |        |
| <b>Perceived level of social support</b>     |       |              |         |       |             |        |
| Low support                                  | 4.919 | 2.295-10.543 | <0.001* | 2.883 | 1.158-7.181 | 0.023* |
| Moderate Support                             | 2.032 | 1.163-3.551  | 0.013*  | 1.345 | 0.696-2.599 | 0.379  |
| High Support                                 | Ref   |              |         | Ref   |             |        |
| <b>Use of Insulin</b>                        |       |              |         |       |             |        |
| Yes                                          | 3.095 | 1.468-6.528  | 0.003*  | 1.265 | 0.905-3.171 | 0.061  |
| No                                           | Ref   |              |         | Ref   |             |        |
| <b>Presence of Complications</b>             |       |              |         |       |             |        |
| None                                         | Ref   |              |         | Ref   |             |        |
| Single complications                         | 2.928 | 1.535-5.587  | 0.010*  | 1.628 | 0.739-3.587 | 0.227  |
| Two or more                                  | 3.311 | 1.397-7.851  | 0.007*  | 2.308 | 1.858-6.422 | 0.046* |
| <b>Presence of Comorbidities</b>             |       |              |         |       |             |        |
| None                                         | Ref   |              |         | Ref   |             |        |
| Single comorbidity                           | 2.500 | 1.367-4.573  | 0.003*  | 2.262 | 1.108-4.619 | 0.025* |
| Two or more                                  | 4.242 | 2.274-7.915  | <0.001* | 2.575 | 1.180-5.617 | 0.017* |
| <b>Health insurance coverage</b>             |       |              |         |       |             |        |
| Full coverage                                | Ref   |              |         | Ref   |             |        |
| Partial coverage                             | 1.842 | 0.751-4.517  | 0.182   | 1.792 | 0.613-4.691 | 0.287  |
| No insurance                                 | 3.410 | 1.483-7.842  | 0.004*  | 2.973 | 1.134-7.093 | 0.027* |
| <b>Difficulty following recommended diet</b> |       |              |         |       |             |        |
| Too difficult                                | 3.224 | 1.701-6.112  | <0.001* | 2.387 | 1.100-5.182 | 0.028* |
| A bit difficult                              | 1.615 | 1.005-2.865  | 0.046*  | 1.112 | 0.555-2.230 | 0.764  |
| Not difficult at all                         | Ref   |              |         | Ref   |             |        |
| <b>History of Mental illness</b>             |       |              |         |       |             |        |
| Yes                                          | 3.118 | 1.099-8.848  | 0.033*  | 2.587 | 0.835-9.025 | 0.139  |
| No                                           | Ref   |              |         | Ref   |             |        |
| <b>COVID-19 Fear</b>                         |       |              |         |       |             |        |
| Low Fear                                     | Ref   |              |         | Ref   |             |        |
| Moderate fear                                | 1.977 | 1.087-3.594  | 0.025*  | 1.496 | 0.731-3.060 | 0.270  |
| Severe Fear                                  | 2.375 | 1.282-4.402  | 0.006*  | 2.117 | 1.009-4.573 | 0.042* |
| <b>Alcohol Use</b>                           |       |              |         |       |             |        |
| Yes                                          | 2.437 | 1.420-4.184  | 0.001*  | 2.401 | 1.199-4.806 | 0.013* |
| No                                           | Ref   |              |         | Ref   |             |        |
| <b>Tobacco Use</b>                           |       |              |         |       |             |        |
| Yes                                          | 1.929 | 1.063-3.500  | 0.031*  | 1.001 | 0.461-2.174 | 0.998  |
| No                                           | Ref   |              |         | Ref   |             |        |
| <b>Sleep Satisfaction</b>                    |       |              |         |       |             |        |
| Satisfied                                    | Ref   |              |         | Ref   |             |        |
| Not satisfied                                | 2.414 | 1.460-3.993  | 0.001*  | 1.995 | 1.093-3.644 | 0.025* |

\*Statistical significance at  $p < 0.05$ ; <sup>a</sup>Logistic regression model adjusted for all variables in the table except Anxiety; Nagelkerker R Square 0.358; Hosmer Lemeshow Chi-square 10.073,  $p = 0.260$ ; CI: confidence interval, UOR: Unadjusted odds ratio, AOR: Adjusted odds ratio



## DISCUSSION

In this study, the prevalence of anxiety and depression among people with T2DM were 31.4% and 36.4% respectively. This rate of prevalence is slightly lower than a recent study conducted among people with T2DM admitted in the tertiary hospital of Chitwan district in 2019 where anxiety and depression were reported among 57.8% and 49.7% of the participants.<sup>[30]</sup> This variation in anxiety and depression might be due to the fact that the past study was conducted in hospital-admitted patients. The current prevalence of depression is in line with past prevalence observed among people visiting diabetes centers in Lalitpur Metropolitan in 2019 where 35.6% of the people with diabetes were found to have depression.<sup>[31]</sup> However, a past community-based study from the Dubabi-Bhaluwa Municipality reported a lower prevalence (22.7%) of depression in the year 2016.<sup>[14]</sup> These variations in the prevalence might be due to the difference in geographic location, study settings, and time factors. In the global context, a similar rate of anxiety and depression has been noted among these vulnerable population in countries of different economies such as China<sup>[32]</sup>, Saudi Arabia<sup>[33, 34]</sup>, Mexico<sup>[35]</sup>, Malaysia<sup>[36]</sup>, Pakistan<sup>[37]</sup>, and India<sup>[38]</sup>.

There was a statistically significant relationship existing between the perceived level of social support and the anxiety and depression status of the people, as the people with a lower level of perceived social support had twice the odds of anxiety and depression. Similar findings were shared by studies from Saudi Arabia and Ethiopia where higher odds of anxiety and depression were seen among people with lower social support.<sup>[34, 39]</sup> As good social support has been observed as a protective factor against anxiety and depression, studies suggest that strengthening social support in these people can improve their psychological well-being.<sup>[40, 41]</sup> Social support plays an important role in the management of diabetes. Having poor social support may lead to delay in healthcare-seeking behavior as well as increased emotional distress.<sup>[34, 39, 42]</sup> This might further inflect an undesirable effect on both physical and mental well-being of the people. Thus, social support in people with diabetes could be strengthened to reduce the risk of mental distress which could be done through frequent engagement of family members at diabetes care settings and formation of peer support groups at the diabetes centers as well as at community levels.

In this study, the presence of comorbidities as well as complications related to diabetes were found to be important factors associated with anxiety and depression among people with T2DM. This is in line with a past study from Nepal where people with diabetes having comorbid conditions had

1  
2  
3 twice the odds of depression.<sup>[43]</sup> Likewise, a study from Ethiopia observed that people worried  
4 about diabetes complications had 6.49 folds increase in odds of depression.<sup>[44]</sup> Similarly, people  
5 with a history of diabetes-related complications were found to have higher odds of anxiety in  
6 Mexico.<sup>[35]</sup> Studies from different parts of the world suggest that the greater the number of  
7 additional illnesses present among people with T2DM, the greater the risk of anxiety and  
8 depression.<sup>[14, 45, 46]</sup> Presence of comorbidity and/or complication creates an additional financial  
9 burden due to increased treatment costs, physical burden, and chronic pain as well as social burden  
10 among the people with T2DM. <sup>[14, 46, 47]</sup> Thus, these might be the contributing factors to impact  
11 their psychological well-being as we also found that economic dependency and absence of health  
12 insurance securities were other risk factors for depression among this vulnerable group. Special  
13 care should be provided to people with diabetes suffering from complications and co-morbid  
14 conditions and should be provided with certain financial protection, proper health counseling, and  
15 routine mental health screening services.

16  
17 In bivariate analysis, we observed that insulin users have twice the odds of experiencing anxiety  
18 and thrice the odds of depression as compared to patients who don't have to use insulin. Similar  
19 observations were shared by past studies from Nepal where one study noted insulin users had twice  
20 the odds of depression as compared to oral medicine users and another study found a nine-fold  
21 increase in depression as compared to non-insulin users.<sup>[14, 48]</sup> Insulin therapy not only involves  
22 painful injections and regular glucose measurement but also is perceived to be used in severe cases.  
23 This perception might influence psychological distress among insulin users.<sup>[8, 14, 49, 50]</sup> However, in  
24 multivariate analyses this statistical relationship between insulin use and both anxiety and  
25 depression was ruled out in our study. This might be because a small proportion of insulin users  
26 were enumerated by chance in our random sample.

27  
28 We observed that the participants who were not satisfied with the duration and quality of their  
29 sleep had almost twice the odds of being anxious and depressed than those who were satisfied with  
30 their sleep. Similar to this finding, a study from China observed that people with diabetes with  
31 poor sleep quality had almost twice the odds of anxiety and depression.<sup>[32]</sup> Short sleep duration  
32 could influence psychological distress even in the general population. People with diabetes suffer  
33 from frequent urination which might affect their quality of sleep and sleep satisfaction, leading to  
34 discomfort, agitation, and stress in long run.<sup>[46]</sup>

1  
2  
3 The severe fear of COVID-19 infection was found to be associated with both anxiety and  
4 depression. A study from Germany noted that people with diabetes tend to perceive a higher  
5 susceptibility to COVID-19 infection, think more about its severe course, and even die from  
6 COVID-19 than other general population. However, the same study revealed that there was no  
7 increase in anxiety and depressive symptoms among individuals with diabetes.<sup>[51]</sup> Moreover,  
8 another study from Germany noted that the rate of anxiety and depression increased at the time of  
9 COVID-19 outbreak.<sup>[52]</sup> As COVID-19 is an emerging public health concern with limited  
10 understanding about its psychological impact on patients with chronic illness who are deemed as  
11 a vulnerable group, there is a need for further studies for a better understanding of its association  
12 with psychological well-being among these vulnerable populations. The fear of COVID-19  
13 pandemic has been found to have significant relationships with anxiety and depression, but by  
14 adjusting its effect we also observed that the presence of the COVID-19 pandemic does not  
15 invalidate the relationship of anxiety and depression with other factors.  
16  
17  
18  
19  
20  
21  
22  
23  
24  
25

### 26 **Limitations**

27  
28  
29 Despite being one of the few studies to assess the status and risk factors for Anxiety and Depression  
30 among people with type 2 diabetes mellitus in Nepal, this study is not free from its limitations. As  
31 the study was executed during the time of COVID-19 pandemic, the observed rate of anxiety and  
32 depression might be slightly overestimated due to the effect of the pandemic, requiring further  
33 studies. A larger sample size would have benefited the precision of our confidence interval but due  
34 to the time constraints and lockdown imposed due to COVID-19 pandemic, the research team  
35 failed to cover a larger sample and only covered the estimated sample size. The patients were  
36 sampled from selected health institutions which might have introduced some selection bias.  
37 Anxiety and depression in this study were assessed through the PHQ-9 and HADS-Anxiety  
38 Subscale, which are screening tools. Thus, cross-verification of anxiety and depression from  
39 psychiatrists might be a limitation of this study. As this study was a health institution-based study,  
40 the prevalence of anxiety and depression might be slightly higher than the actual prevalence  
41 present at the community level.  
42  
43  
44  
45  
46  
47  
48  
49  
50

### 51 **CONCLUSION**

52  
53  
54 The study revealed nearly one-third of the people with type 2 diabetes experienced anxiety of  
55 varying severity, whereas, nearly two-fifths experienced depressive symptoms. Among the various  
56  
57  
58  
59  
60

1  
2  
3 factors, the level of perceived social support, presence of comorbidity and complications, severe  
4 fear of COVID-19 infection, and sleep dissatisfaction were the associated risk factors for both  
5 anxiety and depression. There is a need to integrate mental health counseling services with present  
6 diabetes-related care and support systems to ease patients' physiological well-being. Further  
7 studies based on qualitative perspective could provide valuable insights into the way social  
8 supports and other associated factors are influencing the mental well-being of this vulnerable  
9 population.

## 15 **ACKNOWLEDGEMENT**

16  
17  
18 We thank all the participants for their valuable time and information. We are grateful to Pokhara  
19 Super Speciality Health Clinic, Urban Health Promotion Center, and Shishuwa Hospital for their  
20 approval and support in data collection. We express our gratitude to Dr. Jasmina Gurung, Dr.  
21 Anjali Bhandari, and Mrs. Nirmla Paudel for providing a supportive environment at the time of  
22 data collection.

## 26 **AUTHOR CONTRIBUTIONS**

27  
28  
29 SP: as the primary investigator, lead the conceptualization of the study, questionnaire  
30 development, collected the data, performed preliminary analysis and developed and finalized the  
31 manuscript. SBM, SPK and SG: contributed to the manuscript's conceptualization, analysis and  
32 interpretation of the findings and supervised the study. AC: contributed in data collection and  
33 analysis, editing and revision of the whole manuscript. TNK: contributed in data collection and  
34 review of the manuscript. All authors read and approved the final manuscript.

## 39 **ETHICAL APPROVAL**

40  
41  
42 The ethical approval for this study was obtained from Institutional Review Committee of  
43 Manmohan Memorial Institute of Health Science (Registration no: MMIHS-IRC 583).

## 46 **FUNDING SOURCE**

47  
48 None declared.

## 50 **COMPETING INTERESTS**

51  
52 None declared.

## 55 **DATA SHARING**

The dataset generated and analyzed during the current study are available from the corresponding author upon reasonable request.

## REFERENCES

1. American Diabetes Association. Diagnosis and classification of diabetes mellitus. *Diabetes care*. 2009;32 Suppl 1(Suppl 1):S62-S7.
2. Saedi E, Gheini MR, Faiz F, Arami MA. Diabetes mellitus and cognitive impairments. *World J Diabetes*. 2016;7(17):412-22.
3. WHO. Diabetes. Key facts. 2018. Available from: [www.who.int/news-room/fact-sheets/detail/diabetes](http://www.who.int/news-room/fact-sheets/detail/diabetes).
4. IDF. International Diabetes Federation. Diabetes Atlas reports 463 million with diabetes 2019. Available from: <https://idf.org/news/169:diabetes-atlas-reports-463-million-with-diabetes.html>.
5. WHO. The top 10 causes of death 2020. Available from: <https://www.who.int/news-room/fact-sheets/detail/the-top-10-causes-of-death>.
6. Shrestha DB, Budhathoki P, Sedhai YR, Marahatta A, Lamichhane S, Nepal S, et al. Type 2 Diabetes Mellitus in Nepal from 2000 to 2020: A systematic review and meta-analysis [version 1; peer review: 3 approved with reservations]. *F1000Research*. 2021;10:543.
7. de Waal MWM, Arnold IA, Spinhoven P, Eekhof JAH, van Hemert AM. The reporting of specific physical symptoms for mental distress in general practice. *Journal of psychosomatic research*. 2005;59(2):89-95.
8. Anderson RJ, Freedland KE, Clouse RE, Lustman PJ. The prevalence of comorbid depression in adults with diabetes: a meta-analysis. *Diabetes care*. 2001;24(6):1069-78.
9. Rotella F, Mannucci E. Diabetes mellitus as a risk factor for depression. A meta-analysis of longitudinal studies. *Diabetes research and clinical practice*. 2013;99(2):98-104.
10. Lin EH, Von Korff M, Alonso J, Angermeyer MC, Anthony J, Bromet E, et al. Mental disorders among persons with diabetes--results from the World Mental Health Surveys. *Journal of psychosomatic research*. 2008;65(6):571-80.
11. Khaledi M, Haghghatdoost F, Feizi A, Aminorroaya A. The prevalence of comorbid depression in patients with type 2 diabetes: an updated systematic review and meta-analysis on huge number of observational studies. *Acta diabetologica*. 2019;56(6):631-50.
12. Grigsby AB, Anderson RJ, Freedland KE, Clouse RE, Lustman PJ. Prevalence of anxiety in adults with diabetes: a systematic review. *Journal of psychosomatic research*. 2002;53(6):1053-60.
13. Niraula K, Kohrt BA, Flora MS, Thapa N, Mumu SJ, Pathak R, et al. Prevalence of depression and associated risk factors among persons with type-2 diabetes mellitus without a prior psychiatric history: a cross-sectional study in clinical settings in urban Nepal. *BMC psychiatry*. 2013;13(1):309.
14. Sunny AK, Khanal VK, Sah RB, Ghimire A. Depression among people living with type 2 diabetes in an urbanizing community of Nepal. *PloS one*. 2019;14(6):e0218119.
15. Schram MT, Baan CA, Pouwer F. Depression and quality of life in patients with diabetes: a systematic review from the European depression in diabetes (EDID) research consortium. *Curr Diabetes Rev*. 2009;5(2):112-9.
16. Ducat L, Rubenstein A, Philipson LH, Anderson BJ. A Review of the Mental Health Issues of Diabetes Conference. *Diabetes care*. 2015;38(2):333-8.

17. Egede LE, Nietert PJ, Zheng D. Depression and all-cause and coronary heart disease mortality among adults with and without diabetes. *Diabetes care*. 2005;28(6):1339-45.
18. Gonzalez JS, Peyrot M, McCarl LA, Collins EM, Serpa L, Mimiaga MJ, et al. Depression and diabetes treatment nonadherence: a meta-analysis. *Diabetes care*. 2008;31(12):2398-403.
19. Ducat L, Philipson LH, Anderson BJ. The mental health comorbidities of diabetes. *JAMA*. 2014;312(7):691-2.
20. Kaur G, Tee GH, Ariaratnam S, Krishnapillai AS, China K. Depression, anxiety and stress symptoms among diabetics in Malaysia: a cross sectional study in an urban primary care setting. *BMC family practice*. 2013;14(1):1-13.
21. Alessi J, de Oliveira GB, Franco DW, Brino do Amaral B, Becker AS, Knijnik CP, et al. Mental health in the era of COVID-19: prevalence of psychiatric disorders in a cohort of patients with type 1 and type 2 diabetes during the social distancing. *Diabetology & metabolic syndrome*. 2020;12(1):76.
22. Anisha C, Shishir P. Mental Health Concern during COVID-19 Pandemic in Nepal. *Europasian Journal of Medical Sciences*. 2020;2(0).
23. Zimet GD, Dahlem NW, Zimet SG, Farley GK. The Multidimensional Scale of Perceived Social Support. *Journal of Personality Assessment*. 1988;52(1):30-41.
24. Tonsing K, Zimet GD, Tse S. Assessing social support among South Asians: The multidimensional scale of perceived social support. *Asian journal of psychiatry*. 2012;5(2):164-8.
25. Ahorsu DK, Lin C-Y, Imani V, Saffari M, Griffiths MD, Pakpour AH. The Fear of COVID-19 Scale: Development and Initial Validation. *Int J Ment Health Addict*. 2020:1-9.
26. Kroenke K, Spitzer RL, Williams JB. The PHQ-9: validity of a brief depression severity measure. *Journal of general internal medicine*. 2001;16(9):606-13.
27. Zigmond AS, Snaith RP. The hospital anxiety and depression scale. *Acta psychiatrica Scandinavica*. 1983;67(6):361-70.
28. Kohrt BA, Luitel NP, Acharya P, Jordans MJ. Detection of depression in low resource settings: validation of the Patient Health Questionnaire (PHQ-9) and cultural concepts of distress in Nepal. *BMC psychiatry*. 2016;16:58.
29. Risal A, Manandhar K, Linde M, Koju R, Steiner TJ, Holen A. Reliability and Validity of a Nepali-language Version of the Hospital Anxiety and Depression Scale (HADS). *Kathmandu University medical journal (KUMJ)*. 2015;13(50):115-24.
30. Sharma K, Dhungana G, Adhikari S, Bista Pandey A, Sharma M. Depression and Anxiety among Patients with Type II Diabetes Mellitus in Chitwan Medical College Teaching Hospital, Nepal. *Nursing research and practice*. 2021;2021:8846915.
31. Thapa S, Lamichhane N, Mishra DK. Depression among People Living with Type II Diabetes in Kathmandu Valley of Nepal: A CrossSectional Study. *Int J Health Sci Res*. 2019;9(11):10-7.
32. Sun N, Lou P, Shang Y, Zhang P, Wang J, Chang G, et al. Prevalence and determinants of depressive and anxiety symptoms in adults with type 2 diabetes in China: a cross-sectional study. *BMJ open*. 2016;6(8):e012540.
33. AlBekairy A, AbuRuz S, Alsabani B, Alshehri A, Aldebasi T, Alkatheri A, et al. Exploring Factors Associated with Depression and Anxiety among Hospitalized Patients with Type



- 2 Diabetes Mellitus. Medical principles and practice : international journal of the Kuwait University, Health Science Centre. 2017;26(6):547-53.
34. Al-Mohaimed AA. Prevalence and factors associated with anxiety and depression among type 2 diabetes in Qassim: A descriptive cross-sectional study. *Journal of Taibah University Medical Sciences*. 2017;12(5):430-6.
35. Tovilla-Zarate C, Juarez-Rojop I, Peralta Jimenez Y, Jimenez MA, Vazquez S, Bermudez-Ocana D, et al. Prevalence of anxiety and depression among outpatients with type 2 diabetes in the Mexican population. *PloS one*. 2012;7(5):e36887.
36. Ganasegeran K, Renganathan P, Manaf RA, Al-Dubai SAR. Factors associated with anxiety and depression among type 2 diabetes outpatients in Malaysia: a descriptive cross-sectional single-centre study. *BMJ open*. 2014;4(4):e004794.
37. Khuwaja AK, Lalani S, Dhanani R, Azam IS, Rafique G, White F. Anxiety and depression among outpatients with type 2 diabetes: A multi-centre study of prevalence and associated factors. *Diabetology & metabolic syndrome*. 2010;2(1):72.
38. Rajput R, Gehlawat P, Gehlan D, Gupta R, Rajput M. Prevalence and predictors of depression and anxiety in patients of diabetes mellitus in a tertiary care center. *Indian J Endocrinol Metab*. 2016;20(6):746-51.
39. Engidaw NA, Wubetu AD, Basha EA. Prevalence of depression and its associated factors among patients with diabetes mellitus at Tirunesh-Beijing general hospital, Addis Ababa, Ethiopia. *BMC public health*. 2020;20(1):266.
40. Wu SF, Young LS, Yeh FC, Jian YM, Cheng KC, Lee MC. Correlations among social support, depression, and anxiety in patients with type-2 diabetes. *The journal of nursing research : JNR*. 2013;21(2):129-38.
41. Zhang W, Xu H, Zhao S, Yin S, Wang X, Guo J, et al. Prevalence and influencing factors of co-morbid depression in patients with type 2 diabetes mellitus: a General Hospital based study. *Diabetology & metabolic syndrome*. 2015;7:60.
42. Ramkisson S, Pillay BJ, Sibanda W. Social support and coping in adults with type 2 diabetes. *African journal of primary health care & family medicine*. 2017;9(1):e1-e8.
43. Pahari DP, Upadhyay R, Sharma CK. Depression among diabetic patients visiting a diabetes center in Nepal. *Health Prospect: Journal of Public Health*. 2018;17:21-5.
44. Abate TW, Gedamu H. Psychosocial and clinical factors associated with depression among individuals with diabetes in Bahir Dar City Administrative, Northwest Ethiopia. *Annals of general psychiatry*. 2020;19:18.
45. Sweileh WM, Abu-Hadeed HM, Al-Jabi SW, Zyoud SH. Prevalence of depression among people with type 2 diabetes mellitus: a cross sectional study in Palestine. *BMC public health*. 2014;14:163.
46. Qiu S, Sun H, Liu Y, Kanu JS, Li R, Yu Y, et al. Prevalence and correlates of psychological distress among diabetes mellitus adults in the Jilin province in China: a cross-sectional study. *PeerJ*. 2017;5:e2869.
47. Raval A, Dhanaraj E, Bhansali A, Grover S, Tiwari P. Prevalence and determinants of depression in type 2 diabetes patients in a tertiary care centre. *The Indian journal of medical research*. 2010;132:195-200.
48. Joshi S, Dhungana RR, Subba UK. Illness Perception and Depressive Symptoms among Persons with Type 2 Diabetes Mellitus: An Analytical Cross-Sectional Study in Clinical Settings in Nepal. *Journal of diabetes research*. 2015;2015:908374.



- 1
- 2
- 3
- 4 49. Ali S, Stone MA, Peters JL, Davies MJ, Khunti K. The prevalence of co-morbid depression
- 5 in adults with Type 2 diabetes: a systematic review and meta-analysis. *Diabetic medicine*
- 6 : a journal of the British Diabetic Association. 2006;23(11):1165-73.
- 7
- 8 50. Salinero-Fort MA, Gomez-Campelo P, San Andres-Rebollo FJ, Cardenas-Valladolid J,
- 9 Abanades-Herranz JC, Carrillo de Santa Pau E, et al. Prevalence of depression in patients
- 10 with type 2 diabetes mellitus in Spain (the DIADEMA Study) : results from the
- 11 MADIABETES cohort. *BMJ open*. 2018;8(9):e020768.
- 12
- 13 51. Musche V, Kohler H, Bäuerle A, Schweda A, Weismüller B, Fink M, et al. COVID-19-
- 14 Related Fear, Risk Perception, and Safety Behavior in Individuals with Diabetes.
- 15 *Healthcare*. 2021;9(4):480.
- 16
- 17 52. Moradian S, Teufel M, Jahre L, Musche V, Fink M, Dinse H, et al. Mental health burden
- 18 of patients with diabetes before and after the initial outbreak of COVID-19: predictors of
- 19 mental health impairment. *BMC public health*. 2021;21(1):2068.
- 20
- 21
- 22
- 23
- 24
- 25
- 26
- 27
- 28
- 29
- 30
- 31
- 32
- 33
- 34
- 35
- 36
- 37
- 38
- 39
- 40
- 41
- 42
- 43
- 44
- 45
- 46
- 47
- 48
- 49
- 50
- 51
- 52
- 53
- 54
- 55
- 56
- 57
- 58
- 59
- 60

## Questionnaire

### Eligibility Criteria:

**Q1: How long have you known that you have diabetes?**

Years\_\_\_\_\_ Months\_\_\_\_\_ If date is provided \_\_\_\_\_

**Q2: How long have you been residing at Pokhara Metropolitan?**

Years\_\_\_\_\_ Months\_\_\_\_\_ If date is provided \_\_\_\_\_

### Section-A: Demographic Information

**Q3. Age..... completed years**

**Q4. Gender.....**

**Q5. Ethnicity**

- |                         |                                    |                                               |
|-------------------------|------------------------------------|-----------------------------------------------|
| 0. Dalit                | 1. Disadvantaged Janajatis         | 2. Disadvantaged non-dalit Terai caste groups |
| 3. Religious Minorities | 4. Relatively advantaged Janajatis | 5. Upper caste groups                         |

**Q6. Marital Status**

- |                       |            |                         |
|-----------------------|------------|-------------------------|
| 0. Single (Unmarried) | 1. Married | 2. Separated            |
| 3. Divorced           | 4. Widowed | 5. Other (specify)..... |

**Q7. The total number of family members** (living together in the household sharing the same kitchen).....

**Q8. Type of Family**

- |            |          |             |
|------------|----------|-------------|
| 0. Nuclear | 1. Joint | 2. Extended |
|------------|----------|-------------|

**Q9. Educational Level**

- |                    |                                     |                            |
|--------------------|-------------------------------------|----------------------------|
| 0. Illiterate      | 1. Literate with informal education | 2. Primary Level           |
| 3. Secondary Level | 4. Higher Secondary Level           | 5. Undergraduate and above |

**Q10. What was your main occupation within the past year?**

- |                          |                      |                                |
|--------------------------|----------------------|--------------------------------|
| 0. Unemployed            | 1. Agriculture       | 2. Service(Private/Government) |
| 3. Daily wage laborer    | 4. Own a business    | 5. Oversees employment         |
| 6. Home Maker            | 7. Retired (Pension) | 8. Retired (without Pension)   |
| 9. Others (Specify)..... |                      |                                |

### Section-B: Health-related characteristics

**Q11. What types of treatment are you currently using?**

- |                            |                            |               |
|----------------------------|----------------------------|---------------|
| 0. No treatment            | 1. Oral tablet             | 2. Insulin    |
| 3. Both tablet and insulin | 4. Only dietary management | 5. Other..... |

**Q 12. Do you use Insulin for treatment of Diabetes management?**

- |        |       |
|--------|-------|
| 1. Yes | 2. No |
|--------|-------|

**Q 13. How difficult do you feel to follow the dietary recommendation for the management of your diabetes?**

- |                  |                    |                         |
|------------------|--------------------|-------------------------|
| 0. Too difficult | 1. A bit difficult | 2. Not difficult at all |
|------------------|--------------------|-------------------------|

**Q 14. Is there any health insurance to cover the diabetes related cost**

- |                         |                                 |                               |
|-------------------------|---------------------------------|-------------------------------|
| 0. Yes, cover full cost | 1. Yes, but covers partial cost | 2. . No there is no insurance |
|-------------------------|---------------------------------|-------------------------------|

**Q 15. Do you have any complications resulted due to diabetes?**

- |        |       |                                  |
|--------|-------|----------------------------------|
| 0. Yes | 1. No | If yes continue, if No go to Q18 |
|--------|-------|----------------------------------|

**Q 16. What are the complications resulted due to diabetes? (Multiple choices)**

- |                           |                    |                       |
|---------------------------|--------------------|-----------------------|
| 0. Cardiovascular disease | 1. Neuropathy      | 2. Nephropathy        |
| 3. Retinopathy            | 4. Skin conditions | 5. Hearing impairment |
|                           |                    | 6. Other_____         |

**Q 17. Number of complications**\_\_\_\_\_

**Q 18. Do you have any other chronic illness other than these complications?**

- |        |       |
|--------|-------|
| 0. Yes | 1. No |
|--------|-------|

If yes continue, if No go to Q 21

**Q 19. What are the chronic illness other than these complications that you have which was before you were diagnosed with Diabetes? (Multiple choices)**

0. Hypertension                      1. Hyperlipidemia                      2. Chronic Kidney condition (not resulted after Diabetes)
3. Cardiovascular disease not resulted after Diabetes                      4. COPD                      5. Thyroid                      6. Other \_\_\_\_\_

**Q 20. Number of additional illness (comorbidities) \_\_\_\_\_**

**Q 21: Section D- Patient Health Questionnaire (PHQ-9)**

Over the last 2 weeks, how often have you been bothered by any of the following problems?  
(Use “√” to indicate your answer)

|                                                                                                                                                                              | Not at all | Several Days | More than half the days of week | Nearly every day |
|------------------------------------------------------------------------------------------------------------------------------------------------------------------------------|------------|--------------|---------------------------------|------------------|
| 1. Little interest or pleasure in doing things                                                                                                                               | 0          | 1            | 2                               | 3                |
| 2. Feeling down, depressed or hopeless                                                                                                                                       | 0          | 1            | 2                               | 3                |
| 3. Trouble falling or staying asleep or sleeping too much                                                                                                                    | 0          | 1            | 2                               | 3                |
| 4. Feeling tired or having little energy                                                                                                                                     | 0          | 1            | 2                               | 3                |
| 5. Poor appetite or overeating                                                                                                                                               | 0          | 1            | 2                               | 3                |
| 6. Feeling bad about yourself- or that you are a failure or have let yourself or your family down                                                                            | 0          | 1            | 2                               | 3                |
| 7. Trouble concentrating on things, such as reading the newspaper or watching television                                                                                     | 0          | 1            | 2                               | 3                |
| 8. Moving or speaking so slowly that other people could have noticed? Or the opposite - being so fidgety or restless that you have been moving around a lot more than usual? | 0          | 1            | 2                               | 3                |
| 9. Thoughts that you would be better off dead, or of hurting yourself in some way?                                                                                           | 0          | 1            | 2                               | 3                |

**Q 22: Section E- Hospital Anxiety and Depression Scale-Anxiety Subscale**

Please tick the statement about how you have been feeling in the past week. Don't take too long over you replies: your immediate is best.

- A1. I feel tense or 'wound up':
3. Most of the time                      2. A lot of the time
1. From time to time, occasionally                      0. Not at all
- A2. I get a sort of frightened feeling like 'butterflies' in the stomach
3. Very Often                      2. Quite Often
1. Occasionally                      0. Not at all
- A3. I get a sort of frightened feeling as if something awful is about to happen
3. Very definitely and quite badly                      2. Yes, but not too badly
1. A little, but it doesn't worry me                      0. Not at all
- A4. I feel restless as I have to be on the move:
3. Very much indeed                      2. Quite a lot
1. Not very much                      0. Not at all
- A5. Worrying thoughts go through my mind:
3. A great deal of the time                      2. A lot of the time
1. From time to time, but not too often                      0. Only occasionally
- A6. I get sudden feeling of panic

3. Very Often  
1. Not very often
2. Quite Often  
0. Not at all
- A7. I can sit at ease and feel relaxed  
0. Definitely  
2. Not often
1. Usually  
3. Not at all

**Section F: History of Disease and Lifestyle Factors**

Q23. Have you ever been diagnosed with any mental distress such as depression, anxiety or so on?  
0. Yes  
1. No

If Yes, specify.....

Q24. In your family, has anyone in the last three generations been diagnosed with any mental distress such as depression, anxiety or so on?

0. Yes  
1. No  
2. Don't Know

If Yes, specify.....

Q25. In the past one month have you ever used any tobacco products (smoking, chewing tobacco) ?

0. Yes  
1. No

Q26. In the past one month have you ever consumed any hard drink or alcohol?

0. Yes  
1. No

Q27. How many hours in an average do you sleep in a day? (based on the average of past one week)

Sleep hours.....hrs per day

Q28. Are you satisfied with your sleep quality and duration?

0. Satisfied  
1. Not Satisfied

**Section G: COVID-19 Status**

Q.29. Have you ever got tested for COVID-19?

0. Yes  
1. No

Q.30 what was the result

0. Positive  
1. Negative  
2. Never Tested

Q.31 Have you received any COVID-19 vaccine?

0. Yes, Received vaccine  
1. No, didn't received vaccine

Q.32 Have you received complete two doses?

0. Complete vaccine dose  
1. Incomplete vaccine dose  
2. Didn't received vaccine

Q 33: Please respond to each item by ticking (√) one of the five (5) responses that reflects how you feel, think or act toward COVID-19

| Fear of COVID-19 Items                                                                      | Strongly Disagree | Disagree | Neutral | Agree | Strongly Agree |
|---------------------------------------------------------------------------------------------|-------------------|----------|---------|-------|----------------|
| 1. I am most afraid of Corona                                                               | 1                 | 2        | 3       | 4     | 5              |
| 2. It makes me uncomfortable to think about Corona                                          | 1                 | 2        | 3       | 4     | 5              |
| 3. My hands become clammy when I think about Corona                                         | 1                 | 2        | 3       | 4     | 5              |
| 4. I am afraid of losing my life because of Corona                                          | 1                 | 2        | 3       | 4     | 5              |
| 5. When I watch news and stories about Corona on social media, I become nervous or anxious. | 1                 | 2        | 3       | 4     | 5              |
| 6. I cannot sleep because I'm worrying about getting Corona infection/ reinfection.         | 1                 | 2        | 3       | 4     | 5              |
| 7. My heart races or palpitates when I think about getting Corona infection/ reinfection.   | 1                 | 2        | 3       | 4     | 5              |

**Q 34. Section C. Multidimensional Scale of Perceived Social Support**

We are interested in how you feel about the following statements. Read each statement carefully. Indicate how you feel about each statement by selecting one for seven options at each statement-making a circle.

|                                                                       | Very Strongly Disagree | Strongly Disagree | Mildly Disagree | Neutral | Mildly Agree | Strongly Agree | Very Strongly Agree |
|-----------------------------------------------------------------------|------------------------|-------------------|-----------------|---------|--------------|----------------|---------------------|
| 1. I get the emotional help & support I need from my family           | 1                      | 2                 | 3               | 4       | 5            | 6              | 7                   |
| 2. I can talk about my problems with my family.                       | 1                      | 2                 | 3               | 4       | 5            | 6              | 7                   |
| 3. My family really tries to help me.                                 | 1                      | 2                 | 3               | 4       | 5            | 6              | 7                   |
| 4. My family is willing to help me make decisions.                    | 1                      | 2                 | 3               | 4       | 5            | 6              | 7                   |
| 5. I have friends with whom I can share my joys and sorrows.          | 1                      | 2                 | 3               | 4       | 5            | 6              | 7                   |
| 6. I can talk about my problems with my friends.                      | 1                      | 2                 | 3               | 4       | 5            | 6              | 7                   |
| 7. My friends really try to help me.                                  | 1                      | 2                 | 3               | 4       | 5            | 6              | 7                   |
| 8. I can count on my friends when things go wrong                     | 1                      | 2                 | 3               | 4       | 5            | 6              | 7                   |
| 9. There is a special person who is around when I am in need.         | 1                      | 2                 | 3               | 4       | 5            | 6              | 7                   |
| 10. There is a special person with whom I can share joys and sorrows. | 1                      | 2                 | 3               | 4       | 5            | 6              | 7                   |
| 11. I have a special person who is a real source of comfort to me     | 1                      | 2                 | 3               | 4       | 5            | 6              | 7                   |
| 12. There is a special person in my life who cares about my feelings. | 1                      | 2                 | 3               | 4       | 5            | 6              | 7                   |

Thank you for your participation

To Be filled by Investigator

Remark by the data collector

.....  
Signature of the Data collector

STROBE Statement—Checklist of items that should be included in reports of *cross-sectional studies*

|                              | Item No | Recommendation                                                                                                                                                                                    | Page No |
|------------------------------|---------|---------------------------------------------------------------------------------------------------------------------------------------------------------------------------------------------------|---------|
| <b>Title and abstract</b>    | 1       | (a) Indicate the study's design with a commonly used term in the title or the abstract                                                                                                            | 1,2     |
|                              |         | (b) Provide in the abstract an informative and balanced summary of what was done and what was found                                                                                               | 2       |
| <b>Introduction</b>          |         |                                                                                                                                                                                                   |         |
| Background/rationale         | 2       | Explain the scientific background and rationale for the investigation being reported                                                                                                              | 3,4     |
| Objectives                   | 3       | State specific objectives, including any prespecified hypotheses                                                                                                                                  | 4       |
| <b>Methods</b>               |         |                                                                                                                                                                                                   |         |
| Study design                 | 4       | Present key elements of study design early in the paper                                                                                                                                           | 5       |
| Setting                      | 5       | Describe the setting, locations, and relevant dates, including periods of recruitment, exposure, follow-up, and data collection                                                                   | 5       |
| Participants                 | 6       | (a) Give the eligibility criteria, and the sources and methods of selection of participants                                                                                                       | 5       |
| Variables                    | 7       | Clearly define all outcomes, exposures, predictors, potential confounders, and effect modifiers. Give diagnostic criteria, if applicable                                                          | 6       |
| Data sources/<br>measurement | 8*      | For each variable of interest, give sources of data and details of methods of assessment (measurement). Describe comparability of assessment methods if there is more than one group              | 6       |
| Bias                         | 9       | Describe any efforts to address potential sources of bias                                                                                                                                         | 7       |
| Study size                   | 10      | Explain how the study size was arrived at                                                                                                                                                         | 5       |
| Quantitative variables       | 11      | Explain how quantitative variables were handled in the analyses. If applicable, describe which groupings were chosen and why                                                                      | 6,7     |
| Statistical methods          | 12      | (a) Describe all statistical methods, including those used to control for confounding                                                                                                             | 7       |
|                              |         | (b) Describe any methods used to examine subgroups and interactions                                                                                                                               |         |
|                              |         | (c) Explain how missing data were addressed                                                                                                                                                       | 7       |
|                              |         | (d) If applicable, describe analytical methods taking account of sampling strategy                                                                                                                |         |
|                              |         | (e) Describe any sensitivity analyses                                                                                                                                                             |         |
| <b>Results</b>               |         |                                                                                                                                                                                                   |         |
| Participants                 | 13*     | (a) Report numbers of individuals at each stage of study—eg numbers potentially eligible, examined for eligibility, confirmed eligible, included in the study, completing follow-up, and analysed | 7       |
|                              |         | (b) Give reasons for non-participation at each stage                                                                                                                                              |         |
|                              |         | (c) Consider use of a flow diagram                                                                                                                                                                |         |
| Descriptive data             | 14*     | (a) Give characteristics of study participants (eg demographic, clinical, social) and information on exposures and potential confounders                                                          | 7,8,9   |
|                              |         | (b) Indicate number of participants with missing data for each variable of interest                                                                                                               | 7       |
| Outcome data                 | 15*     | Report numbers of outcome events or summary measures                                                                                                                                              | 7,8,9   |

1  
2  
3  
4  
5  
6  
7  
8  
9  
10  
11  
12  
13  
14  
15  
16  
17  
18  
19  
20  
21  
22  
23  
24  
25  
26  
27  
28  
29  
30  
31  
32  
33  
34  
35  
36  
37  
38  
39  
40  
41  
42  
43  
44  
45  
46  
47  
48  
49  
50  
51  
52  
53  
54  
55  
56  
57  
58  
59  
60

|                          |    |                                                                                                                                                                                                              |          |
|--------------------------|----|--------------------------------------------------------------------------------------------------------------------------------------------------------------------------------------------------------------|----------|
| Main results             | 16 | (a) Give unadjusted estimates and, if applicable, confounder-adjusted estimates and their precision (eg, 95% confidence interval). Make clear which confounders were adjusted for and why they were included | 10,11,12 |
|                          |    | (b) Report category boundaries when continuous variables were categorized                                                                                                                                    |          |
|                          |    | (c) If relevant, consider translating estimates of relative risk into absolute risk for a meaningful time period                                                                                             |          |
| Other analyses           | 17 | Report other analyses done—eg analyses of subgroups and interactions, and sensitivity analyses                                                                                                               | 10,11,12 |
| <b>Discussion</b>        |    |                                                                                                                                                                                                              |          |
| Key results              | 18 | Summarise key results with reference to study objectives                                                                                                                                                     | 12,13,14 |
| Limitations              | 19 | Discuss limitations of the study, taking into account sources of potential bias or imprecision. Discuss both direction and magnitude of any potential bias                                                   | 15       |
| Interpretation           | 20 | Give a cautious overall interpretation of results considering objectives, limitations, multiplicity of analyses, results from similar studies, and other relevant evidence                                   | 15       |
| Generalisability         | 21 | Discuss the generalisability (external validity) of the study results                                                                                                                                        | 15       |
| <b>Other information</b> |    |                                                                                                                                                                                                              |          |
| Funding                  | 22 | Give the source of funding and the role of the funders for the present study and, if applicable, for the original study on which the present article is based                                                | 16       |

\*Give information separately for exposed and unexposed groups.

**Note:** An Explanation and Elaboration article discusses each checklist item and gives methodological background and published examples of transparent reporting.



# BMJ Open

## Anxiety and depression among people with type 2 diabetes visiting diabetes clinics of Pokhara Metropolitan, Nepal: a cross-sectional study

|                                 |                                                                                                                                                                                                                                                                                                                                                                                                                                                                                                                                                                                                                                            |
|---------------------------------|--------------------------------------------------------------------------------------------------------------------------------------------------------------------------------------------------------------------------------------------------------------------------------------------------------------------------------------------------------------------------------------------------------------------------------------------------------------------------------------------------------------------------------------------------------------------------------------------------------------------------------------------|
| Journal:                        | <i>BMJ Open</i>                                                                                                                                                                                                                                                                                                                                                                                                                                                                                                                                                                                                                            |
| Manuscript ID                   | bmjopen-2022-064490.R2                                                                                                                                                                                                                                                                                                                                                                                                                                                                                                                                                                                                                     |
| Article Type:                   | Original research                                                                                                                                                                                                                                                                                                                                                                                                                                                                                                                                                                                                                          |
| Date Submitted by the Author:   | 17-Jan-2023                                                                                                                                                                                                                                                                                                                                                                                                                                                                                                                                                                                                                                |
| Complete List of Authors:       | Paudel, Shishir; Manmohan Memorial Institute of Health Sciences, Department of Public Health<br>Khanal, Shankar; Tribhuvan University, Central Department of Statistics<br>Gautam, Sujana; Manmohan Memorial Institute of Health Sciences, Department of Public Health<br>Chalise, Anisha; Tribhuvan University Institute of Medicine, Central Department of Public Health; Center for Research on Environment Health & Population Activities (CREHPA)<br>Koirala, Tara ; Pokhara Super Speciality Health Clinic<br>Marahatta, Sujana; Manmohan Memorial Institute of Health Sciences, Department of Public Health; Nepal Open University, |
| <b>Primary Subject Heading</b>: | Mental health                                                                                                                                                                                                                                                                                                                                                                                                                                                                                                                                                                                                                              |
| Secondary Subject Heading:      | Diabetes and endocrinology, Epidemiology, Public health                                                                                                                                                                                                                                                                                                                                                                                                                                                                                                                                                                                    |
| Keywords:                       | Anxiety disorders < PSYCHIATRY, Depression & mood disorders < PSYCHIATRY, DIABETES & ENDOCRINOLOGY, MENTAL HEALTH                                                                                                                                                                                                                                                                                                                                                                                                                                                                                                                          |
|                                 |                                                                                                                                                                                                                                                                                                                                                                                                                                                                                                                                                                                                                                            |

SCHOLARONE™  
Manuscripts



I, the Submitting Author has the right to grant and does grant on behalf of all authors of the Work (as defined in the below author licence), an exclusive licence and/or a non-exclusive licence for contributions from authors who are: i) UK Crown employees; ii) where BMJ has agreed a CC-BY licence shall apply, and/or iii) in accordance with the terms applicable for US Federal Government officers or employees acting as part of their official duties; on a worldwide, perpetual, irrevocable, royalty-free basis to BMJ Publishing Group Ltd ("BMJ") its licensees and where the relevant Journal is co-owned by BMJ to the co-owners of the Journal, to publish the Work in this journal and any other BMJ products and to exploit all rights, as set out in our [licence](#).

The Submitting Author accepts and understands that any supply made under these terms is made by BMJ to the Submitting Author unless you are acting as an employee on behalf of your employer or a postgraduate student of an affiliated institution which is paying any applicable article publishing charge ("APC") for Open Access articles. Where the Submitting Author wishes to make the Work available on an Open Access basis (and intends to pay the relevant APC), the terms of reuse of such Open Access shall be governed by a Creative Commons licence – details of these licences and which [Creative Commons](#) licence will apply to this Work are set out in our licence referred to above.

Other than as permitted in any relevant BMJ Author's Self Archiving Policies, I confirm this Work has not been accepted for publication elsewhere, is not being considered for publication elsewhere and does not duplicate material already published. I confirm all authors consent to publication of this Work and authorise the granting of this licence.

## **Anxiety and depression among people with type 2 diabetes visiting diabetes clinics of Pokhara Metropolitan, Nepal: a cross-sectional study**

**Shishir Paudel<sup>1</sup>, Shankar Prasad Khanal<sup>2</sup>, Sujan Gautam<sup>1</sup>, Anisha Chalise<sup>3</sup>, Tara Nath Koirala<sup>4</sup>, Sujan Babu Marahatta<sup>1,5</sup>**

<sup>1</sup> Department of Public Health, Manmohan Memorial Institute of Health Sciences, Kathmandu, Nepal

<sup>2</sup> Central Department of Statistics, Tribhuvan University, Kathmandu, Nepal

<sup>3</sup> Center for Research on Environment Health & Population Activities (CREHPA), Kusunti, Lalitpur, Nepal

<sup>4</sup> Pokhara Super Speciality Health Clinic, Consultant Endocrinologist, Pokhara, Nepal

<sup>5</sup> Nepal Open University, Nepal

| Authors                                       | Institution Affiliation                                                                             |
|-----------------------------------------------|-----------------------------------------------------------------------------------------------------|
| 1 <sup>st</sup> Author: Shishir Paudel        | Department of Public Health, Manmohan Memorial Institute of Health Sciences, Kathmandu, Nepal       |
| 2 <sup>nd</sup> Author: Shankar Prasad Khanal | Central Department of Statistics, Tribhuvan University, Kathmandu, Nepal                            |
| 3 <sup>rd</sup> Author: Sujan Gautam          | Department of Public Health, Manmohan Memorial Institute of Health Sciences, Kathmandu, Nepal       |
| 4 <sup>th</sup> Author: Anisha Chalise        | Center for Research on Environment Health & Population Activities(CREHPA), Kusunti, Lalitpur, Nepal |
| 5 <sup>th</sup> Author: Tara Nath Koirala     | Pokhara Super Speciality Health Clinic, Consultant Endocrinologist, Pokhara, Nepal                  |
| 6 <sup>th</sup> Author: Sujan Babu Marahatta  | Department of Public Health, Manmohan Memorial Institute of Health Sciences, Kathmandu, Nepal       |

### **Correspondence to:**

Sujan Babu Marahatta

[sujan@nou.edu.np](mailto:sujan@nou.edu.np)

**Words Count: 3,208** (excluding title page, abstract, references, and tables)

**Number of tables: 7**

## ABSTRACT

**Objectives:** To estimate the prevalence of anxiety and depression and identify the associated factors among people with type 2 diabetes (T2DM) visiting diabetes clinics of Pokhara Metropolitan, Nepal.

**Design:** Cross-sectional study.

**Setting:** Three diabetes clinics in Pokhara Metropolitan, Nepal, from May to July 2021.

**Participants:** 283 people with T2DM visiting selected diabetes centers of Pokhara Metropolitan.

**Outcome measures:** Anxiety and depression were the outcome measures. Face-to-face interviews were conducted using a structured questionnaire comprising information related to participants' socio-demographic profile and several factors along with Hospital Anxiety and Depression-Anxiety subscale (HADS-A) and Patient Health Questionnaire (PHQ-9) to assess the levels of anxiety and depression, respectively. Pearson's chi-square tests and binary logistic regression were performed to examine association between dependent and independent variables at 5% level of significance.

**Results:** The prevalence of anxiety and depression were 31.4% (95% CI 26.2%-37.5%) and 36.4% (95% CI 30.8%-42.0%), respectively. Anxiety was found to be associated with a lower level of perceived social support (adjusted odds ratio [AOR] 2.442, 95% CI 1.020-5.845), multiple complications (AOR 2.758, 95% CI 1.015-7.334) and comorbidities (AOR 2.110, 95% CI 1.004-4.436), severe COVID-19 fear (AOR 2.343, 95% CI 1.123-4.887), and sleep dissatisfaction (AOR 1.912, 95% CI 1.073-3.047). Economical dependency (AOR 1.890, 95% CI 1.026-3.482), no insurance (AOR 2.973, 95% CI 1.134-7.093), lower perceived social support (AOR 2.883, 95% CI 1.158-7.181), multiple complications (AOR 2.308, 95% CI 1.585-6.422) and comorbidities (AOR 2.575, 95% CI 1.180-5.617), severe COVID-19 fear (AOR 2.117, 95% CI 1.009-4.573), alcohol use (AOR 2.401, 95% CI 1.199-4.806), and sleep dissatisfaction (AOR 1.995, 95% CI 1.093-3.644) were found to be associated with depression.

**Conclusion:** This study showed high prevalence levels of anxiety and depression among people with T2DM. Strengthening social support and focusing on people with diabetes suffering from comorbidity and complications could help to reduce their risk of mental health problems.

**Keywords:** Anxiety, Depression, Type 2 Diabetes, Prevalence, Risk Factors, Psychological distress

### **Strengths and limitations of this study**

- The study used validated screening tools to assess the levels of anxiety, depression, and perceived social support.
- The study was conducted in the three most sought after health facilities of Pokhara Metropolitan, and the participants were recruited via a systematic random sampling technique, ensuring that the sample represented the people living with type 2 diabetes in the metropolitan area.
- Although the study was performed in one of the largest metropolitan cities of Nepal, the prevalence of anxiety and depression reported in this study might be higher than the actual prevalence present at the community level, as it was a health institution-based study conducted at the time of the COVID-19 pandemic.

### **INTRODUCTION**

Diabetes mellitus is a systemic disease that may affect various body systems leading to blindness, kidney failure, and lower limb amputation as its long-term complications.<sup>[1-3]</sup> As of 2019, nearly one in ten people were living with diabetes with a prediction that globally 578 million people will have diabetes by the year 2030.<sup>[4]</sup> Its prevalence has been skyrocketing in low and middle-income countries than in high-income countries.<sup>[5]</sup> A systematic review from 2021 based on publications from 2000-2020 noted the pooled prevalence of type 2 diabetes (T2DM) in Nepal at 10 percent with a higher prevalence observed in studies published between the years 2015 and 2020, which was at 11.24 percent.<sup>[6]</sup>

Mental distress is an emotional state which manifests with the symptoms ranging from somatic symptoms such as sleep problems, headache, and backache to depression, anxiety, and distress.<sup>[7]</sup> Globally, the prevalence of psychological distress, primarily depression and anxiety disorders are higher among people living with diabetes as compared to their counterparts.<sup>[8-10]</sup> A systematic review estimated the global prevalence of depression among people with T2DM at 28 percent, with Asia having the highest rate of depression at 32 percent.<sup>[11]</sup> Similarly, another systematic review observed generalized anxiety disorder to be present among 14 percent of people with

1  
2  
3 T2DM.<sup>[12]</sup> In Nepal, a cross-sectional study performed among people with T2DM attending  
4 tertiary care centers in Kathmandu valley found the rate of depression to be 40.3 percent in the  
5 year 2013.<sup>[13]</sup> Similarly, a study conducted in a community setting of Duhabi-Bhaluwa  
6 Municipality of Sunsari District in 2019 revealed the prevalence of depression among people with  
7 T2DM to be 22.7 percent. <sup>[14]</sup>  
8  
9

10  
11  
12 Diabetes care mainly consists of self-care aimed to prevent acute and chronic complications. The  
13 person living with diabetes is responsible for balancing their food intake, physical activities and  
14 monitoring blood glucose levels as much as possible.<sup>[15]</sup> Mental health complications, mainly  
15 anxiety and depression, complicate living with diabetes and its management in several ways. The  
16 presence of depression and anxiety could worsen the prognosis of diabetes by reducing the patients'  
17 ability for self-care and increasing non-compliance to treatments while increasing the risk of  
18 serious short- and long-term complications such as blindness, amputations, stroke, decreased  
19 quality of life, and even premature death.<sup>[16, 17]</sup> Additionally, severe anxiety disorders largely  
20 overlap with symptoms of hypoglycemia which requires immediate treatment. However, people  
21 with diabetes might fail to differentiate the feelings of hypoglycemia with anxiety. The preexisting  
22 anxiety of injections or blood draws might lead to panic disorders or patients' refusal to monitor  
23 their glucose levels.<sup>[18]</sup> Similarly, fear of hypoglycemia is a common source of anxiety and  
24 depression for people with diabetes and can lead them to maintain blood glucose levels above  
25 target levels.<sup>[18]</sup> The presence of diabetes is a chronic life-threatening stressor that requires  
26 significant mental and physical support and care to cope with elevated feelings of fear and  
27 distress.<sup>[19]</sup> Even in the current context of COVID-19 pandemic, people with diabetes are taken as  
28 one of the vulnerable populations at risk of infection and mortality.<sup>[20]</sup> Thus, the COVID-19  
29 pandemic might have aggregated their existing fear and distress, worsening their mental well-  
30 being. Considering this circumstance there are more serious concerns stressed over the mental  
31 health and well-being of this vulnerable population.<sup>[21, 22]</sup>  
32  
33  
34  
35  
36  
37  
38  
39  
40  
41  
42  
43  
44  
45  
46

47 There is a lack of ample information about the rates of anxiety and depression among people with  
48 diabetes along with its associated risk factors in South Asia and particularly in Nepal due to the  
49 limited studies published to date considering the mental health aspect of the people with diabetes.  
50 Thus, this study aimed to assess the prevalence and factors associated with anxiety and depression  
51 among people with type 2 diabetes visiting diabetes clinics of Pokhara Metropolitan, one of the  
52  
53  
54  
55  
56  
57  
58  
59  
60

1  
2  
3 rapidly urbanizing cities of Nepal, with an expectation that this study will provide valuable insights  
4 into mental health issues of these vulnerable population in developing nations similar to Nepal.  
5

## 6 7 **METHODS**

### 8 9 **Study design**

10  
11 This was a health facility-based cross-sectional study executed among people with type 2 diabetes  
12 residing at Pokhara Metropolitan who visited the selected healthcare institutions between May and  
13 July 2021.  
14  
15

### 16 17 **Participants**

18  
19 All people with type 2 diabetes mellitus with at least six months' history of diagnosis, attending  
20 the selected diabetes clinics were eligible participants. On the other hand, people with T2DM who  
21 were not residents of Pokhara Metropolitan for at least the past six months from the date of data  
22 collection were excluded.  
23  
24  
25

### 26 27 **Sample size determination and sampling technique**

28  
29 The sample size was determined using Cochran's formula for estimation of a proportion  
30 ( $n = z^2 pq / d^2$ ). A community-based cross-sectional study conducted in the eastern part of Nepal  
31 reported the prevalence of depression among people with T2DM to be 22.7 percent.<sup>[14]</sup> So, using  
32 this past prevalence at 5 percent allowable error and 95 percent confidence interval, the initially  
33 estimated sample size was 264 people with T2DM, which was optimized to 291 after adjusting 10  
34 percent non-response rate.  
35  
36  
37  
38

39  
40 Two government health institutions (Urban Health Promotion Center and Shishuwa Hospital) and  
41 one private clinic (Pokhara Super Speciality Health Clinic) were selected purposively. Urban  
42 Health Promotion Center and Shishuwa Hospital are the primary contact points for Social Health  
43 Insurance (SHI) and provides free diabetes-related services under the SHI scheme and also provide  
44 referral services. Thus, these were some of the most sought government institutions with an  
45 estimated 250-300 people with T2DM visiting monthly. Pokhara Super Speciality Health Clinic  
46 was one of the well-known tertiary endocrine referral centers of Pokhara with an average of 500  
47 people with diabetes visiting monthly. The people with T2DM visiting these three healthcare  
48 institutions were selected randomly using the technique based on systematic random sampling. For  
49 this, every  $k^{\text{th}}$  patient ( $800/291 = 2.74 \approx 3$ ) i.e. third patient waiting in the queue on the day of data  
50  
51  
52  
53  
54  
55  
56  
57  
58  
59  
60



1  
2  
3 collection, was enrolled as a participant. If the selected patient refused to participate or fell under  
4 exclusion criteria, then the patient next in the queue was approached for participation.  
5  
6

### 7 **Data collection**

8  
9 Face-to-face interview technique was used for data collection. The people with T2DM meeting  
10 inclusion criteria were approached and provided with the study details. Informed consent was  
11 taken from the participants before initiating the interviews. Considering participants' privacy,  
12 Pokhara Super Speciality Health Clinic provided the researcher with a separate room next to the  
13 doctors' cabin. Likewise, a small private space was provided at the corner of the doctors' cabin in  
14 Urban Health Promotion Center and Shishuwa Hospital, where the patients were directed for data  
15 collection.  
16  
17

18 The data was collected using a set of closed-ended questions consisting of three sections. The first  
19 section consisted of questions regarding socio-demographic profile of the participants including  
20 Multidimensional Scale of Perceived Social Support (MSPSS)<sup>[23]</sup> translated into Nepali language  
21 (MSPSS-N)<sup>[24]</sup> intending to measure the level of perceived social support. The second section  
22 consisted of questions regarding patient's health conditions, diabetes-related attributes, and  
23 lifestyle-related factors including COVID-19-related variables such as COVID-19 status,  
24 vaccination, and fear associated with COVID-19 based on a modification of the Fear scale of  
25 COVID-19<sup>[25]</sup>. The third section consisted of a nine-item Patient Health Questionnaire (PHQ-9)<sup>[26]</sup>  
26 intended to measure the level of depression followed by a Hospital Anxiety and Depression Scale-  
27 anxiety subscale (HASD-A)<sup>[27]</sup> intended to measure the level of anxiety.  
28  
29

30 The PHQ-9 consists of nine items measuring depressive symptoms corresponding to diagnostic  
31 criteria for major depressive disorder. Each item was scored on a four-point Likert scale (0–3) with  
32 scores ranging from 0 to 27, with higher scores reflecting greater depression severity.<sup>[26]</sup> The PHQ-  
33 9 has been translated into Nepali language and has shown a sensitivity of 0.94 and specificity of  
34 0.80 to measure depression at the cutoff of  $\geq 10$ .<sup>[28]</sup> The HADS-A consists of seven items  
35 measuring anxiety symptoms. Each item is scored on a four-point Likert scale (0-3) with total  
36 scores ranging from 0 to 21 with higher scores reflecting greater anxiety and a cutoff point of  $\geq 8$   
37 illustrating anxiety.<sup>[27]</sup> The HADS has been validated in Nepali language where the HADS-A  
38 subscale was found to have a good internal consistency with Cronbach's alpha of 0.76.<sup>[29]</sup> The data  
39 collection tool used in the present study is included as a supplemental file.  
40  
41  
42  
43  
44  
45  
46  
47  
48  
49  
50  
51  
52  
53  
54  
55  
56  
57  
58  
59  
60

### **Data processing, management and analysis**

The collected data was entered in EpiData 3.1 and exported to Statistical Package for Social Sciences (SPSS) version 22 for statistical analysis. The data was summarized in terms of frequencies and proportions. Bivariate analysis was carried out by applying Chi-square ( $\chi^2$ ) tests to identify the factors associated with anxiety and depression at 95% Confidence Interval (CI) and 5% level of significance i.e., p-value <0.05. The variables found to be significant in bivariate analysis were considered for multivariate analysis using binary logistic regression to determine the adjusted effect of each factor on the dependent variable. Prior to multivariate regression analysis, the multi-collinearity between the independent variables was tested using the Variance Inflation Factor (VIF) test, with a VIF greater than five taken as an indication of multi-collinearity between the independent variables. The Hosmer-Lemeshow test (HL test) for goodness-of-fit was also performed.

### **Ethical considerations**

The ethical approval for this study was obtained from the Institutional Review Committee of Manmohan Memorial Institute of Health Science (Registration no: MMIHS-IRC 583). Written informed consent was obtained from all the participants before conducting the study and all the information was kept confidential.

### **Patient and public involvement**

None.

## **RESULTS**

A total of 291 people with T2DM were approached for data collection, of which 283 provided complete responses to all the questions, while eight participants left in the middle of the data collection. Thus, the response rate of 97.25% for all questions was acquired, and 283 total samples were analyzed for this study. The prevalence of anxiety and depression was found to be 31.4 percent and 36.4 percent among people with T2DM respectively (Table 1). Moreover, around one-third (36%) of the participants reported having experienced suicidal ideation in the past two weeks on PHQ-9, of which six participants (2.1%) reported experiencing suicidal ideation nearly every single day.

### **Table 1: Prevalence of anxiety and depression (n=283)**

| <b>Outcome</b>        | <b>n (%)</b> | <b>95% CI</b> | <b>Outcome</b>           | <b>n (%)</b> | <b>95% CI</b> |
|-----------------------|--------------|---------------|--------------------------|--------------|---------------|
| <b>Anxiety status</b> |              |               | <b>Depression status</b> |              |               |
| Present               | 89 (31.4)    | 26.2%-37.5%   | Present                  | 103 (36.4)   | 30.8%-42.0%   |
| Absent                | 194 (68.6)   | 62.5%-73.8%   | Absent                   | 180 (63.6)   | 58.0%-69.2%   |
| <b>Anxiety level</b>  |              |               | <b>Depression level</b>  |              |               |
| No Anxiety            | 194 (68.6)   | 62.5%-73.8%   | No Depression            | 180 (63.6)   | 57.6 %-68.6%  |
| Mild Anxiety          | 62 (21.9)    | 16.6%-27.2%   | Mild Depression          | 71 (25.1)    | 20.1%-30.7%   |
| Moderate Anxiety      | 19 (6.7)     | 3.9%-9.9%     | Moderate Depression      | 22 (7.8)     | 4.6%-11.0%    |
| Severe Anxiety        | 8 (2.8)      | 1.1%-5.3%     | Severe Depression        | 10 (3.5)     | 1.8%-5.7%     |

The age of the participants in this study ranged from 33 to 88 years, with a mean age of 56.17±11.81 years. Almost half of the participants (56.9%) were male. A large majority (91.5%) of the participants reported living with their family, and nearly half of them (42.8%) reported being economically dependent. More than half of the participants (54.8%) reported to have no insurance coverage for their treatment. Likewise, one in six participants (14.5%) reported having a lower level of perceived social support. (Table 2)

**Table 2: Socio-demographic profile of the participants (n=283)**

| <b>Variables</b>               | <b>n (%)</b> |
|--------------------------------|--------------|
| <b>Age group</b>               |              |
| <40 years                      | 30 (10.6)    |
| 40-50                          | 65 (23.0)    |
| 50-60                          | 77 (27.2)    |
| ≥60 years                      | 111 (39.2)   |
| <b>Gender</b>                  |              |
| Male                           | 161 (56.9)   |
| Female                         | 122 (43.1)   |
| <b>Ethnicity</b>               |              |
| Brahmin/Chhetri                | 107 (37.8)   |
| Janajaties                     | 122 (43.1)   |
| Dalit                          | 33 (11.7)    |
| Religious minorities           | 21 (7.4)     |
| <b>Type of family</b>          |              |
| Nuclear                        | 143 (50.5)   |
| Joint/extended                 | 140 (49.4)   |
| <b>Living companion</b>        |              |
| Living alone                   | 24 (8.5)     |
| Living with family             | 259 (91.5)   |
| <b>Marital status</b>          |              |
| Married                        | 232 (82.0)   |
| Unmarried/divorced             | 13 (4.6)     |
| Widow/widower                  | 38 (13.4)    |
| <b>Education</b>               |              |
| Illiterate                     | 49 (17.3)    |
| Literate by informal education | 42 (14.8)    |
| Literate by formal education   | 192 (67.8)   |

|                                 |            |
|---------------------------------|------------|
| <b>Economic dependency</b>      |            |
| Dependent                       | 121 (42.8) |
| Independent                     | 162 (57.2) |
| <b>Health insurance</b>         |            |
| Full coverage                   | 42 (14.8)  |
| Partial coverage                | 86 (30.4)  |
| No insurance                    | 155 (54.8) |
| <b>Perceived social support</b> |            |
| Low support                     | 41 (14.5)  |
| Moderate support                | 130 (45.9) |
| High support                    | 112 (39.6) |

Out of all 283 participants, almost half (46.3%) reported to have lived with diabetes for more than four years of their life. A quarter (25.1%) of the participants reported having experienced complications related to diabetes, whereas more than half (55.5%) reported having other comorbidities existing before they got diagnosed with diabetes. Nearly three out of four (71.0%) participants reported having a fear of COVID-19 infection (Table 3).

**Table 3: Health and lifestyle-related characteristics of the participants (n=283)**

| Variables                                      | n (%)      |
|------------------------------------------------|------------|
| <b>Duration of illness</b>                     |            |
| ≤ 4 years                                      | 152 (53.7) |
| >4 years                                       | 131 (46.3) |
| <b>Use of insulin</b>                          |            |
| Yes                                            | 33 (12.0)  |
| No                                             | 250 (88.0) |
| <b>Presence of complications</b>               |            |
| None                                           | 212 (74.9) |
| Single complications                           | 47 (16.6)  |
| Two or more                                    | 24 (8.5)   |
| <b>Presence of comorbidities</b>               |            |
| None                                           | 126 (44.5) |
| Single comorbidity                             | 84 (29.7)  |
| Two or more                                    | 73 (25.8)  |
| <b>Difficulty following a recommended diet</b> |            |
| Too difficult                                  | 63 (22.3)  |
| A bit difficult                                | 100 (35.3) |
| Not difficult at all                           | 120 (42.4) |
| <b>History of mental illness</b>               |            |
| Yes                                            | 16 (5.7)   |
| No                                             | 267 (94.3) |
| <b>Ever tested for COVID-19</b>                |            |
| Tested negative                                | 31 (11.0)  |
| Tested positive                                | 28 (9.9)   |
| Never tested                                   | 224 (79.1) |
| <b>COVID-19 vaccination</b>                    |            |
| Complete vaccination                           | 28 (9.9)   |
| Incomplete vaccination                         | 65 (23.0)  |

|                           |            |
|---------------------------|------------|
| Didn't receive vaccine    | 190 (67.1) |
| <b>COVID-19 fear</b>      |            |
| Low fear                  | 105 (37.1) |
| Moderate fear             | 96 (33.9)  |
| Severe fear               | 82 (29.0)  |
| <b>Alcohol use</b>        |            |
| Yes                       | 75 (26.5)  |
| No                        | 208 (73.5) |
| <b>Tobacco use</b>        |            |
| Yes                       | 55 (19.4)  |
| No                        | 228 (80.6) |
| <b>Sleep satisfaction</b> |            |
| Satisfied                 | 180 (63.6) |
| Not satisfied             | 103 (36.4) |

In bivariate analysis, participants' family type, living companionship and perceived level of social support were the socio-demographic factors found to be associated with anxiety. Similarly, living companionship, economic dependency, insurance coverage for diabetes care, and perceived level of social support were the socio-demographic factors found to be associated with depression at 5% level of significance (Table 4).

**Table 4: Association of socio-demographic variables with anxiety and depression (n=283)**

| Socio-demographic variables | Anxiety       |              | $\chi^2$ (p-value) | Depression    |              | $\chi^2$ (p-value) |
|-----------------------------|---------------|--------------|--------------------|---------------|--------------|--------------------|
|                             | Presence n(%) | Absence n(%) |                    | Presence n(%) | Absence n(%) |                    |
| <b>Age group</b>            |               |              |                    |               |              |                    |
| <40 years                   | 11 (12.4)     | 19 (9.8)     | 1.006<br>(0.800)   | 13 (12.6)     | 17 (9.4)     | 5.741<br>(0.125)   |
| 40-50                       | 19 (21.3)     | 46 (23.7)    |                    | 16 (15.5)     | 49 (27.2)    |                    |
| 50-60                       | 22 (24.7)     | 55 (28.4)    |                    | 28 (27.2)     | 49 (27.2)    |                    |
| ≥60 years                   | 37 (41.6)     | 74 (38.1)    |                    | 46 (44.7)     | 65 (36.1)    |                    |
| <b>Gender</b>               |               |              |                    |               |              |                    |
| Male                        | 54 (60.7)     | 107 (55.2)   | 0.758<br>(0.384)   | 59 (57.3)     | 102 (56.7)   | 0.010<br>(0.920)   |
| Female                      | 35 (39.3)     | 87 (44.8)    |                    | 44 (42.7)     | 78 (43.3)    |                    |
| <b>Ethnicity</b>            |               |              |                    |               |              |                    |
| Brahmin/Chhetri             | 42 (47.2)     | 65 (33.5)    | 4.953<br>(0.175)   | 38 (36.9)     | 69 (38.3)    | 2.889<br>(0.409)   |
| Janajaties                  | 33 (37.1)     | 89 (45.9)    |                    | 44 (42.7)     | 78 (43.3)    |                    |
| Dalit                       | 9 (10.1)      | 24 (12.4)    |                    | 10 (9.7)      | 23 (12.8)    |                    |
| Religious minorities        | 5 (5.6)       | 16 (8.2)     |                    | 11 (10.7)     | 10 (5.6)     |                    |
| <b>Type of family</b>       |               |              |                    |               |              |                    |
| Nuclear                     | 53 (59.6)     | 90 (46.4)    | 4.226<br>(0.040)*  | 59 (57.3)     | 84 (46.7)    | 2.953<br>(0.086)   |
| Joint/extended              | 36 (40.4)     | 104 (53.6)   |                    | 44 (42.7)     | 96 (53.3)    |                    |
| <b>Living companion</b>     |               |              |                    |               |              |                    |
| Living alone                | 13 (14.6)     | 11 (5.7)     | 6.278<br>(0.012)*  | 15 (14.6)     | 9 (5.0)      | 7.719<br>(0.005)*  |
| Living with family          | 76 (85.4)     | 183 (94.3)   |                    | 88 (85.4)     | 171 (95.0)   |                    |
| <b>Marital status</b>       |               |              |                    |               |              |                    |
| Married                     | 72 (80.9)     | 160 (82.2)   | 1.433<br>(0.489)   | 78 (75.7)     | 154 (85.6)   | 5.464<br>(0.065)   |
| Unmarried/divorced          | 6 (6.7)       | 7 (3.6)      |                    | 8 (7.8)       | 5 (2.8)      |                    |
| Widow/widower               | 11 (12.4)     | 27 (13.9)    |                    | 17 (16.5)     | 21 (11.7)    |                    |
| <b>Education</b>            |               |              |                    |               |              |                    |
| Illiterate                  | 15 (16.9)     | 34 (17.5)    | 1.880              | 21 (20.4)     | 28 (15.6)    | 2.419              |

|                                 |           |            |                             |           |            |                             |
|---------------------------------|-----------|------------|-----------------------------|-----------|------------|-----------------------------|
| Literate by informal education  | 17 (19.1) | 25 (12.9)  | (0.391)                     | 18 (17.5) | 24 (13.3)  | (0.298)                     |
| Literate by formal education    | 57 (64.0) | 135 (69.6) |                             | 64 (62.1) | 128 (71.1) |                             |
| <b>Economic dependency</b>      |           |            |                             |           |            |                             |
| Dependent                       | 41 (46.1) | 80 (41.2)  | 0.582                       | 55 (53.4) | 66 (36.7)  | 7.493                       |
| Independent                     | 48 (53.9) | 114 (58.8) | (0.446)                     | 48 (46.6) | 114 (63.3) | (0.006)*                    |
| <b>Health insurance</b>         |           |            |                             |           |            |                             |
| Full coverage                   | 9 (10.1)  | 33 (17.0)  | 2.498<br>(0.287)            | 8 (7.8)   | 34 (18.9)  | 11.287<br>(0.004)*          |
| Partial coverage                | 27 (30.3) | 59 (30.4)  |                             | 26 (25.2) | 60 (33.3)  |                             |
| No insurance                    | 53 (59.6) | 102 (52.6) |                             | 69 (67.0) | 85 (47.5)  |                             |
| <b>Perceived social support</b> |           |            |                             |           |            |                             |
| Low support                     | 20 (22.5) | 21 (10.8)  | 15.898<br>( $<0.001$ )<br>* | 25 (24.3) | 16 (8.9)   | 18.458<br>( $<0.001$ )<br>* |
| Moderate support                | 48 (53.9) | 82 (42.3)  |                             | 51 (49.5) | 79 (43.9)  |                             |
| High support                    | 21 (23.6) | 91 (46.9)  |                             | 27 (26.2) | 85 (47.2)  |                             |

\*Statistical significance at  $p < 0.05$ .

Insulin use, presence of complications and comorbidities, prior history of clinically diagnosed mental distress, fear associated with COVID-19, alcohol use and sleep satisfaction were found to be associated with both anxiety and depression status at  $p < 0.05$ . In addition, depression was also found to be associated with difficulty experienced by people with T2DM to follow dietary recommendations and use of tobacco products. (Table 5). The people with T2DM experiencing anxiety were found to be twice more likely to be depressed (unadjusted odds ratio 2.758, 95% CI 1.641-4.635) as compared to their counterparts (Table 5).

**Table 5: Association of health and lifestyle-related variables with anxiety and depression (n=283)**

| Health and lifestyle-related variables         | Anxiety       |              | $\chi^2$ (p-value)      | Depression    |              | $\chi^2$ (p-value)      |
|------------------------------------------------|---------------|--------------|-------------------------|---------------|--------------|-------------------------|
|                                                | Presence n(%) | Absence n(%) |                         | Presence n(%) | Absence n(%) |                         |
| <b>Duration of illness</b>                     |               |              |                         |               |              |                         |
| ≤ 4 years                                      | 45 (50.6)     | 107 (55.2)   | 0.518<br>(0.472)        | 49 (47.6)     | 103 (57.2)   | 2.453<br>(0.117)        |
| >4 years                                       | 44 (49.4)     | 87 (44.8)    |                         | 54 (52.4)     | 77 (42.8)    |                         |
| <b>Use of insulin</b>                          |               |              |                         |               |              |                         |
| Yes                                            | 17 (19.1)     | 16 (8.2)     | 6.977<br>(0.008)*       | 20 (19.4)     | 13 (7.2)     | 9.459<br>(0.002)*       |
| No                                             | 72 (80.9)     | 178 (91.8)   |                         | 83 (80.6)     | 167 (92.8)   |                         |
| <b>Presence of complications</b>               |               |              |                         |               |              |                         |
| None                                           | 53 (59.6)     | 159 (82.0)   | 16.502<br>( $<0.001$ )* | 63 (61.2)     | 149 (82.8)   | 16.345<br>( $<0.001$ )* |
| Single complications                           | 23 (25.8)     | 24 (12.4)    |                         | 26 (25.2)     | 21 (11.7)    |                         |
| Two or more                                    | 13 (14.6)     | 11 (5.7)     |                         | 14 (13.6)     | 10 (5.6)     |                         |
| <b>Presence of comorbidities</b>               |               |              |                         |               |              |                         |
| None                                           | 24 (27.0)     | 102 (52.6)   | 17.118<br>( $<0.001$ )* | 28 (27.2)     | 98 (54.4)    | 22.617<br>( $<0.001$ )* |
| Single comorbidity                             | 32 (36.0)     | 52 (26.8)    |                         | 35 (34.0)     | 49 (27.2)    |                         |
| Two or more                                    | 33 (37.0)     | 40 (20.6)    |                         | 40 (38.8)     | 33 (18.3)    |                         |
| <b>Difficulty following a recommended diet</b> |               |              |                         |               |              |                         |
| Too difficult                                  | 24 (27.0)     | 39 (20.1)    | 1.686<br>(0.430)        | 34 (33.0)     | 29 (16.1)    | 13.326<br>( $<0.001$ )* |
| A bit difficult                                | 29 (32.6)     | 71 (36.6)    |                         | 37 (35.9)     | 63 (35.0)    |                         |
| Not difficult at all                           | 36 (40.4)     | 84 (43.3)    |                         | 32 (31.1)     | 88 (48.9)    |                         |
| <b>History of mental illness</b>               |               |              |                         |               |              |                         |
| Yes                                            | 9 (10.1)      | 7 (3.6)      | 4.839                   | 10 (9.7)      | 6 (3.3)      | 4.992                   |

|                                 |           |            |                         |           |            |                         |
|---------------------------------|-----------|------------|-------------------------|-----------|------------|-------------------------|
| No                              | 80 (89.9) | 187 (96.4) | (0.028)*                | 93 (90.3) | 174 (96.7) | (0.025)*                |
| <b>Ever tested for COVID-19</b> |           |            |                         |           |            |                         |
| Tested negative                 | 14 (15.7) | 17 (8.8)   | 3.368<br>(0.186)        | 9 (8.7)   | 22 (12.2)  | 0.850<br>(0.654)        |
| Tested positive                 | 7 (7.9)   | 21 (10.8)  |                         | 10 (9.7)  | 18 (10.0)  |                         |
| Never tested                    | 68 (76.4) | 156 (80.4) |                         | 84 (81.6) | 140 (77.8) |                         |
| <b>COVID-19 vaccination</b>     |           |            |                         |           |            |                         |
| Complete vaccination            | 11 (12.4) | 17 (8.8)   | 1.005<br>(0.605)        | 9 (8.7)   | 19 (10.6)  | 2.508<br>(0.285)        |
| Incomplete vaccination          | 21 (23.6) | 44 (22.7)  |                         | 29 (28.2) | 36 (20.0)  |                         |
| Didn't receive vaccine          | 57 (64.0) | 133 (68.6) |                         | 65 (63.1) | 125 (69.4) |                         |
| <b>COVID-19 fear</b>            |           |            |                         |           |            |                         |
| Low fear                        | 22 (24.7) | 83 (42.8)  | 10.325<br>(0.006)*      | 27 (26.2) | 78 (43.3)  | 8.614<br>(0.013)*       |
| Moderate fear                   | 32 (36.0) | 64 (33.0)  |                         | 39 (37.9) | 57 (31.7)  |                         |
| Severe fear                     | 35 (39.3) | 47 (24.2)  |                         | 37 (35.9) | 45 (25.0)  |                         |
| <b>Alcohol use</b>              |           |            |                         |           |            |                         |
| Yes                             | 31 (34.8) | 44 (22.7)  | 4.625<br>(0.033)*       | 39 (37.9) | 36 (20.0)  | 10.733<br>(0.001)*      |
| No                              | 58 (65.2) | 150 (77.3) |                         | 64 (62.1) | 144 (80.0) |                         |
| <b>Tobacco use</b>              |           |            |                         |           |            |                         |
| Yes                             | 23 (25.8) | 32 (16.5)  | 3.405<br>(0.065)        | 27 (26.2) | 28 (15.6)  | 4.753<br>(0.029)*       |
| No                              | 66 (74.2) | 162 (83.5) |                         | 76 (73.8) | 152 (84.4) |                         |
| <b>Sleep satisfaction</b>       |           |            |                         |           |            |                         |
| Satisfied                       | 45 (50.6) | 135 (69.6) | 9.540<br>(0.002)*       | 52 (50.5) | 128 (71.1) | 12.039<br>(0.001)*      |
| Not satisfied                   | 44 (49.4) | 59 (30.4)  |                         | 51 (49.5) | 52 (28.9)  |                         |
| <b>Depression</b>               |           |            |                         |           |            |                         |
| Present                         | 47 (52.8) | 56 (28.9)  | 15.109<br>( $<0.001$ )* | -         | -          | -                       |
| Absent                          | 42 (47.2) | 138 (71.1) |                         | -         | -          |                         |
| <b>Anxiety</b>                  |           |            |                         |           |            |                         |
| Present                         | -         | -          | -                       | 47 (45.6) | 42 (23.3)  | 15.109<br>( $<0.001$ )* |
| Absent                          | -         | -          |                         | 56 (54.4) | 138 (76.7) |                         |

\*Statistical significance at  $p < 0.05$ .

For multivariate analysis, the Variance Inflation Factor (VIF) test among the independent variables was performed, where the highest reported VIF was 1.610, indicating that there was no issue of multi-collinearity. Lower level of perceived social support (adjusted odds ratio [AOR] 2.442, 95% CI 1.020-5.845), presence of a single (AOR 2.081, 95% CI 1.002-4.414) and multiple complications (AOR 2.758, 95% CI 1.015-7.334), presence of a single (AOR 2.127, 95% CI 1.059-4.272) and multiple comorbidities (AOR 2.110, 95% CI 1.004-4.436), severe fear of COVID-19 infection (AOR 2.343, 95% CI 1.123-4.887), and sleep dissatisfaction (AOR 1.912, 95% CI 1.073-3.047) were found to be associated with anxiety (Table 6).

**Table 6: Factors associated with anxiety among people with diabetes (n=283)**

| Factors                                  | UOR   | 95% CI      | p-value | AOR <sup>a</sup> | 95% CI      | p-value |
|------------------------------------------|-------|-------------|---------|------------------|-------------|---------|
| <b>Type of family</b>                    |       |             |         |                  |             |         |
| Nuclear                                  | 1.701 | 1.023-2.829 | 0.041*  | 1.458            | 0.784-2.711 | 0.233   |
| Joint/extended                           | Ref   |             |         | Ref              |             |         |
| <b>Living companion</b>                  |       |             |         |                  |             |         |
| Living alone                             | 2.846 | 1.221-6.633 | 0.015*  | 1.108            | 0.405-3.034 | 0.842   |
| Living with family                       | Ref   |             |         | Ref              |             |         |
| <b>Perceived level of social support</b> |       |             |         |                  |             |         |



|                                  |       |             |         |       |             |        |
|----------------------------------|-------|-------------|---------|-------|-------------|--------|
| Low support                      | 4.127 | 1.902-8.955 | <0.001* | 2.442 | 1.020-5.845 | 0.045* |
| Moderate support                 | 2.537 | 1.401-4.591 | 0.002*  | 1.839 | 0.986-3.520 | 0.060  |
| High support                     | Ref   |             |         | Ref   |             |        |
| <b>Use of insulin</b>            |       |             |         |       |             |        |
| Yes                              | 2.627 | 1.259-5.481 | 0.010*  | 1.299 | 0.565-3.166 | 0.565  |
| No                               | Ref   |             |         | Ref   |             |        |
| <b>Presence of complications</b> |       |             |         |       |             |        |
| None                             | Ref   |             |         | Ref   |             |        |
| Single complications             | 2.875 | 1.499-5.512 | 0.001*  | 2.081 | 1.002-4.414 | 0.049* |
| Two or more                      | 3.545 | 1.501-8.387 | 0.004*  | 2.758 | 1.015-7.334 | 0.044* |
| <b>Presence of comorbidities</b> |       |             |         |       |             |        |
| None                             | Ref   |             |         | Ref   |             |        |
| Single comorbidity               | 2.615 | 1.399-4.890 | 0.003*  | 2.127 | 1.059-4.272 | 0.034* |
| Two or more                      | 3.506 | 1.848-6.652 | <0.001* | 2.110 | 1.004-4.436 | 0.048* |
| <b>History of mental illness</b> |       |             |         |       |             |        |
| Yes                              | 3.005 | 1.082-8.350 | 0.035*  | 2.132 | 0.680-6.687 | 0.194  |
| No                               | Ref   |             |         | Ref   |             |        |
| <b>COVID-19 fear</b>             |       |             |         |       |             |        |
| Low fear                         | Ref   |             |         | Ref   |             |        |
| Moderate fear                    | 1.886 | 1.001-3.553 | 0.049*  | 1.491 | 0.731-3.039 | 0.272  |
| Severe fear                      | 2.809 | 1.478-5.340 | 0.002*  | 2.343 | 1.123-4.887 | 0.023* |
| <b>Alcohol use</b>               |       |             |         |       |             |        |
| Yes                              | 1.822 | 1.051-3.160 | 0.033*  | 1.639 | 0.881-3.047 | 0.119  |
| No                               | Ref   |             |         | Ref   |             |        |
| <b>Sleep satisfaction</b>        |       |             |         |       |             |        |
| Satisfied                        | Ref   |             |         | Ref   |             |        |
| Not satisfied                    | 2.237 | 1.335-3.748 | 0.002*  | 1.912 | 1.073-3.047 | 0.028* |
| <b>Depression</b>                |       |             |         |       |             |        |
| Present                          | 2.758 | 1.641-4.635 | <0.001* |       |             |        |
| Absent                           | Ref   |             |         | -     | -           | -      |

\*Statistical significance at  $p < 0.05$ . <sup>a</sup>Logistic regression model adjusted for all variables in the table except Depression, Nagelkerker R Square 0.310; Hosmer Lemeshow Chi-square 9.793,  $p = 0.280$ ; CI: confidence interval, UOR: Unadjusted odds ratio, AOR: Adjusted odds ratio.

Economic dependency (AOR 1.890, 95% CI 1.026-3.482), lower level of perceived social support (AOR 2.883, 95% CI 1.158-7.181), no insurance coverage (AOR 2.973, 95% CI 1.134-7.093), presence of multiple complications (AOR 2.308, 95% CI 1.585-6.422), presence of a single (AOR 2.262, 95% CI 1.108-4.619), and multiple comorbidities (AOR 2.575, 95% CI 1.180-5.617), difficulty following the recommended diet (AOR 2.387, 95% CI 1.100-5.182), severe fear of COVID-19 (AOR 2.117, 95% CI 1.009-4.573), alcohol use (AOR 2.401, 95% CI 1.199-4.806), and sleep dissatisfaction (AOR 1.995, 95% CI 1.093-3.644) were found to be associated with depression (Table 7).

**Table 7: Factors associated with depression among people with diabetes (n=283)**

| Factors                 | UOR   | 95% CI      | p-value | AOR <sup>a</sup> | 95% CI      | p-value |
|-------------------------|-------|-------------|---------|------------------|-------------|---------|
| <b>Living companion</b> |       |             |         |                  |             |         |
| Living alone            | 3.239 | 1.363-7.695 | 0.008*  | 1.586            | 0.553-4.548 | 0.391   |
| Living with family      | Ref   |             |         | Ref              |             |         |

|                                              |       |              |         |       |             |        |
|----------------------------------------------|-------|--------------|---------|-------|-------------|--------|
| <b>Economic dependency</b>                   |       |              |         |       |             |        |
| Dependent                                    | 1.979 | 1.210-3.236  | 0.007*  | 1.890 | 1.026-3.482 | 0.041* |
| Independent                                  | Ref   |              |         | Ref   |             |        |
| <b>Perceived level of social support</b>     |       |              |         |       |             |        |
| Low support                                  | 4.919 | 2.295-10.543 | <0.001* | 2.883 | 1.158-7.181 | 0.023* |
| Moderate support                             | 2.032 | 1.163-3.551  | 0.013*  | 1.345 | 0.696-2.599 | 0.379  |
| High support                                 | Ref   |              |         | Ref   |             |        |
| <b>Use of insulin</b>                        |       |              |         |       |             |        |
| Yes                                          | 3.095 | 1.468-6.528  | 0.003*  | 1.265 | 0.905-3.171 | 0.061  |
| No                                           | Ref   |              |         | Ref   |             |        |
| <b>Presence of complications</b>             |       |              |         |       |             |        |
| None                                         | Ref   |              |         | Ref   |             |        |
| Single complications                         | 2.928 | 1.535-5.587  | 0.010*  | 1.628 | 0.739-3.587 | 0.227  |
| Two or more                                  | 3.311 | 1.397-7.851  | 0.007*  | 2.308 | 1.858-6.422 | 0.046* |
| <b>Presence of comorbidities</b>             |       |              |         |       |             |        |
| None                                         | Ref   |              |         | Ref   |             |        |
| Single comorbidity                           | 2.500 | 1.367-4.573  | 0.003*  | 2.262 | 1.108-4.619 | 0.025* |
| Two or more                                  | 4.242 | 2.274-7.915  | <0.001* | 2.575 | 1.180-5.617 | 0.017* |
| <b>Health insurance coverage</b>             |       |              |         |       |             |        |
| Full coverage                                | Ref   |              |         | Ref   |             |        |
| Partial coverage                             | 1.842 | 0.751-4.517  | 0.182   | 1.792 | 0.613-4.691 | 0.287  |
| No insurance                                 | 3.410 | 1.483-7.842  | 0.004*  | 2.973 | 1.134-7.093 | 0.027* |
| <b>Difficulty following recommended diet</b> |       |              |         |       |             |        |
| Too difficult                                | 3.224 | 1.701-6.112  | <0.001* | 2.387 | 1.100-5.182 | 0.028* |
| A bit difficult                              | 1.615 | 1.005-2.865  | 0.046*  | 1.112 | 0.555-2.230 | 0.764  |
| Not difficult at all                         | Ref   |              |         | Ref   |             |        |
| <b>History of mental illness</b>             |       |              |         |       |             |        |
| Yes                                          | 3.118 | 1.099-8.848  | 0.033*  | 2.587 | 0.835-9.025 | 0.139  |
| No                                           | Ref   |              |         | Ref   |             |        |
| <b>COVID-19 fear</b>                         |       |              |         |       |             |        |
| Low fear                                     | Ref   |              |         | Ref   |             |        |
| Moderate fear                                | 1.977 | 1.087-3.594  | 0.025*  | 1.496 | 0.731-3.060 | 0.270  |
| Severe fear                                  | 2.375 | 1.282-4.402  | 0.006*  | 2.117 | 1.009-4.573 | 0.042* |
| <b>Alcohol use</b>                           |       |              |         |       |             |        |
| Yes                                          | 2.437 | 1.420-4.184  | 0.001*  | 2.401 | 1.199-4.806 | 0.013* |
| No                                           | Ref   |              |         | Ref   |             |        |
| <b>Tobacco use</b>                           |       |              |         |       |             |        |
| Yes                                          | 1.929 | 1.063-3.500  | 0.031*  | 1.001 | 0.461-2.174 | 0.998  |
| No                                           | Ref   |              |         | Ref   |             |        |
| <b>Sleep satisfaction</b>                    |       |              |         |       |             |        |
| Satisfied                                    | Ref   |              |         | Ref   |             |        |
| Not satisfied                                | 2.414 | 1.460-3.993  | 0.001*  | 1.995 | 1.093-3.644 | 0.025* |

\*Statistical significance at  $p < 0.05$ . <sup>a</sup> Logistic regression model adjusted for all variables in the table except Anxiety; Nagelkerker R Square 0.358; Hosmer Lemeshow Chi-square 10.073,  $p = 0.260$ ; CI: confidence interval, UOR: Unadjusted odds ratio, AOR: Adjusted odds ratio.

## DISCUSSION

1  
2  
3 In this study, around one third of the people with T2DM were found to have anxiety (31.4%) and  
4 depression (36.4%). This rate of prevalence is slightly lower than the prevalence observed by a  
5 recent study conducted among people with T2DM admitted in the tertiary hospital of Chitwan  
6 district in 2019, where anxiety and depression were reported among 57.8 percent and 49.7 percent  
7 of the participants respectively.<sup>[30]</sup> This variation in anxiety and depression might be due to the  
8 fact that the past study was conducted in hospital-admitted patients. On the other hand, this  
9 prevalence is higher than the prevalence of depression (22.7%) among T2DM patients as observed  
10 by a community-based study in Dubabi-Bhaluwa Municipality in the year 2016. <sup>[14]</sup> However, the  
11 current prevalence of depression is in line with past prevalence observed among people visiting  
12 diabetes centers in Lalitpur Metropolitan in 2019, where 35.6 percent of the people with diabetes  
13 were found to have depression.<sup>[31]</sup> These variations in the prevalence might be due to the difference  
14 in geographic location, study settings, and time factors. In the global context, a similar rate of  
15 anxiety and depression has been noted among this vulnerable population in countries of different  
16 economies such as China<sup>[32]</sup>, Saudi Arabia<sup>[33, 34]</sup>, Mexico<sup>[35]</sup>, Malaysia<sup>[36]</sup>, Pakistan<sup>[37]</sup>, and India<sup>[38]</sup>.

17  
18  
19  
20  
21  
22  
23  
24  
25  
26  
27  
28 There was a statistically significant relationship existing between the perceived level of social  
29 support and the anxiety and depression status of the people, as the people with a lower level of  
30 perceived social support had twice the odds of anxiety and depression than those with higher level  
31 of perceived social support. Similar findings were shared by studies from Saudi Arabia and  
32 Ethiopia, where higher odds of anxiety and depression were seen among people with lower social  
33 support. <sup>[34, 39]</sup> As good social support has been observed as a protective factor against anxiety and  
34 depression, studies suggest that strengthening social support in these people can improve their  
35 psychological well-being.<sup>[40, 41]</sup> Social support plays an important role in the management of  
36 diabetes. Poor social support may lead to delays in healthcare-seeking behavior as well as  
37 increased emotional distress. <sup>[34, 39, 42]</sup> This might further inflect an undesirable effect on the  
38 persons' physical and mental well-being. Thus, social support in people with diabetes could be  
39 strengthened to reduce the risk of mental distress, which could be done through frequent  
40 engagement of family members in diabetes care settings and formation of peer support groups at  
41 the diabetes centers as well as at community levels.

42  
43  
44  
45  
46  
47  
48  
49  
50  
51  
52 In this study, the presence of comorbidities as well as complications related to diabetes were  
53 observed as an important factors associated with anxiety and depression among people with  
54 T2DM. This is in line with a past study from Nepal, where people with diabetes having co-morbid  
55  
56  
57

1  
2  
3 conditions had twice the odds of depression as compared to their counterparts.<sup>[43]</sup> Likewise, a study  
4 from Ethiopia observed that people who worried about diabetes complications had six folds  
5 increase in odds of depression.<sup>[44]</sup> Similarly, people with a history of diabetes-related  
6 complications were found to have higher odds of anxiety in Mexico.<sup>[35]</sup> Studies from different parts  
7 of the world suggest that the greater the number of additional illnesses present among people with  
8 T2DM, greater the risk of anxiety and depression.<sup>[14, 45, 46]</sup> The presence of comorbidity and/or  
9 complication creates an additional financial burden due to increased treatment costs, physical  
10 burden, and chronic pain as well as social burden among the people with T2DM. <sup>[14, 46, 47]</sup> Thus,  
11 these might be contributing factors to impact their psychological well-being as it was also found  
12 that economic dependency and absence of health insurance securities were other risk factors for  
13 depression among this vulnerable group in this study. Special care should be provided to people  
14 with diabetes who are suffering from complications and co-morbid conditions. In addition, it is  
15 also essential to ensure certain financial protection, proper health counseling, and routine mental  
16 health screening services targeting this vulnerable population.

17  
18 In bivariate analysis, we observed that insulin users had twice the odds of experiencing anxiety  
19 and thrice the odds of experiencing depression as compared to those not using insulin. Similar  
20 observations were shared by the past studies from Nepal, where one study found that insulin users  
21 had twice the odds of depression as compared to oral medicine users, and another study found a  
22 nine-fold increase in depression among insulin users as compared to non-insulin users.<sup>[14, 48]</sup>  
23 Insulin therapy not only involves painful injections and regular glucose measurement but also is  
24 perceived to be used in severe cases. This perception might influence psychological distress among  
25 insulin users.<sup>[8, 14, 49, 50]</sup> However, in multivariate analyses this statistical relationship between  
26 insulin use and both anxiety and depression was ruled out in our study. This might be attributed to  
27 a small proportion of insulin users enumerated by chance in our random sample.

28  
29 We observed that the participants who were not satisfied with the duration and quality of their  
30 sleep had almost twice the odds of being anxious and depressed than those who were satisfied with  
31 their sleep. Similar to this finding, a study from China observed that people with diabetes with  
32 poor sleep quality had almost twice the odds of anxiety and depression.<sup>[32]</sup> Short sleep duration  
33 could influence psychological distress even in the general population. People with diabetes suffer  
34 from frequent urination, which might affect their quality of sleep and sleep satisfaction, leading to  
35 discomfort, agitation, and stress in long run.<sup>[46]</sup>

1  
2  
3 The severe fear of COVID-19 infection was found to be associated with both anxiety and  
4 depression. A study from Germany noted that people with diabetes tend to perceive a higher  
5 susceptibility to COVID-19 infection, think more about its severe course, and even die from  
6 COVID-19 than other general population. However, the same study revealed that there was no  
7 increase in anxiety and depressive symptoms among individuals with diabetes.<sup>[51]</sup> In contrast,  
8 another study from Germany noted that the rate of anxiety and depression increased at the time of  
9 the COVID-19 outbreak.<sup>[52]</sup> As COVID-19 is an emerging public health concern with limited  
10 understanding about its psychological impact on patients with chronic illness who are deemed as  
11 vulnerable groups, there is a need for further studies for a better understanding of its association  
12 with psychological well-being among these vulnerable populations. The fear of COVID-19  
13 pandemic has been found to have a significant relationship with anxiety and depression. While  
14 adjusting its effect, we also observed that the presence of COVID-19 pandemic does not invalidate  
15 the relationship of anxiety and depression with other factors.  
16  
17  
18  
19  
20  
21  
22  
23  
24  
25

### 26 **Limitations**

27  
28  
29 Despite being one of the few studies to assess the status and risk factors for anxiety and depression  
30 among people with type 2 diabetes mellitus in Nepal, this study is not free from its limitations. As  
31 the study was executed during the COVID-19 pandemic, the observed rate of anxiety and  
32 depression might be slightly overestimated due to the effect of the pandemic, requiring further  
33 studies. Although a larger sample size would have benefited the precision of the confidence  
34 interval, due to the time constraints and the lockdown imposed during the COVID-19 pandemic,  
35 the research team failed to cover a larger sample and only covered the minimum required sample  
36 size. The patients sampled were from selected health institutions which might have introduced  
37 some selection bias. As this study was a health institution-based study, the prevalence of anxiety  
38 and depression might be slightly higher than the actual prevalence present at the community level.  
39  
40  
41  
42  
43  
44  
45

### 46 **CONCLUSION**

47  
48  
49 The study revealed nearly one-third of the people with type 2 diabetes experienced anxiety of  
50 varying severity, and nearly two-fifths experienced depressive symptoms. Among the various  
51 factors, the level of perceived social support, presence of comorbidity and complications, severe  
52 fear of COVID-19 infection, and sleep dissatisfaction were the associated risk factors for anxiety  
53 and depression. Integrating mental health counseling services with present diabetes-related care  
54  
55  
56  
57

1  
2  
3 and support systems is essential to ease patients' physiological well-being. Further studies based  
4 on qualitative perspective could provide valuable insights into the way social supports and other  
5 associated factors are influencing the mental well-being of this vulnerable population.  
6  
7  
8  
9  
10  
11  
12

### 13 **ACKNOWLEDGEMENTS**

14  
15 We thank all the participants for their valuable time and information. We are grateful to Pokhara  
16 Super Speciality Health Clinic, Urban Health Promotion Center, and Shishuwa Hospital for their  
17 approval and support in data collection. We express our gratitude to Dr. Jasmina Gurung, Dr.  
18 Anjali Bhandari, and Mrs. Nirmala Paudel for providing a supportive environment at the time of  
19 data collection.  
20  
21  
22  
23

### 24 **CONTRIBUTORS**

25  
26 SP: as the primary investigator, lead the conceptualization of the study, and questionnaire  
27 development, collected the data, performed analysis and developed and finalized the manuscript.  
28 SBM, SPK and SG: contributed in conceptualization, analysis and interpretation of the findings  
29 and supervised the study. AC: contributed in data collection and analysis, editing and revision of  
30 the manuscript. TNK: contributed in data collection. All authors read and approved the final  
31 manuscript.  
32  
33  
34  
35  
36

### 37 **ETHICAL APPROVAL**

38  
39 The ethical approval for this study was obtained from the Institutional Review Committee of  
40 Manmohan Memorial Institute of Health Science (Registration no: MMIHS-IRC 583).  
41  
42  
43

### 44 **FUNDING**

45  
46 None declared.  
47

### 48 **COMPETING INTERESTS**

49  
50 None declared.  
51

### 52 **DATA AVAILABILITY STATEMENT**



The dataset generated and analyzed during the current study is available from the corresponding author upon reasonable request.

## REFERENCES

1. American Diabetes Association. Diagnosis and classification of diabetes mellitus. *Diabetes care*. 2009;32 Suppl 1(Suppl 1):S62-S7.
2. Saedi E, Gheini MR, Faiz F, Arami MA. Diabetes mellitus and cognitive impairments. *World J Diabetes*. 2016;7(17):412-22.
3. World Health Organization. Diabetes. Key facts. 2018. Available from: [www.who.int/news-room/fact-sheets/detail/diabetes](http://www.who.int/news-room/fact-sheets/detail/diabetes).
4. International Diabetes Federation. Diabetes Atlas reports 463 million with diabetes 2019. Available from: <https://idf.org/news/169:diabetes-atlas-reports-463-million-with-diabetes.html>.
5. World Health Organization. The top 10 causes of death 2020. Available from: <https://www.who.int/news-room/fact-sheets/detail/the-top-10-causes-of-death>.
6. Shrestha DB, Budhathoki P, Sedhai YR, Marahatta A, Lamichhane S, Nepal S, et al. Type 2 Diabetes Mellitus in Nepal from 2000 to 2020: A systematic review and meta-analysis [version 1; peer review: 3 approved with reservations]. *F1000Research*. 2021;10:543.
7. de Waal MWM, Arnold IA, Spinhoven P, Eekhof JAH, van Hemert AM. The reporting of specific physical symptoms for mental distress in general practice. *Journal of psychosomatic research*. 2005;59(2):89-95.
8. Anderson RJ, Freedland KE, Clouse RE, Lustman PJ. The prevalence of comorbid depression in adults with diabetes: a meta-analysis. *Diabetes care*. 2001;24(6):1069-78.
9. Rotella F, Mannucci E. Diabetes mellitus as a risk factor for depression. A meta-analysis of longitudinal studies. *Diabetes research and clinical practice*. 2013;99(2):98-104.
10. Lin EH, Von Korff M, Alonso J, Angermeyer MC, Anthony J, Bromet E, et al. Mental disorders among persons with diabetes--results from the World Mental Health Surveys. *Journal of psychosomatic research*. 2008;65(6):571-80.
11. Khaledi M, Haghghatdoost F, Feizi A, Aminorroaya A. The prevalence of comorbid depression in patients with type 2 diabetes: an updated systematic review and meta-analysis on huge number of observational studies. *Acta diabetologica*. 2019;56(6):631-50.
12. Grigsby AB, Anderson RJ, Freedland KE, Clouse RE, Lustman PJ. Prevalence of anxiety in adults with diabetes: a systematic review. *Journal of psychosomatic research*. 2002;53(6):1053-60.
13. Niraula K, Kohrt BA, Flora MS, Thapa N, Mumu SJ, Pathak R, et al. Prevalence of depression and associated risk factors among persons with type-2 diabetes mellitus without a prior psychiatric history: a cross-sectional study in clinical settings in urban Nepal. *BMC psychiatry*. 2013;13(1):309.
14. Sunny AK, Khanal VK, Sah RB, Ghimire A. Depression among people living with type 2 diabetes in an urbanizing community of Nepal. *PloS one*. 2019;14(6):e0218119.
15. Schram MT, Baan CA, Pouwer F. Depression and quality of life in patients with diabetes: a systematic review from the European depression in diabetes (EDID) research consortium. *Curr Diabetes Rev*. 2009;5(2):112-9.
16. Gonzalez JS, Peyrot M, McCarl LA, Collins EM, Serpa L, Mimiaga MJ, et al. Depression and diabetes treatment nonadherence: a meta-analysis. *Diabetes care*. 2008;31(12):2398-403.



17. Ducat L, Rubenstein A, Philipson LH, Anderson BJ. A Review of the Mental Health Issues of Diabetes Conference. *Diabetes care*. 2015;38(2):333-8.
18. Ducat L, Philipson LH, Anderson BJ. The mental health comorbidities of diabetes. *JAMA*. 2014;312(7):691-2.
19. Kaur G, Tee GH, Ariaratnam S, Krishnapillai AS, China K. Depression, anxiety and stress symptoms among diabetics in Malaysia: a cross sectional study in an urban primary care setting. *BMC family practice*. 2013;14(1):1-13.
20. Paudel S, Dangal G, Chalise A, Bhandari TR, Dangal O. The Coronavirus Pandemic: What Does the Evidence Show? *Journal of Nepal Health Research Council*. 2020;18(1):1-9.
21. Alessi J, de Oliveira GB, Franco DW, Brino do Amaral B, Becker AS, Knijnik CP, et al. Mental health in the era of COVID-19: prevalence of psychiatric disorders in a cohort of patients with type 1 and type 2 diabetes during the social distancing. *Diabetology & metabolic syndrome*. 2020;12(1):76.
22. Chalise A, Paudel S. Mental Health Concern during COVID-19 Pandemic in Nepal. *Europasian Journal of Medical Sciences*. 2020;2(0).
23. Zimet GD, Dahlem NW, Zimet SG, Farley GK. The Multidimensional Scale of Perceived Social Support. *Journal of Personality Assessment*. 1988;52(1):30-41.
24. Tonsing K, Zimet GD, Tse S. Assessing social support among South Asians: The multidimensional scale of perceived social support. *Asian journal of psychiatry*. 2012;5(2):164-8.
25. Ahorsu DK, Lin C-Y, Imani V, Saffari M, Griffiths MD, Pakpour AH. The Fear of COVID-19 Scale: Development and Initial Validation. *Int J Ment Health Addict*. 2020:1-9.
26. Kroenke K, Spitzer RL, Williams JB. The PHQ-9: validity of a brief depression severity measure. *Journal of general internal medicine*. 2001;16(9):606-13.
27. Zigmond AS, Snaith RP. The hospital anxiety and depression scale. *Acta psychiatrica Scandinavica*. 1983;67(6):361-70.
28. Kohrt BA, Luitel NP, Acharya P, Jordans MJ. Detection of depression in low resource settings: validation of the Patient Health Questionnaire (PHQ-9) and cultural concepts of distress in Nepal. *BMC psychiatry*. 2016;16:58.
29. Risal A, Manandhar K, Linde M, Koju R, Steiner TJ, Holen A. Reliability and Validity of a Nepali-language Version of the Hospital Anxiety and Depression Scale (HADS). *Kathmandu University medical journal (KUMJ)*. 2015;13(50):115-24.
30. Sharma K, Dhungana G, Adhikari S, Bista Pandey A, Sharma M. Depression and Anxiety among Patients with Type II Diabetes Mellitus in Chitwan Medical College Teaching Hospital, Nepal. *Nursing research and practice*. 2021;2021:8846915.
31. Thapa S, Lamichhane N, Mishra DK. Depression among People Living with Type II Diabetes in Kathmandu Valley of Nepal: A CrossSectional Study. *Int J Health Sci Res*. 2019;9(11):10-7.
32. Sun N, Lou P, Shang Y, Zhang P, Wang J, Chang G, et al. Prevalence and determinants of depressive and anxiety symptoms in adults with type 2 diabetes in China: a cross-sectional study. *BMJ open*. 2016;6(8):e012540.
33. AlBekairy A, AbuRuz S, Alsabani B, Alshehri A, Aldebasi T, Alkatheri A, et al. Exploring Factors Associated with Depression and Anxiety among Hospitalized Patients with Type 2 Diabetes Mellitus. *Medical principles and practice : international journal of the Kuwait University, Health Science Centre*. 2017;26(6):547-53.

- 1
- 2
- 3
- 4 34. Al-Mohaimed AA. Prevalence and factors associated with anxiety and depression among
- 5 type 2 diabetes in Qassim: A descriptive cross-sectional study. *Journal of Taibah*
- 6 *University Medical Sciences*. 2017;12(5):430-6.
- 7 35. Tovilla-Zarate C, Juarez-Rojop I, Peralta Jimenez Y, Jimenez MA, Vazquez S, Bermudez-
- 8 Ocana D, et al. Prevalence of anxiety and depression among outpatients with type 2
- 9 diabetes in the Mexican population. *PloS one*. 2012;7(5):e36887.
- 10 36. Ganasegeran K, Renganathan P, Manaf RA, Al-Dubai SAR. Factors associated with
- 11 anxiety and depression among type 2 diabetes outpatients in Malaysia: a descriptive cross-
- 12 sectional single-centre study. *BMJ open*. 2014;4(4):e004794.
- 13 37. Khuwaja AK, Lalani S, Dhanani R, Azam IS, Rafique G, White F. Anxiety and depression
- 14 among outpatients with type 2 diabetes: A multi-centre study of prevalence and associated
- 15 factors. *Diabetology & metabolic syndrome*. 2010;2(1):72.
- 16 38. Rajput R, Gehlawat P, Gehlan D, Gupta R, Rajput M. Prevalence and predictors of
- 17 depression and anxiety in patients of diabetes mellitus in a tertiary care center. *Indian J*
- 18 *Endocrinol Metab*. 2016;20(6):746-51.
- 19 39. Engidaw NA, Wubetu AD, Basha EA. Prevalence of depression and its associated factors
- 20 among patients with diabetes mellitus at Tirunesh-Beijing general hospital, Addis Ababa,
- 21 Ethiopia. *BMC public health*. 2020;20(1):266.
- 22 40. Wu SF, Young LS, Yeh FC, Jian YM, Cheng KC, Lee MC. Correlations among social
- 23 support, depression, and anxiety in patients with type-2 diabetes. *The journal of nursing*
- 24 *research : JNR*. 2013;21(2):129-38.
- 25 41. Zhang W, Xu H, Zhao S, Yin S, Wang X, Guo J, et al. Prevalence and influencing factors
- 26 of co-morbid depression in patients with type 2 diabetes mellitus: a General Hospital based
- 27 study. *Diabetology & metabolic syndrome*. 2015;7:60.
- 28 42. Ramkisson S, Pillay BJ, Sibanda W. Social support and coping in adults with type 2
- 29 diabetes. *African journal of primary health care & family medicine*. 2017;9(1):e1-e8.
- 30 43. Pahari DP, Upadhyay R, Sharma CK. Depression among diabetic patients visiting a
- 31 diabetes center in Nepal. *Health Prospect: Journal of Public Health*. 2018;17:21-5.
- 32 44. Abate TW, Gedamu H. Psychosocial and clinical factors associated with depression among
- 33 individuals with diabetes in Bahir Dar City Administrative, Northwest Ethiopia. *Annals of*
- 34 *general psychiatry*. 2020;19:18.
- 35 45. Sweileh WM, Abu-Hadeed HM, Al-Jabi SW, Zyoud SH. Prevalence of depression among
- 36 people with type 2 diabetes mellitus: a cross sectional study in Palestine. *BMC public*
- 37 *health*. 2014;14:163.
- 38 46. Qiu S, Sun H, Liu Y, Kanu JS, Li R, Yu Y, et al. Prevalence and correlates of psychological
- 39 distress among diabetes mellitus adults in the Jilin province in China: a cross-sectional
- 40 study. *PeerJ*. 2017;5:e2869.
- 41 47. Raval A, Dhanaraj E, Bhansali A, Grover S, Tiwari P. Prevalence and determinants of
- 42 depression in type 2 diabetes patients in a tertiary care centre. *The Indian journal of medical*
- 43 *research*. 2010;132:195-200.
- 44 48. Joshi S, Dhungana RR, Subba UK. Illness Perception and Depressive Symptoms among
- 45 Persons with Type 2 Diabetes Mellitus: An Analytical Cross-Sectional Study in Clinical
- 46 Settings in Nepal. *Journal of diabetes research*. 2015;2015:908374.
- 47 49. Ali S, Stone MA, Peters JL, Davies MJ, Khunti K. The prevalence of co-morbid depression
- 48 in adults with Type 2 diabetes: a systematic review and meta-analysis. *Diabetic medicine*
- 49 *: a journal of the British Diabetic Association*. 2006;23(11):1165-73.
- 50
- 51
- 52
- 53
- 54
- 55
- 56
- 57
- 58
- 59
- 60

- 1  
2  
3 50. Salinero-Fort MA, Gomez-Campelo P, San Andres-Rebollo FJ, Cardenas-Valladolid J,  
4 Abanades-Herranz JC, Carrillo de Santa Pau E, et al. Prevalence of depression in patients  
5 with type 2 diabetes mellitus in Spain (the DIADEMA Study) : results from the  
6 MADIABETES cohort. *BMJ open*. 2018;8(9):e020768.  
7  
8 51. Musche V, Kohler H, Bäuerle A, Schweda A, Weismüller B, Fink M, et al. COVID-19-  
9 Related Fear, Risk Perception, and Safety Behavior in Individuals with Diabetes.  
10 *Healthcare*. 2021;9(4):480.  
11 52. Moradian S, Teufel M, Jahre L, Musche V, Fink M, Dinse H, et al. Mental health burden  
12 of patients with diabetes before and after the initial outbreak of COVID-19: predictors of  
13 mental health impairment. *BMC public health*. 2021;21(1):2068.  
14  
15  
16  
17  
18  
19  
20  
21  
22  
23  
24  
25  
26  
27  
28  
29  
30  
31  
32  
33  
34  
35  
36  
37  
38  
39  
40  
41  
42  
43  
44  
45  
46  
47  
48  
49  
50  
51  
52  
53  
54  
55  
56  
57  
58  
59  
60

## Questionnaire

### Eligibility Criteria:

**Q1: How long have you known that you have diabetes?**

Years\_\_\_\_\_ Months\_\_\_\_\_ If date is provided \_\_\_\_\_

**Q2: How long have you been residing at Pokhara Metropolitan?**

Years\_\_\_\_\_ Months\_\_\_\_\_ If date is provided \_\_\_\_\_

### Section-A: Demographic Information

**Q3. Age..... completed years**

**Q4. Gender.....**

**Q5. Ethnicity**

- |                         |                                    |                                               |
|-------------------------|------------------------------------|-----------------------------------------------|
| 0. Dalit                | 1. Disadvantaged Janajatis         | 2. Disadvantaged non-dalit Terai caste groups |
| 3. Religious Minorities | 4. Relatively advantaged Janajatis | 5. Upper caste groups                         |

**Q6. Marital Status**

- |                       |            |                         |
|-----------------------|------------|-------------------------|
| 0. Single (Unmarried) | 1. Married | 2. Separated            |
| 3. Divorced           | 4. Widowed | 5. Other (specify)..... |

**Q7. The total number of family members** (living together in the household sharing the same kitchen).....

**Q8. Type of Family**

- |            |          |             |
|------------|----------|-------------|
| 0. Nuclear | 1. Joint | 2. Extended |
|------------|----------|-------------|

**Q9. Educational Level**

- |                    |                                     |                            |
|--------------------|-------------------------------------|----------------------------|
| 0. Illiterate      | 1. Literate with informal education | 2. Primary Level           |
| 3. Secondary Level | 4. Higher Secondary Level           | 5. Undergraduate and above |

**Q10. What was your main occupation within the past year?**

- |                          |                      |                                |
|--------------------------|----------------------|--------------------------------|
| 0. Unemployed            | 1. Agriculture       | 2. Service(Private/Government) |
| 3. Daily wage laborer    | 4. Own a business    | 5. Oversees employment         |
| 6. Home Maker            | 7. Retired (Pension) | 8. Retired (without Pension)   |
| 9. Others (Specify)..... |                      |                                |

### Section-B: Health-related characteristics

**Q11. What types of treatment are you currently using?**

- |                            |                            |               |
|----------------------------|----------------------------|---------------|
| 0. No treatment            | 1. Oral tablet             | 2. Insulin    |
| 3. Both tablet and insulin | 4. Only dietary management | 5. Other..... |

**Q 12. Do you use Insulin for treatment of Diabetes management?**

- |        |       |
|--------|-------|
| 1. Yes | 2. No |
|--------|-------|

**Q 13. How difficult do you feel to follow the dietary recommendation for the management of your diabetes?**

- |                  |                    |                         |
|------------------|--------------------|-------------------------|
| 0. Too difficult | 1. A bit difficult | 2. Not difficult at all |
|------------------|--------------------|-------------------------|

**Q 14. Is there any health insurance to cover the diabetes related cost**

- |                         |                                 |                               |
|-------------------------|---------------------------------|-------------------------------|
| 0. Yes, cover full cost | 1. Yes, but covers partial cost | 2. . No there is no insurance |
|-------------------------|---------------------------------|-------------------------------|

**Q 15. Do you have any complications resulted due to diabetes?**

- |        |       |                                  |
|--------|-------|----------------------------------|
| 0. Yes | 1. No | If yes continue, if No go to Q18 |
|--------|-------|----------------------------------|

**Q 16. What are the complications resulted due to diabetes? (Multiple choices)**

- |                           |                    |                       |
|---------------------------|--------------------|-----------------------|
| 0. Cardiovascular disease | 1. Neuropathy      | 2. Nephropathy        |
| 3. Retinopathy            | 4. Skin conditions | 5. Hearing impairment |
|                           |                    | 6. Other_____         |

**Q 17. Number of complications**\_\_\_\_\_

**Q 18. Do you have any other chronic illness other than these complications?**

- |        |       |
|--------|-------|
| 0. Yes | 1. No |
|--------|-------|

If yes continue, if No go to Q 21

**Q 19. What are the chronic illness other than these complications that you have which was before you were diagnosed with Diabetes? (Multiple choices)**

0. Hypertension                      1. Hyperlipidemia                      2. Chronic Kidney condition (not resulted after Diabetes)  
 3. Cardiovascular disease not resulted after Diabetes                      4. COPD                      5. Thyroid                      6. Other \_\_\_\_\_

**Q 20. Number of additional illness (comorbidities) \_\_\_\_\_**

| <b>Q 21: Section D- Patient Health Questionnaire (PHQ-9)</b>                                                                                                                 |            |              |                                 |                  |
|------------------------------------------------------------------------------------------------------------------------------------------------------------------------------|------------|--------------|---------------------------------|------------------|
| Over the last 2 weeks, how often have you been bothered by any of the following problems?<br>(Use “√” to indicate your answer)                                               |            |              |                                 |                  |
|                                                                                                                                                                              | Not at all | Several Days | More than half the days of week | Nearly every day |
| 1. Little interest or pleasure in doing things                                                                                                                               | 0          | 1            | 2                               | 3                |
| 2. Feeling down, depressed or hopeless                                                                                                                                       | 0          | 1            | 2                               | 3                |
| 3. Trouble falling or staying asleep or sleeping too much                                                                                                                    | 0          | 1            | 2                               | 3                |
| 4. Feeling tired or having little energy                                                                                                                                     | 0          | 1            | 2                               | 3                |
| 5. Poor appetite or overeating                                                                                                                                               | 0          | 1            | 2                               | 3                |
| 6. Feeling bad about yourself- or that you are a failure or have let yourself or your family down                                                                            | 0          | 1            | 2                               | 3                |
| 7. Trouble concentrating on things, such as reading the newspaper or watching television                                                                                     | 0          | 1            | 2                               | 3                |
| 8. Moving or speaking so slowly that other people could have noticed? Or the opposite - being so fidgety or restless that you have been moving around a lot more than usual? | 0          | 1            | 2                               | 3                |
| 9. Thoughts that you would be better off dead, or of hurting yourself in some way?                                                                                           | 0          | 1            | 2                               | 3                |

**Q 22: Section E- Hospital Anxiety and Depression Scale-Anxiety Subscale**

Please tick the statement about how you have been feeling in the past week. Don't take too long over you replies: your immediate is best.

- A1. I feel tense or 'wound up':  
 3. Most of the time                      2. A lot of the time  
 1. From time to time, occasionally                      0. Not at all
- A2. I get a sort of frightened feeling like 'butterflies' in the stomach  
 3. Very Often                      2. Quite Often  
 1. Occasionally                      0. Not at all
- A3. I get a sort of frightened feeling as if something awful is about to happen  
 3. Very definitely and quite badly                      2. Yes, but not too badly  
 1. A little, but it doesn't worry me                      0. Not at all
- A4. I feel restless as I have to be on the move:  
 3. Very much indeed                      2. Quite a lot  
 1. Not very much                      0. Not at all
- A5. Worrying thoughts go through my mind:  
 3. A great deal of the time                      2. A lot of the time  
 1. From time to time, but not too often                      0. Only occasionally
- A6. I get sudden feeling of panic

3. Very Often  
1. Not very often
2. Quite Often  
0. Not at all
- A7. I can sit at ease and feel relaxed  
0. Definitely  
2. Not often
1. Usually  
3. Not at all

**Section F: History of Disease and Lifestyle Factors**

- Q23. Have you ever been diagnosed with any mental distress such as depression, anxiety or so on?  
0. Yes  
1. No  
If Yes, specify.....
- Q24. In your family, has anyone in the last three generations been diagnosed with any mental distress such as depression, anxiety or so on?  
0. Yes  
1. No  
2. Don't Know  
If Yes, specify.....
- Q25. In the past one month have you ever used any tobacco products (smoking, chewing tobacco) ?  
0. Yes  
1. No
- Q26. In the past one month have your ever consumed any hard drink or alcohol?  
0. Yes  
1. No
- Q27. How many hours in an average do you sleep in a day? (based on the average of past one week)  
Sleep hours.....hrs per day
- Q28. Are you satisfied with your sleep quality and duration?  
0. Satisfied  
1. Not Satisfied

**Section G: COVID-19 Status**

- Q.29. Have you ever got tested for COVID-19?  
0. Yes  
1. No
- Q.30 what was the result  
0. Positive  
1. Negative  
2. Never Tested
- Q.31 Have you received any COVID-19 vaccine?  
0. Yes, Received vaccine  
1. No, didn't received vaccine
- Q.32 Have you received complete two doses?  
0. Complete vaccine dose  
1. Incomplete vaccine dose  
2. Didn't received vaccine
- Q 33: Please respond to each item by ticking (√) one of the five (5) responses that reflects how you feel, think or act toward COVID-19

| Fear of COVID-19 Items                                                                      | Strongly Disagree | Disagree | Neutral | Agree | Strongly Agree |
|---------------------------------------------------------------------------------------------|-------------------|----------|---------|-------|----------------|
| 1. I am most afraid of Corona                                                               | 1                 | 2        | 3       | 4     | 5              |
| 2. It makes me uncomfortable to think about Corona                                          | 1                 | 2        | 3       | 4     | 5              |
| 3. My hands become clammy when I think about Corona                                         | 1                 | 2        | 3       | 4     | 5              |
| 4. I am afraid of losing my life because of Corona                                          | 1                 | 2        | 3       | 4     | 5              |
| 5. When I watch news and stories about Corona on social media, I become nervous or anxious. | 1                 | 2        | 3       | 4     | 5              |
| 6. I cannot sleep because I'm worrying about getting Corona infection/ reinfection.         | 1                 | 2        | 3       | 4     | 5              |
| 7. My heart races or palpitates when I think about getting Corona infection/ reinfection.   | 1                 | 2        | 3       | 4     | 5              |

**Q 34. Section C. Multidimensional Scale of Perceived Social Support**



We are interested in how you feel about the following statements. Read each statement carefully. Indicate how you feel about each statement by selecting one for seven options at each statement-making a circle.

|                                                                       | Very Strongly Disagree | Strongly Disagree | Mildly Disagree | Neutral | Mildly Agree | Strongly Agree | Very Strongly Agree |
|-----------------------------------------------------------------------|------------------------|-------------------|-----------------|---------|--------------|----------------|---------------------|
| 1. I get the emotional help & support I need from my family           | 1                      | 2                 | 3               | 4       | 5            | 6              | 7                   |
| 2. I can talk about my problems with my family.                       | 1                      | 2                 | 3               | 4       | 5            | 6              | 7                   |
| 3. My family really tries to help me.                                 | 1                      | 2                 | 3               | 4       | 5            | 6              | 7                   |
| 4. My family is willing to help me make decisions.                    | 1                      | 2                 | 3               | 4       | 5            | 6              | 7                   |
| 5. I have friends with whom I can share my joys and sorrows.          | 1                      | 2                 | 3               | 4       | 5            | 6              | 7                   |
| 6. I can talk about my problems with my friends.                      | 1                      | 2                 | 3               | 4       | 5            | 6              | 7                   |
| 7. My friends really try to help me.                                  | 1                      | 2                 | 3               | 4       | 5            | 6              | 7                   |
| 8. I can count on my friends when things go wrong                     | 1                      | 2                 | 3               | 4       | 5            | 6              | 7                   |
| 9. There is a special person who is around when I am in need.         | 1                      | 2                 | 3               | 4       | 5            | 6              | 7                   |
| 10. There is a special person with whom I can share joys and sorrows. | 1                      | 2                 | 3               | 4       | 5            | 6              | 7                   |
| 11. I have a special person who is a real source of comfort to me     | 1                      | 2                 | 3               | 4       | 5            | 6              | 7                   |
| 12. There is a special person in my life who cares about my feelings. | 1                      | 2                 | 3               | 4       | 5            | 6              | 7                   |

Thank you for your participation

To Be filled by Investigator

Remark by the data collector

.....  
Signature of the Data collector



STROBE Statement—Checklist of items that should be included in reports of *cross-sectional studies*

|                              | Item No | Recommendation                                                                                                                                                                                    | Page No |
|------------------------------|---------|---------------------------------------------------------------------------------------------------------------------------------------------------------------------------------------------------|---------|
| <b>Title and abstract</b>    | 1       | (a) Indicate the study's design with a commonly used term in the title or the abstract                                                                                                            | 1,2     |
|                              |         | (b) Provide in the abstract an informative and balanced summary of what was done and what was found                                                                                               | 2       |
| <b>Introduction</b>          |         |                                                                                                                                                                                                   |         |
| Background/rationale         | 2       | Explain the scientific background and rationale for the investigation being reported                                                                                                              | 3,4     |
| Objectives                   | 3       | State specific objectives, including any prespecified hypotheses                                                                                                                                  | 4       |
| <b>Methods</b>               |         |                                                                                                                                                                                                   |         |
| Study design                 | 4       | Present key elements of study design early in the paper                                                                                                                                           | 5       |
| Setting                      | 5       | Describe the setting, locations, and relevant dates, including periods of recruitment, exposure, follow-up, and data collection                                                                   | 5       |
| Participants                 | 6       | (a) Give the eligibility criteria, and the sources and methods of selection of participants                                                                                                       | 5       |
| Variables                    | 7       | Clearly define all outcomes, exposures, predictors, potential confounders, and effect modifiers. Give diagnostic criteria, if applicable                                                          | 6       |
| Data sources/<br>measurement | 8*      | For each variable of interest, give sources of data and details of methods of assessment (measurement). Describe comparability of assessment methods if there is more than one group              | 6       |
| Bias                         | 9       | Describe any efforts to address potential sources of bias                                                                                                                                         | 7       |
| Study size                   | 10      | Explain how the study size was arrived at                                                                                                                                                         | 5       |
| Quantitative variables       | 11      | Explain how quantitative variables were handled in the analyses. If applicable, describe which groupings were chosen and why                                                                      | 6,7     |
| Statistical methods          | 12      | (a) Describe all statistical methods, including those used to control for confounding                                                                                                             | 7       |
|                              |         | (b) Describe any methods used to examine subgroups and interactions                                                                                                                               |         |
|                              |         | (c) Explain how missing data were addressed                                                                                                                                                       | 7       |
|                              |         | (d) If applicable, describe analytical methods taking account of sampling strategy                                                                                                                |         |
|                              |         | (e) Describe any sensitivity analyses                                                                                                                                                             |         |
| <b>Results</b>               |         |                                                                                                                                                                                                   |         |
| Participants                 | 13*     | (a) Report numbers of individuals at each stage of study—eg numbers potentially eligible, examined for eligibility, confirmed eligible, included in the study, completing follow-up, and analysed | 7       |
|                              |         | (b) Give reasons for non-participation at each stage                                                                                                                                              |         |
|                              |         | (c) Consider use of a flow diagram                                                                                                                                                                |         |
| Descriptive data             | 14*     | (a) Give characteristics of study participants (eg demographic, clinical, social) and information on exposures and potential confounders                                                          | 7,8,9   |
|                              |         | (b) Indicate number of participants with missing data for each variable of interest                                                                                                               | 7       |
| Outcome data                 | 15*     | Report numbers of outcome events or summary measures                                                                                                                                              | 7,8,9   |

1  
2  
3  
4  
5  
6  
7  
8  
9  
10  
11  
12  
13  
14  
15  
16  
17  
18  
19  
20  
21  
22  
23  
24  
25  
26  
27  
28  
29  
30  
31  
32  
33  
34  
35  
36  
37  
38  
39  
40  
41  
42  
43  
44  
45  
46  
47  
48  
49  
50  
51  
52  
53  
54  
55  
56  
57  
58  
59  
60

|                          |    |                                                                                                                                                                                                              |          |
|--------------------------|----|--------------------------------------------------------------------------------------------------------------------------------------------------------------------------------------------------------------|----------|
| Main results             | 16 | (a) Give unadjusted estimates and, if applicable, confounder-adjusted estimates and their precision (eg, 95% confidence interval). Make clear which confounders were adjusted for and why they were included | 10,11,12 |
|                          |    | (b) Report category boundaries when continuous variables were categorized                                                                                                                                    |          |
|                          |    | (c) If relevant, consider translating estimates of relative risk into absolute risk for a meaningful time period                                                                                             |          |
| Other analyses           | 17 | Report other analyses done—eg analyses of subgroups and interactions, and sensitivity analyses                                                                                                               | 10,11,12 |
| <b>Discussion</b>        |    |                                                                                                                                                                                                              |          |
| Key results              | 18 | Summarise key results with reference to study objectives                                                                                                                                                     | 12,13,14 |
| Limitations              | 19 | Discuss limitations of the study, taking into account sources of potential bias or imprecision. Discuss both direction and magnitude of any potential bias                                                   | 15       |
| Interpretation           | 20 | Give a cautious overall interpretation of results considering objectives, limitations, multiplicity of analyses, results from similar studies, and other relevant evidence                                   | 15       |
| Generalisability         | 21 | Discuss the generalisability (external validity) of the study results                                                                                                                                        | 15       |
| <b>Other information</b> |    |                                                                                                                                                                                                              |          |
| Funding                  | 22 | Give the source of funding and the role of the funders for the present study and, if applicable, for the original study on which the present article is based                                                | 16       |

\*Give information separately for exposed and unexposed groups.

**Note:** An Explanation and Elaboration article discusses each checklist item and gives methodological background and published examples of transparent reporting.
